# Supplementary material for: Enhancing gene editing specificity by attenuating DNA cleavage kinetics
Source: Springer Nature journal article supplement (doi:10.1038/s41587-019-0186-z), 2019-07-29
Supplement: 41587_2019_186_MOESM1_ESM.pdf [file 41587_2019_186_MOESM1_ESM.pdf]

In the format provided by the authors and unedited.

# Enhancing gene editing specificity by attenuating DNA cleavage kinetics

Jeffrey C. Miller, Deepak P. Patil, Danny F. Xia , Charles B. Paine, Friedrich Fauser, Hunter W. Richards, David A. Shivak, Yuri R. Bendaña, Sarah J. Hinkley, Nicholas A. Scarlott, Stephen C. Lam , Andreas Reik, Yuanyue Zhou, David E. Paschon, Patrick Li, Tenzin Wangzor, Gary Lee, Lei Zhang and Edward J. Rebar \*

---

Sangamo Therapeutics, Inc., Richmond, CA, USA. \*e-mail: [erebar@sangamo.com](mailto:erebar@sangamo.com)

| FokI domain variant | Screening results: ZFN-L context |      |       |      |      |              | Screening results: ZFN-R context |      |       |      |      |              | DNA proximity (Å) |
|---------------------|----------------------------------|------|-------|------|------|--------------|----------------------------------|------|-------|------|------|--------------|-------------------|
|                     | % indels                         |      |       |      |      | on:off ratio | % indels                         |      |       |      |      | on:off ratio |                   |
|                     | AAVS1                            | OT1  | OT2   | OT3  | OT4  |              | AAVS1                            | OT1  | OT2   | OT3  | OT4  |              |                   |
| 1                   | 2                                | 3    | 4     | 5    | 6    | 7            | 8                                | 9    | 10    | 11   | 12   | 13           | 14                |
| < parent >          | 65.51                            | 3.37 | 8.02  | 2.40 | 2.44 | 4.0          | 65.51                            | 3.37 | 8.02  | 2.40 | 2.44 | 4.0          | NA                |
| N417D               | 85.45                            | 5.52 | 10.52 | 3.64 | 2.84 | 3.8          | 81.91                            | 4.31 | 13.15 | 3.08 | 5.24 | 3.2          | 4.3               |
| N542D               | 81.21                            | 4.47 | 12.76 | 3.15 | 3.12 | 3.5          | 68.21                            | 4.56 | 9.61  | 2.90 | 3.58 | 3.3          | 18.8              |
| Q481E               | 81.03                            | 0.11 | 0.06  | 0.31 | 0.12 | 136.0        | 77.62                            | 0.09 | 0.33  | 0.02 | 0.25 | 110.8        | 7.1               |
| K525S               | 79.90                            | 1.24 | 0.83  | 0.88 | 0.34 | 24.2         | 71.23                            | 0.18 | 2.11  | 0.19 | 1.05 | 20.2         | 5.5               |
| N476D               | 74.91                            | 0.02 | 0.14  | 0.10 | 0.08 | 216.0        | 50.69                            | 0.15 | 0.21  | 0.12 | 0.24 | 70.8         | 4.2               |
| R416S               | 64.78                            | 2.27 | 1.00  | 1.20 | 0.31 | 13.5         | 67.88                            | 0.52 | 4.42  | 0.58 | 2.30 | 8.7          | 6.5               |
| K448S               | 64.04                            | 3.05 | 6.31  | 2.79 | 2.27 | 4.4          | 63.86                            | 1.50 | 4.58  | 1.24 | 1.90 | 6.9          | 5.8               |
| N527D               | 61.79                            | 0.35 | 1.35  | 0.67 | 0.07 | 25.4         | 63.76                            | 0.77 | 2.15  | 1.13 | 1.00 | 12.6         | 2.1               |
| K441S               | 51.77                            | 2.96 | 6.82  | 2.04 | 2.43 | 3.6          | 59.50                            | 5.77 | 6.63  | 2.68 | 2.70 | 3.3          | 13.7              |
| K400S               | 51.37                            | 2.66 | 5.39  | 1.75 | 1.68 | 4.5          | 30.43                            | 1.33 | 2.28  | 0.99 | 0.71 | 5.7          | 26.5              |
| R422S               | 49.23                            | 1.15 | 1.12  | 1.15 | 0.29 | 13.3         | 60.31                            | 0.37 | 1.31  | 0.38 | 1.33 | 17.8         | 7.0               |
| K497S               | 42.49                            | 2.21 | 3.86  | 1.61 | 1.42 | 4.7          | 46.56                            | 2.19 | 4.75  | 1.58 | 1.49 | 4.7          | 14.7              |
| Q531E               | 40.88                            | 0.02 | 0.04  | 0.01 | 0.05 | 348.2        | 30.74                            | 0.30 | 0.47  | 0.74 | 0.06 | 19.5         | 7.0               |
| K434S               | 40.77                            | 2.66 | 5.19  | 1.75 | 1.75 | 3.6          | 55.30                            | 4.26 | 6.55  | 2.87 | 3.35 | 3.2          | 21.3              |
| K506S               | 39.60                            | 2.13 | 5.25  | 1.62 | 1.70 | 3.7          | 44.66                            | 2.24 | 4.57  | 1.48 | 1.51 | 4.6          | 15.6              |
| R439S               | 38.71                            | 2.64 | 4.70  | 1.57 | 1.68 | 3.7          | 52.25                            | 4.09 | 6.93  | 2.30 | 2.76 | 3.2          | 20.0              |
| N573D               | 35.83                            | 1.75 | 3.42  | 1.24 | 1.09 | 4.8          | 49.18                            | 3.72 | 6.36  | 2.16 | 2.45 | 3.3          | 17.6              |
| K559S               | 33.44                            | 1.88 | 3.51  | 1.38 | 1.09 | 4.3          | 40.49                            | 2.00 | 4.12  | 1.25 | 1.29 | 4.7          | 27.8              |
| K529S               | 31.39                            | 1.21 | 2.51  | 1.23 | 0.87 | 5.4          | 28.09                            | 1.07 | 2.42  | 0.84 | 0.75 | 5.5          | 7.3               |
| Q420E               | 30.97                            | 1.40 | 2.18  | 1.07 | 0.86 | 5.6          | 33.86                            | 1.20 | 2.41  | 0.99 | 0.86 | 6.2          | 4.8               |
| K571S               | 27.58                            | 1.23 | 2.59  | 1.10 | 0.96 | 4.7          | 15.89                            | 0.65 | 1.04  | 0.41 | 0.38 | 6.4          | 21.0              |
| N578D               | 26.00                            | 1.33 | 2.22  | 1.09 | 0.91 | 4.7          | 12.88                            | 0.53 | 0.74  | 0.29 | 0.39 | 6.6          | 18.6              |
| R570S               | 25.49                            | 1.04 | 2.14  | 0.87 | 0.78 | 5.3          | 34.96                            | 1.68 | 3.36  | 1.08 | 1.09 | 4.9          | 24.0              |
| R398S               | 24.44                            | 1.02 | 1.91  | 0.77 | 0.69 | 5.6          | 35.63                            | 1.27 | 2.54  | 0.90 | 0.72 | 6.6          | 23.4              |
| R447S               | 23.33                            | 0.45 | 0.35  | 0.27 | 0.13 | 19.4         | 45.90                            | 0.06 | 0.04  | 0.03 | 0.06 | 234.5        | 4.0               |
| K402S               | 22.22                            | 1.35 | 2.37  | 1.02 | 0.95 | 3.9          | 29.27                            | 1.35 | 2.33  | 0.83 | 0.79 | 5.5          | 27.7              |
| N540D               | 18.17                            | 0.71 | 1.35  | 0.57 | 0.47 | 5.9          | 36.57                            | 1.38 | 2.82  | 0.95 | 0.89 | 6.1          | 19.8              |
| Q493E               | 16.63                            | 0.64 | 1.02  | 0.47 | 0.39 | 6.6          | 22.16                            | 0.90 | 1.52  | 0.63 | 0.74 | 5.8          | 17.8              |
| K393S               | 13.47                            | 0.55 | 0.62  | 0.46 | 0.26 | 7.1          | 17.55                            | 0.43 | 1.12  | 0.33 | 0.48 | 7.4          | 19.8              |
| K427S               | 12.48                            | 0.71 | 1.14  | 0.53 | 0.45 | 4.4          | 17.97                            | 0.71 | 1.35  | 0.49 | 0.44 | 6.0          | 12.5              |
| K394S               | 12.12                            | 0.46 | 0.66  | 0.45 | 0.29 | 6.5          | 20.67                            | 0.62 | 1.42  | 0.51 | 0.60 | 6.5          | 19.3              |
| N574D               | 10.76                            | 0.36 | 0.92  | 0.27 | 0.26 | 6.0          | 6.95                             | 0.22 | 0.40  | 0.11 | 0.10 | 8.4          | 14.3              |
| N502D               | 9.32                             | 0.21 | 0.66  | 0.30 | 0.27 | 6.5          | 12.27                            | 0.30 | 0.56  | 0.27 | 0.15 | 9.6          | 9.4               |
| K516S               | 6.04                             | 0.26 | 0.42  | 0.17 | 0.19 | 5.9          | 9.92                             | 0.42 | 0.52  | 0.26 | 0.19 | 7.1          | 18.1              |
| N536D               | 5.32                             | 0.07 | 0.15  | 0.05 | 0.05 | 16.2         | 7.18                             | 0.15 | 0.14  | 0.08 | 0.07 | 16.2         | 15.3              |
| R569S               | 5.15                             | 0.06 | 0.10  | 0.06 | 0.07 | 17.6         | 10.00                            | 0.25 | 0.32  | 0.18 | 0.14 | 11.3         | 23.8              |
| N500D               | 2.63                             | 0.03 | 0.01  | 0.02 | 0.02 | 36.8         | 3.24                             | 0.01 | 0.01  | 0.01 | 0.02 | 72.5         | 11.1              |
| R495S               | 2.10                             | 0.01 | 0.00  | 0.00 | 0.03 | 42.4         | 3.00                             | 0.00 | 0.03  | 0.01 | 0.03 | 42.2         | 16.7              |
| N492D               | 0.82                             | 0.01 | 0.01  | 0.00 | 0.06 | 10.4         | 0.84                             | 0.00 | 0.01  | 0.00 | 0.01 | 26.7         | 14.8              |
| R534S               | ND                               | ND   | ND    | ND   | ND   | ND           | 27.26                            | 1.61 | 1.76  | 0.82 | 0.83 | 5.4          | 10.8              |
| GFP                 | 0.03                             | 0.01 | 0.00  | 0.00 | 0.02 | 0.9          | 0.03                             | 0.01 | 0.00  | 0.00 | 0.02 | 0.9          | NA                |

**Supplementary Table 1.** On and off-target activity of variants of the AAVS1 ZFN dimer bearing single-residue substitutions in the FokI cleavage domain of either the left or right ZFN (ZFN-L or ZFN-R). ZFNs were delivered to human K562 cells via mRNA nucleofection, followed by genomic DNA isolation at day 3 and deep sequencing analysis for indels at the intended target or four off-target sites. Columns 2-7 summarize results obtained for screening each variant in the ZFN-L context (i.e. each tested dimer consisted of a ZFN-L variant bearing the indicated substitution paired with an unmodified ZFN-R). Column 2 provides % indels measured at the intended target, with columns 3-6 indicating % indels at four previously known off-target sites. Each value is the average of four biological replicates (or three replicates in rare cases where a PCR reaction failed). Entries are provided in order of decreasing on-target % indels (column 2) with the exception that the parent, unmodified dimer is listed at top. Column 7 lists the on:off-target indel ratio (= % on-target indels / total off-target indels). To help highlight relative signal intensities, table values are embedded in heat maps (green – on target indels; red – off-target indels; blue – on:off ratio). Arrows highlight variants that both retain substantial on-target activity (>60% of parent) and exhibit a >3-fold increase in on:off ratio relative to parent. These

residues are underlined in figure 1b and the corresponding data points are bounded by a red box in figure 1c. Columns 8-13 summarize results obtained for screening each variant in the ZFN-R context. It can be seen by inspection of heat map intensities that results in the ZFN-L and ZFN-R contexts are broadly concordant. At far right, column 14 provides the distance in Angstroms between the alpha carbon and the nearest phosphate oxygen in the DNA backbone of a molecular model of a FokI dimer bound to DNA. Note that K469 was not mutated in this study because it is part of the active site<sup>61</sup> and R487 was not mutated because it is required for FokI dimerization (*Proc. Natl Acad. Sci. USA*, Bitinaite et al., 1997). Note also that variant N476D was reported as allowing enhanced cleavage activity at 30 °C but was not characterized for specificity in that study<sup>60</sup>.

|      |  |             |             |                   |         |                         |       |          |         |         |      |      |       |      |       |      |       |      |     |     |    |     |   |     |   |   |   |   |     |   |   |   |   |   |     |   |   |   |   |   |   |   |   |   |   |   |   |   |   |
|------|--|-------------|-------------|-------------------|---------|-------------------------|-------|----------|---------|---------|------|------|-------|------|-------|------|-------|------|-----|-----|----|-----|---|-----|---|---|---|---|-----|---|---|---|---|---|-----|---|---|---|---|---|---|---|---|---|---|---|---|---|---|
|      |  | 390         | 400         | 410               | 420     | 430                     |       |          |         |         |      |      |       |      |       |      |       |      |     |     |    |     |   |     |   |   |   |   |     |   |   |   |   |   |     |   |   |   |   |   |   |   |   |   |   |   |   |   |   |
| FokI |  | QLV         | KSELEEKK    | SELRHKLKYPHE      | YIELIE  | IARNSTQDRILFEMKVME      |       |          |         |         |      |      |       |      |       |      |       |      |     |     |    |     |   |     |   |   |   |   |     |   |   |   |   |   |     |   |   |   |   |   |   |   |   |   |   |   |   |   |   |
| H1   |  | -LV         | KGEMEKKK    | SDLRHKLKHVPHE     | YIELIE  | IAQDSKQNRLFEFKVVVE      |       |          |         |         |      |      |       |      |       |      |       |      |     |     |    |     |   |     |   |   |   |   |     |   |   |   |   |   |     |   |   |   |   |   |   |   |   |   |   |   |   |   |   |
| H2   |  | QIV         | KSSIEMS     | KANMRDNLQMLPHD    | YIELIE  | ISQDPYQNRIFEMKVMD       |       |          |         |         |      |      |       |      |       |      |       |      |     |     |    |     |   |     |   |   |   |   |     |   |   |   |   |   |     |   |   |   |   |   |   |   |   |   |   |   |   |   |   |
| H3   |  | - - -       | KSSTEE      | LKAQLRTQLTNISLD   | YLQLVD  | ISTDSKQNRLFEMKVMD       |       |          |         |         |      |      |       |      |       |      |       |      |     |     |    |     |   |     |   |   |   |   |     |   |   |   |   |   |     |   |   |   |   |   |   |   |   |   |   |   |   |   |   |
| H4   |  | - - I       | KSNISL      | LKDELRGQISHISHE   | YLSLID  | LAFDKQNRLFEMKVLE        |       |          |         |         |      |      |       |      |       |      |       |      |     |     |    |     |   |     |   |   |   |   |     |   |   |   |   |   |     |   |   |   |   |   |   |   |   |   |   |   |   |   |   |
| H5   |  | KLA         | KSSQSET     | KEKLRKLRNLPHE     | YLSLVD  | LAYDSKQNRLFEMKVI        |       |          |         |         |      |      |       |      |       |      |       |      |     |     |    |     |   |     |   |   |   |   |     |   |   |   |   |   |     |   |   |   |   |   |   |   |   |   |   |   |   |   |   |
| H6   |  | KIS         | KTNILE      | LKDKVRDKLKYVDHRY  | LALID   | LAYDGTANRDFEFIQTID      |       |          |         |         |      |      |       |      |       |      |       |      |     |     |    |     |   |     |   |   |   |   |     |   |   |   |   |   |     |   |   |   |   |   |   |   |   |   |   |   |   |   |   |
| H7   |  | - - V       | KSEVS       | VFKDYLRTHLTHVDHRY | LILVD   | LGFDSGSDRDYEMKTA        |       |          |         |         |      |      |       |      |       |      |       |      |     |     |    |     |   |     |   |   |   |   |     |   |   |   |   |   |     |   |   |   |   |   |   |   |   |   |   |   |   |   |   |
| H8   |  | QEL         | KDEQA       | EKRKAKFLKETNLP    | MYIELLD | IAYDGKRNDFEFIVTME       |       |          |         |         |      |      |       |      |       |      |       |      |     |     |    |     |   |     |   |   |   |   |     |   |   |   |   |   |     |   |   |   |   |   |   |   |   |   |   |   |   |   |   |
| H9   |  | KVS         | KTNILE      | LKDNTREKLVYLDHRY  | YLSLFD  | LAYDDKASRDFEFQTID       |       |          |         |         |      |      |       |      |       |      |       |      |     |     |    |     |   |     |   |   |   |   |     |   |   |   |   |   |     |   |   |   |   |   |   |   |   |   |   |   |   |   |   |
| H10  |  | - - -       | - - I       | EEQKAIFLQKTK      | - LPLSY | YIELLEIARDGKRSRDFEFITME |       |          |         |         |      |      |       |      |       |      |       |      |     |     |    |     |   |     |   |   |   |   |     |   |   |   |   |   |     |   |   |   |   |   |   |   |   |   |   |   |   |   |   |
|      |  | 440         | 450         | 460               | 470     | 480                     |       |          |         |         |      |      |       |      |       |      |       |      |     |     |    |     |   |     |   |   |   |   |     |   |   |   |   |   |     |   |   |   |   |   |   |   |   |   |   |   |   |   |   |
| FokI |  | FFMKVYGYR   | GKH         | LGGS              | RKPD    | GAIY                    | YTVG  | SPIDY    | GVIV    | DTKAY   | SGGY | NLP  | IG    |      |       |      |       |      |     |     |    |     |   |     |   |   |   |   |     |   |   |   |   |   |     |   |   |   |   |   |   |   |   |   |   |   |   |   |   |
| H1   |  | FLKEVYDYN   | GKH         | LGGS              | RKPD    | GALY                    | TNG   | LKTDY    | GIIL    | DTKAY   | KDGY | SLPI | S     |      |       |      |       |      |     |     |    |     |   |     |   |   |   |   |     |   |   |   |   |   |     |   |   |   |   |   |   |   |   |   |   |   |   |   |   |
| H2   |  | LFINEYGF    | SGSH        | LGGS              | RKPD    | GAMY                    | AHG   | - - -    | FGVIV   | DTKAY   | KDGY | NLP  | IS    |      |       |      |       |      |     |     |    |     |   |     |   |   |   |   |     |   |   |   |   |   |     |   |   |   |   |   |   |   |   |   |   |   |   |   |   |
| H3   |  | LFINE       | LDFK        | SSH               | LGGS    | RKPD                    | GAVY  | TT - - - | NYGIIV  | DTKAY   | KDGY | NLP  | IS    |      |       |      |       |      |     |     |    |     |   |     |   |   |   |   |     |   |   |   |   |   |     |   |   |   |   |   |   |   |   |   |   |   |   |   |   |
| H4   |  | LLVNE       | YGF         | KGRH              | LGGS    | RKPD                    | GIVY  | STTLEDNF | GIIV    | DTKAY   | SEGY | SLPI | S     |      |       |      |       |      |     |     |    |     |   |     |   |   |   |   |     |   |   |   |   |   |     |   |   |   |   |   |   |   |   |   |   |   |   |   |   |
| H5   |  | LLTEE       | CGF         | QGLH              | LGGS    | RRPD                    | GVLY  | TAGLTDNY | GIIL    | DTKAY   | SSGY | SLPI | IA    |      |       |      |       |      |     |     |    |     |   |     |   |   |   |   |     |   |   |   |   |   |     |   |   |   |   |   |   |   |   |   |   |   |   |   |   |
| H6   |  | LLINE       | LKFK        | KGVR              | LGES    | RKPD                    | GII   | SYNIN    | - - -   | GVIID   | NKAY | STGY | NLP   | IN   |       |      |       |      |     |     |    |     |   |     |   |   |   |   |     |   |   |   |   |   |     |   |   |   |   |   |   |   |   |   |   |   |   |   |   |
| H7   |  | LFTA        | ELGF        | MGAR              | RGD     | TRKPD                   | V     | CVYHG    | A - - - | GLIID   | NKAY | GKGY | SLPI  | IK   |       |      |       |      |     |     |    |     |   |     |   |   |   |   |     |   |   |   |   |   |     |   |   |   |   |   |   |   |   |   |   |   |   |   |   |
| H8   |  | LF          | RNVY        | RLHS              | KL      | LGGS                    | RKPD  | G        | LLYQD   | - - -   | RF   | GVIV | DTKAY | GKGY | SK    | IN   |       |      |     |     |    |     |   |     |   |   |   |   |     |   |   |   |   |   |     |   |   |   |   |   |   |   |   |   |   |   |   |   |   |
| H9   |  | LLINE       | LQFK        | GLR               | LGES    | RRKPD                   | G     | IYGVN    | - - - - | GVIID   | NKAY | SKGY | NLP   | IR   |       |      |       |      |     |     |    |     |   |     |   |   |   |   |     |   |   |   |   |   |     |   |   |   |   |   |   |   |   |   |   |   |   |   |   |
| H10  |  | LF          | KN          | IYK               | INAR    | ILGG                    | ARKPD | G        | VLYMP   | - - - - | EF   | GVIV | DTKAY | ADGY | SK    | IA   |       |      |     |     |    |     |   |     |   |   |   |   |     |   |   |   |   |   |     |   |   |   |   |   |   |   |   |   |   |   |   |   |   |
|      |  | 490         | 500         | 510               | 520     | 530                     |       |          |         |         |      |      |       |      |       |      |       |      |     |     |    |     |   |     |   |   |   |   |     |   |   |   |   |   |     |   |   |   |   |   |   |   |   |   |   |   |   |   |   |
| FokI |  | <u>QADE</u> | <u>MQRY</u> | VEEN              | QTRNKH  | INPN                    | EW    | KVY      | PSS     | SVTE    | FKF  | FLFV | SGHF  | KGN  | YKA   |      |       |      |     |     |    |     |   |     |   |   |   |   |     |   |   |   |   |   |     |   |   |   |   |   |   |   |   |   |   |   |   |   |   |
| H1   |  | <u>QADE</u> | <u>MQRY</u> | V                 | ENNN    | RNA                     | I     | INPN     | EW      | KVY     | PNS  | I    | LD    | F    | KFLFV | SGFF | KGDY  | KK   |     |     |    |     |   |     |   |   |   |   |     |   |   |   |   |   |     |   |   |   |   |   |   |   |   |   |   |   |   |   |   |
| H2   |  | <u>QADE</u> | <u>ME</u>   | RY                | VREN    | IDR                     | NEHV  | N        | NR      | W       | N    | I    | F     | P    | EDT   | NEY  | KFLFV | SGFF | KGN | F   | E  | K   |   |     |   |   |   |   |     |   |   |   |   |   |     |   |   |   |   |   |   |   |   |   |   |   |   |   |   |
| H3   |  | <u>QADE</u> | <u>ME</u>   | RY                | VREN    | IDR                     | NKGI  | N        | PN      | EW      | T    | I    | F     | P    | SS    | I    | ND    | F    | T   | F   | FV | SGY | F | KGN | F | E | G |   |     |   |   |   |   |   |     |   |   |   |   |   |   |   |   |   |   |   |   |   |   |
| H4   |  | <u>QADE</u> | <u>ME</u>   | RY                | VREN    | S                       | NR    | D        | E       | E       | V    | NP   | N     | K    | W     | E    | N     | F    | S   | E   | E  | V   | K | Y   | F | V | F | I | SGS | F | K | G | F | E | E   |   |   |   |   |   |   |   |   |   |   |   |   |   |   |
| H5   |  | <u>QADE</u> | <u>ME</u>   | RY                | VREN    | Q                       | T     | R        | D       | E       | L    | V    | NP    | N    | Q     | W    | E     | N    | F   | E   | N  | G   | L | G   | T | F | Y | F | L   | F | V | A | G | H | F   | N | G | N | V | Q | A |   |   |   |   |   |   |   |   |
| H6   |  | <u>QADE</u> | <u>MI</u>   | RY                | I       | E                       | E     | N        | Q       | T       | R    | D    | E     | K    | I     | N    | S     | N    | K   | W   | E  | S   | F | D   | E | K | V | K | D   | F | N | L | F | V | S   | S | F | F | K | G | N | F | K | N |   |   |   |   |   |
| H7   |  | <u>QADE</u> | <u>I</u>    | RY                | I       | E                       | E     | N        | K       | E       | R    | D    | A     | R    | L     | NP   | N     | Q    | W   | K   | V  | F   | D | E   | S | V | T | H | F   | R | F | A | F | I | SGS | F | T | G | F | K | D |   |   |   |   |   |   |   |   |
| H8   |  | <u>QADE</u> | <u>MI</u>   | RY                | I       | E                       | D     | N        | K       | R       | R    | D    | E     | N    | R     | NP   | I     | K    | W   | E   | A  | F   | P | D   | T | I | P | E | F   | Y | F | M | W | S | S   | K | F | I | G | K | F | Q | E |   |   |   |   |   |   |
| H9   |  | <u>QADE</u> | <u>MI</u>   | RY                | I       | Q                       | E     | N        | Q       | S       | R    | D    | E     | K    | L     | NP   | N     | K    | W   | E   | N  | F   | E | E   | E | T | S | K | F   | N | L | F | I | S | S   | K | F | I | S | G | F | K | K |   |   |   |   |   |   |
| H10  |  | <u>QADE</u> | <u>MI</u>   | RY                | I       | E                       | D     | N        | K       | R       | D    | P    | S     | R    | N     | ST   | K     | W    | E   | H   | F  | P   | T | S   | I | N | N | F | Y   | F | L | W | S | S | V   | F | V | N | K | F | H | E |   |   |   |   |   |   |   |
|      |  | 540         | 550         | 560               | 570     | 579                     |       |          |         |         |      |      |       |      |       |      |       |      |     |     |    |     |   |     |   |   |   |   |     |   |   |   |   |   |     |   |   |   |   |   |   |   |   |   |   |   |   |   |   |
| FokI |  | QL          | TRLNH       | ITNCN             | GAVLS   | VEEL                    | LL    | I        | GGEM    | I       | KAG  | TL   | LT    | LE   | EV    | RR   | K     | F    | N   | NGE | I  | N   | F |     |   |   |   |   |     |   |   |   |   |   |     |   |   |   |   |   |   |   |   |   |   |   |   |   |   |
| H1   |  | QL          | ARVSN       | LTKRK             | GAVLS   | VEQL                    | LL    | L        | GGEK    | I       | KDG  | SL   | LT    | LE   | DV    | G    | D     | K    | F   | N   | D  | E   | I | I   | F |   |   |   |     |   |   |   |   |   |     |   |   |   |   |   |   |   |   |   |   |   |   |   |   |
| H2   |  | QL          | ERIS        | IDT               | GGALS   | VEHL                    | LL    | L        | GAEY    | I       | KRG  | IL   | TL    | LY   | DF    | K    | N     | S    | F   | L   | N  | K   | E | I   | Q | F |   |   |     |   |   |   |   |   |     |   |   |   |   |   |   |   |   |   |   |   |   |   |   |
| H3   |  | QL          | QRIS        | MS                | TGI     | KGGA                    | I     | G        | VEHL    | LL      | L    | CAEY | Y     | K    | RG    | I    | L     | SHQ  | D   | I   | R  | S   | F | K   | N | A | E | I | E   | F |   |   |   |   |     |   |   |   |   |   |   |   |   |   |   |   |   |   |   |
| H4   |  | QL          | RRLS        | MT                | TGVN    | GS                      | AVN   | V        | N       | LL      | L    | GAE  | K     | I    | RS    | G    | E     | M    | T   | I   | E  | E   | L | R   | A | M | F | N | N   | S | E | - | - |   |     |   |   |   |   |   |   |   |   |   |   |   |   |   |   |
| H5   |  | QL          | ERIS        | R                 | NT      | GV                      | L     | GAA      | A       | S       | I    | S    | Q     | LL   | L     | L    | A     | D    | A   | I   | R  | G   | R | M   | D | R | E | R | L   | R | - | - | - | - | -   | - | - | - | - |   |   |   |   |   |   |   |   |   |   |
| H6   |  | N           | L           | K                 | H       | I                       | A     | N        | R       | T       | GVN  | G    | A     | I    | N     | V    | N     | L    | L   | Y   | F  | A   | E | E   | L | K | A | G | R   | I | S | Y | L | D | S   | F | K | M | Y | N | D | E | I | - | - |   |   |   |   |
| H7   |  | R           | I           | E                 | L       | I                       | S     | M        | R       | S       | G    | I    | C     | G    | A     | A    | V     | N    | S   | V   | N  | L   | L | L   | M | A | E | L | K   | S | G | R | L | D | Y   | E | E | W | F | Q | Y | F | D | N | D | E | I | S | F |
| H8   |  | Q           | L           | D                 | Y       | T                       | S     | N        | E       | T       | Q    | I    | K     | G    | A     | L    | N     | V    | E   | Q   | L  | L   | G | A   | D | L | V | L | K   | G | Q | L | H | I | S   | D | L | P | S | Y | F | Q | N | D | E | I | E | F |   |
| H9   |  | N           | L           | Q                 | Y       | I                       | A     | D        | R       | T       | GVN  | G    | A     | I    | N     | V    | N     | L    | L   | C   | F  | A   | E | M   | L | K | S | G | K   | L | E | Y | N | D | F   | F | N | Q | Y | N | D | E | I | - | - |   |   |   |   |
| H10  |  | Q           | L           | S                 | Y       | T                       | A     | Q        | E       | T       | Q    | T    | V     | G    | A     | A    | L     | S    | V   | E   | Q  | L   | L | G   | A | D | S | V | L   | K | G | N | L | T | T   | E | K | F | I | D | S | F | K | N | Q | E | I | V | F |

**Supplementary Table 2.** Alignment of FokI cleavage domain and homologous sequences (H1 through H10)-identified via a protein BLAST search of the FokI cleavage domain sequence. Black boxes highlight positions that are predicted to lie within 10 Å of the DNA backbone, while blue shading corresponds to the degree of residue conservation across the homologues. Red letters indicate alternative amino acids that were tested for activity and specificity in a large-scale mutational scan of DNA-proximal positions in a model of DNA-bound FokI<sup>18</sup>. Underlines highlight substitutions that were previously tested in our initial screen (i.e. in **figure 1** and **supplementary table 1**). Active site positions are indicated by a caret (^).

| FokI variant |      | Screening results: ZFN-L context |       |       |      |      |              | Screening results: ZFN-R context |      |       |      |       |              |
|--------------|------|----------------------------------|-------|-------|------|------|--------------|----------------------------------|------|-------|------|-------|--------------|
| Identity     | Note | % indels                         |       |       |      |      | on:off ratio | % indels                         |      |       |      |       | on:off ratio |
|              |      | AAVS1                            | OT1   | OT2   | OT3  | OT4  |              | AAVS1                            | OT1  | OT2   | OT3  | OT4   |              |
| 1            | 2    | 3                                | 4     | 5     | 6    | 7    | 8            | 9                                | 10   | 11    | 12   | 13    | 14           |
| < parent >   |      | 47.56                            | 2.63  | 9.72  | 2.84 | 2.46 | 2.7          | 58.80                            | 2.75 | 10.30 | 3.36 | 2.90  | 3.0          |
| < parent >   |      | 49.08                            | 3.09  | 11.10 | 3.71 | 3.06 | 2.3          |                                  |      |       |      |       |              |
| Q481H        | (2)  | 67.73                            | 6.96  | 14.54 | 4.37 | 0.32 | 2.6          | 69.52                            | 0.12 | 6.10  | 1.41 | 6.52  | 4.9          |
| S418P        |      | 67.64                            | 11.36 | 19.29 | 5.53 | 3.85 | 1.7          | 74.02                            | 3.16 | 17.76 | 3.61 | 8.51  | 2.2          |
| L424F        |      | 67.38                            | 10.08 | 20.09 | 6.00 | 4.01 | 1.7          | 73.65                            | 5.78 | 23.87 | 6.31 | 12.31 | 1.5          |
| N417D        | (1)  | 67.23                            | 5.20  | 17.94 | 5.03 | 3.71 | 2.1          | 73.10                            | 2.74 | 16.32 | 3.50 | 5.59  | 2.6          |
| P478S        |      | 63.62                            | 0.62  | 14.02 | 2.98 | 4.36 | 2.9          | 64.26                            | 1.52 | 5.11  | 2.45 | 1.40  | 6.1          |
| M426I        |      | 61.70                            | 2.74  | 16.65 | 4.59 | 3.84 | 2.2          | 63.92                            | 2.71 | 9.92  | 3.45 | 2.36  | 3.5          |
| G480S        |      | 61.29                            | 2.99  | 14.12 | 4.03 | 6.03 | 2.3          | 65.65                            | 4.90 | 10.79 | 3.14 | 2.04  | 3.1          |
| G522S        |      | 60.02                            | 2.23  | 12.86 | 3.29 | 3.27 | 2.8          | 63.97                            | 3.37 | 12.37 | 3.47 | 2.21  | 3.0          |
| N476D        | (1)  | 59.33                            | 0.06  | 0.13  | 0.17 | 0.10 | 128.7        | 28.98                            | 0.04 | 0.12  | 0.08 | 0.05  | 97.9         |
| I423L        |      | 57.80                            | 2.48  | 15.54 | 3.29 | 3.51 | 2.3          | 66.91                            | 4.37 | 13.71 | 4.47 | 3.16  | 2.6          |
| T419S        |      | 56.92                            | 3.66  | 11.83 | 3.51 | 2.26 | 2.7          | 66.12                            | 2.63 | 13.56 | 3.54 | 3.41  | 2.9          |
| N476S        | (2)  | 55.45                            | 2.55  | 10.94 | 3.65 | 2.18 | 2.9          | 59.29                            | 1.51 | 8.93  | 2.82 | 2.96  | 3.7          |
| T419K        |      | 54.75                            | 3.49  | 12.34 | 3.64 | 2.83 | 2.5          | 63.65                            | 3.82 | 16.14 | 4.06 | 4.22  | 2.3          |
| Q481E        | (1)  | 53.31                            | 0.11  | 0.11  | 0.21 | 0.05 | 110.9        | 65.72                            | 0.07 | 0.28  | 0.06 | 0.11  | 126.0        |
| Y528F        |      | 52.40                            | 3.52  | 12.72 | 3.03 | 2.79 | 2.4          | 57.87                            | 2.17 | 8.88  | 2.83 | 2.86  | 3.5          |
| Q531R        | (2)  | 50.98                            | 0.30  | 1.64  | 0.48 | 0.39 | 18.1         | 56.70                            | 1.28 | 1.99  | 2.44 | 0.62  | 9.0          |
| D421S        |      | 50.44                            | 1.73  | 16.11 | 2.46 | 6.35 | 1.9          | 51.41                            | 7.67 | 10.28 | 3.19 | 2.50  | 2.2          |
| A530K        |      | 46.55                            | 1.31  | 6.55  | 1.71 | 1.50 | 4.2          | 60.15                            | 1.26 | 3.86  | 1.87 | 0.86  | 7.7          |
| S418D        |      | 46.39                            | 0.14  | 0.29  | 0.34 | 0.16 | 49.7         | 58.61                            | 0.20 | 0.57  | 0.15 | 0.16  | 54.4         |
| S472K        |      | 44.07                            | 1.36  | 2.77  | 1.45 | 0.54 | 7.2          | 54.49                            | 0.99 | 6.10  | 1.93 | 1.66  | 5.1          |
| H523F        |      | 42.63                            | 2.12  | 14.68 | 2.27 | 4.62 | 1.8          | 53.03                            | 5.28 | 9.32  | 3.38 | 2.74  | 2.6          |
| A530E        |      | 41.94                            | 0.57  | 3.37  | 1.18 | 0.85 | 7.0          | 58.94                            | 3.18 | 9.65  | 4.82 | 2.87  | 2.9          |
| N527D        | (1)  | 41.63                            | 0.22  | 1.13  | 0.68 | 0.11 | 19.6         | 52.34                            | 0.56 | 1.75  | 1.24 | 0.59  | 12.7         |
| I479T        |      | 41.42                            | 0.15  | 0.09  | 0.06 | 0.11 | 99.4         | 59.75                            | 0.22 | 0.55  | 0.87 | 0.10  | 34.5         |
| T419Y        |      | 39.15                            | 1.83  | 6.93  | 2.27 | 1.74 | 3.1          | 42.35                            | 1.45 | 4.81  | 1.68 | 1.20  | 4.6          |
| D421N        |      | 39.03                            | 1.77  | 13.33 | 2.41 | 5.30 | 1.7          | 39.41                            | 6.27 | 8.14  | 2.59 | 1.84  | 2.1          |
| I414L        |      | 37.57                            | 2.12  | 4.36  | 2.24 | 1.18 | 3.8          | 51.17                            | 1.42 | 9.11  | 2.80 | 2.95  | 3.1          |
| E484Q        |      | 37.48                            | 1.93  | 11.64 | 1.39 | 4.08 | 2.0          | 51.22                            | 8.22 | 10.35 | 2.39 | 2.70  | 2.2          |
| Q420A        | (2)  | 37.22                            | 1.07  | 9.61  | 1.81 | 2.61 | 2.5          | 44.62                            | 2.87 | 4.92  | 2.81 | 1.17  | 3.8          |
| S446G        |      | 35.42                            | 1.52  | 3.07  | 1.75 | 1.09 | 4.8          | 48.86                            | 1.13 | 4.31  | 1.13 | 1.59  | 6.0          |
| Q481N        | (2)  | 35.13                            | 0.59  | 3.37  | 1.56 | 0.35 | 6.0          | 35.21                            | 0.10 | 2.64  | 0.83 | 1.15  | 7.5          |
| S418G        |      | 32.76                            | 0.81  | 11.10 | 1.11 | 4.23 | 1.9          | 41.59                            | 5.48 | 4.18  | 2.79 | 1.37  | 3.0          |
| K441E        | (2)  | 32.05                            | 2.59  | 9.23  | 2.29 | 2.31 | 2.0          | 45.72                            | 5.21 | 8.60  | 3.29 | 2.64  | 2.3          |
| N417S        | (2)  | 29.91                            | 1.11  | 7.81  | 1.56 | 2.17 | 2.4          | 33.80                            | 2.65 | 4.26  | 2.30 | 1.26  | 3.2          |
| G473D        |      | 29.64                            | 1.15  | 6.26  | 1.52 | 2.12 | 2.7          | 41.00                            | 3.40 | 7.64  | 2.26 | 1.52  | 2.8          |
| G473K        |      | 25.08                            | 0.92  | 5.70  | 1.42 | 0.70 | 2.9          | 32.02                            | 2.10 | 2.67  | 2.03 | 1.01  | 4.1          |
| N527G        | (2)  | 23.28                            | 0.84  | 2.93  | 1.27 | 1.50 | 3.6          | 28.13                            | 0.55 | 2.49  | 1.59 | 0.78  | 5.2          |
| K529E        | (2)  | 22.98                            | 0.58  | 2.77  | 1.51 | 0.54 | 4.3          | 30.72                            | 1.05 | 3.64  | 1.62 | 1.22  | 4.1          |
| P501S        |      | 20.02                            | 1.60  | 4.32  | 1.47 | 1.17 | 2.3          | 30.29                            | 0.79 | 3.83  | 1.57 | 1.02  | 4.2          |
| H442R        |      | 18.30                            | 0.63  | 0.45  | 0.47 | 0.14 | 10.8         | 32.85                            | 0.14 | 2.18  | 0.51 | 0.62  | 9.5          |
| Q531N        | (2)  | 16.28                            | 0.26  | 1.30  | 0.53 | 0.37 | 6.6          | 17.46                            | 1.25 | 2.00  | 1.49 | 0.46  | 3.4          |
| I423D        |      | 14.05                            | 0.39  | 1.84  | 0.75 | 0.57 | 4.0          | 29.67                            | 0.93 | 2.84  | 1.08 | 0.66  | 5.4          |
| N527K        | (2)  | 13.62                            | 0.78  | 2.56  | 0.89 | 0.23 | 3.1          | 20.69                            | 0.72 | 1.81  | 1.02 | 0.63  | 4.9          |
| K441L        | (2)  | 13.37                            | 0.74  | 2.77  | 0.80 | 0.95 | 2.5          | 23.57                            | 1.55 | 2.99  | 1.40 | 0.91  | 3.4          |
| E425Q        |      | 8.67                             | 0.10  | 0.07  | 0.05 | 0.07 | 30.3         | 33.35                            | 0.05 | 0.09  | 0.08 | 0.08  | 110.0        |
| K441D        | (2)  | 5.87                             | 0.35  | 0.94  | 0.38 | 0.24 | 3.1          | 10.66                            | 0.84 | 0.80  | 0.58 | 0.40  | 4.1          |
| G445E        |      | 2.63                             | 0.21  | 0.15  | 0.20 | 0.06 | 4.2          | 5.57                             | 0.16 | 0.31  | 0.25 | 0.24  | 5.8          |
| T468N        |      | 0.19                             | 0.05  | 0.06  | 0.14 | 0.07 | 0.6          | 0.94                             | 0.02 | 0.06  | 0.05 | 0.07  | 4.8          |

Notes: (1) Variant previously tested in initial screen. See Supplementary Table 1.

(2) Position previously tested in initial screen, but using a different residue substitution. See Supplementary Table 1.

**Supplementary Table 3.** On and off-target activity of variants of the AAVS1 ZFN dimer bearing single-residue substitutions in the FokI cleavage domain of either the left or right ZFN (ZFN-L or ZFN-R). For this study, the queried positions were chosen based on proximity to the DNA backbone (generally within 10 Å) in a model of a FokI-DNA complex. Residue substitutions were biased towards variations observed in FokI homologues (see **Supplementary Table**

2). ZFNs were delivered to human K562 cells via mRNA nucleofection, followed by genomic DNA isolation at day 3 and deep sequencing analysis for indels at the intended target or four off-target sites. Values represent individual measurements. Columns 3-8 summarize results obtained for screening each variant in the ZFN-L context (i.e. each tested dimer consisted of a ZFN-L variant bearing the indicated substitution paired with an unmodified ZFN-R). Column 3 provides % indels measured at the intended target, with columns 4-7 indicating % indels at four previously known off-target sites. Entries are provided in order of decreasing on-target % indels (column 3) with the exception that the parent, unmodified dimer is listed at top. Column 8 lists the on:off-target indel ratio (= % on-target indels / total off-target indels). To help highlight relative signal intensities table values are embedded in heat maps (green – on target indels; red – off-target indels; blue – on:off ratio). Arrows highlight variants that retain substantial on-target activity (>80% of parent) and exhibit a >3-fold increase in on:off ratio relative to parent, and moreover involve new positions that were not tested in the initial screen (see column 2 notes and **Supplementary Table 1**). Columns 9-14 summarize results obtained for screening each variant in the ZFN-R context. It can be seen by inspection of heat map intensities that results in the ZFN-L and ZFN-R contexts are broadly concordant. Note that three of these variants (S418P, K441E, Q481H) were previously reported as providing enhanced cleavage activity but without any characterized specificity improvement (*J. Mol. Biol.*, Guo, Gaj & Barbas, 2010).

| FokI domain variant | ZFN-L <sub>variant</sub> + ZFN-R <sub>variant</sub> |       |       |       |       |            | ZFN-L <sub>variant</sub> |      |       |      |      |            | ZFN-R <sub>variant</sub> |      |       |      |      |            |
|---------------------|-----------------------------------------------------|-------|-------|-------|-------|------------|--------------------------|------|-------|------|------|------------|--------------------------|------|-------|------|------|------------|
|                     | % indels                                            |       |       |       |       |            | % indels                 |      |       |      |      |            | % indels                 |      |       |      |      |            |
|                     | ON                                                  | OT1   | OT2   | OT3   | OT4   | normalized | ON                       | OT1  | OT2   | OT3  | OT4  | normalized | ON                       | OT1  | OT2   | OT3  | OT4  | normalized |
| 1                   | 2                                                   | 3     | 4     | 5     | 6     | 7          | 8                        | 9    | 10    | 11   | 12   | 13         | 14                       | 15   | 16    | 17   | 18   | 19         |
| parent - full dose  | 57.8                                                | 1.31  | 9.73  | 1.67  | 1.20  | 1.1        | 57.8                     | 1.31 | 9.73  | 1.67 | 1.20 | 1.1        | 57.8                     | 1.31 | 9.73  | 1.67 | 1.20 | 1.1        |
|                     | 55.4                                                | 1.27  | 9.06  | 1.38  | .98   | 1.2        | 55.4                     | 1.27 | 9.06  | 1.38 | .98  | 1.2        | 55.4                     | 1.27 | 9.06  | 1.38 | .98  | 1.2        |
|                     | 60.6                                                | 1.81  | 11.83 | 1.87  | 1.39  | 1.0        | 60.6                     | 1.81 | 11.83 | 1.87 | 1.39 | 1.0        | 60.6                     | 1.81 | 11.83 | 1.87 | 1.39 | 1.0        |
|                     | 55.4                                                | 2.15  | 13.05 | 2.26  | 2.05  | .8         | 55.4                     | 2.15 | 13.05 | 2.26 | 2.05 | .8         | 55.4                     | 2.15 | 13.05 | 2.26 | 2.05 | .8         |
| parent - half dose  | 34.1                                                | .23   | 2.50  | .31   | .12   | 2.9        | 34.1                     | .23  | 2.50  | .31  | .12  | 2.9        | 34.1                     | .23  | 2.50  | .31  | .12  | 2.9        |
|                     | 36.7                                                | .19   | 2.67  | .41   | .23   | 2.8        | 36.7                     | .19  | 2.67  | .41  | .23  | 2.8        | 36.7                     | .19  | 2.67  | .41  | .23  | 2.8        |
|                     | 42.1                                                | .32   | 3.72  | .51   | .30   | 2.3        | 42.1                     | .32  | 3.72  | .51  | .30  | 2.3        | 42.1                     | .32  | 3.72  | .51  | .30  | 2.3        |
|                     | 40.2                                                | .47   | 3.17  | .57   | .32   | 2.4        | 40.2                     | .47  | 3.17  | .57  | .32  | 2.4        | 40.2                     | .47  | 3.17  | .57  | .32  | 2.4        |
| R416H               | 94.2                                                | 3.09  | 18.51 | 3.36  | 2.33  | .9         | 82.8                     | 4.48 | 6.04  | 1.81 | .31  | 1.8        | 73.8                     | .52  | 9.86  | .91  | 2.96 | 1.4        |
| R416E               | 91.1                                                | .11   | .41   | .19   | .07   | 31.3       | 76.2                     | 1.83 | .49   | .24  | .05  | 7.8        | 68.3                     | .03  | 1.58  | .16  | .62  | 7.6        |
| R416N               | 89.3                                                | .16   | .55   | .35   | .12   | 20.4       | 74.8                     | 1.12 | .83   | .59  | .11  | 7.5        | 69.5                     | .07  | 2.49  | .24  | .75  | 5.2        |
| R416Q               | 88.2                                                | 1.10  | 7.54  | 1.66  | .73   | 2.1        | 76.8                     | 3.09 | 3.23  | 1.30 | .25  | 2.6        | 69.0                     | .13  | 6.21  | .44  | 2.08 | 2.1        |
| R416F               | 87.1                                                | .57   | 2.62  | .81   | .38   | 5.3        | 75.2                     | 2.09 | 3.87  | 1.24 | .24  | 2.7        | 63.3                     | .33  | 3.94  | .38  | 1.09 | 3.0        |
| R416Y               | 85.9                                                | 24.08 | 62.16 | 16.89 | 17.97 | .2         | 81.4                     | 7.28 | 20.16 | 3.53 | 1.44 | .7         | 72.4                     | 1.70 | 20.12 | 2.41 | 3.83 | .7         |
| R416S               | 71.9                                                | .22   | .61   | .28   | .13   | 15.6       | 58.7                     | .85  | .61   | .72  | .06  | 7.0        | 61.7                     | .27  | 4.36  | .32  | .94  | 2.8        |
| R416D               | 70.6                                                | .04   | .04   | .05   | .03   | 122.4      | 52.2                     | .61  | .12   | .16  | .02  | 15.4       | 44.6                     | .05  | .27   | .04  | .12  | 24.2       |
| R416M               | 69.3                                                | .47   | 3.99  | .85   | .47   | 3.2        | 60.3                     | 1.09 | 2.91  | .99  | .29  | 3.1        | 53.5                     | .45  | 5.09  | .64  | .93  | 2.0        |
| R416C               | 68.4                                                | .34   | 2.75  | .72   | .29   | 4.5        | 61.5                     | 1.31 | 2.50  | 1.08 | .27  | 3.2        | 54.0                     | .35  | 5.09  | .41  | .94  | 2.1        |
| R416A               | 67.1                                                | .16   | 1.14  | .37   | .12   | 10.0       | 59.2                     | .80  | 1.32  | .70  | .22  | 5.2        | 54.3                     | .13  | 3.73  | .25  | .57  | 3.1        |
| R416T               | 62.1                                                | .50   | 3.51  | .99   | .43   | 3.1        | 49.5                     | .93  | 1.82  | .81  | .15  | 3.6        | 55.8                     | .31  | 6.64  | .72  | 1.18 | 1.7        |
| R416G               | 47.9                                                | .08   | .47   | .17   | .12   | 15.3       | 48.3                     | .90  | .66   | .71  | .15  | 5.3        | 49.0                     | .12  | 2.04  | .24  | .55  | 4.4        |
| R416L               | 44.9                                                | .50   | 3.13  | .74   | .48   | 2.5        | 51.9                     | 1.46 | 4.62  | 1.22 | .51  | 1.8        | 46.7                     | .47  | 6.32  | .78  | .87  | 1.5        |
| R416W               | 39.2                                                | .21   | 1.20  | .36   | .16   | 5.4        | 54.9                     | 1.09 | 2.33  | 1.02 | .36  | 3.1        | 41.2                     | .32  | 3.67  | .40  | .49  | 2.3        |
| R416V               | 34.9                                                | 1.08  | 4.49  | 1.14  | .86   | 1.2        | 47.5                     | 1.70 | 7.94  | 1.36 | .94  | 1.1        | 40.1                     | .79  | 4.97  | 1.04 | .99  | 1.4        |
| R416I               | 13.0                                                | .30   | 1.02  | .33   | .23   | 1.9        | 28.5                     | .68  | 3.86  | .71  | .50  | 1.3        | 23.4                     | .38  | 2.91  | .61  | .44  | 1.4        |
| R416K               | 11.5                                                | .12   | .91   | .23   | .11   | 2.2        | 18.1                     | .33  | .92   | .37  | .15  | 2.7        | 25.6                     | .31  | 1.96  | .64  | .30  | 2.1        |
| R416P               | .1                                                  | .01   | .01   | .01   | .03   | .5         | 2.1                      | .03  | .08   | .02  | .06  | 2.9        | 1.8                      | .02  | .05   | .02  | .06  | 3.2        |
| K525T               | 84.7                                                | .07   | .68   | .21   | .21   | 19.3       | 74.6                     | .48  | 2.75  | .94  | .44  | 4.3        | 66.7                     | .24  | 5.06  | .32  | .45  | 2.9        |
| K525V               | 83.3                                                | .04   | .48   | .06   | .09   | 32.9       | 72.6                     | .36  | 2.82  | .58  | .40  | 4.7        | 58.7                     | .18  | 2.62  | .18  | .18  | 5.0        |
| K525C               | 82.1                                                | .12   | .55   | .12   | .19   | 22.2       | 74.3                     | .48  | 2.89  | .80  | .51  | 4.3        | 62.9                     | .13  | 3.74  | .31  | .37  | 3.7        |
| K525I               | 80.4                                                | .04   | .51   | .13   | .12   | 26.9       | 68.2                     | .28  | 2.29  | .47  | .61  | 5.0        | 57.3                     | .16  | 2.40  | .28  | .24  | 5.0        |
| K525S               | 77.7                                                | .02   | .11   | .06   | .05   | 84.7       | 65.8                     | .22  | .53   | .23  | .15  | 15.6       | 63.2                     | .10  | 1.06  | .12  | .33  | 10.5       |
| K525A               | 73.8                                                | .01   | .07   | .04   | .03   | 132.2      | 63.3                     | .12  | .30   | .14  | .11  | 25.3       | 61.2                     | .09  | .92   | .13  | .21  | 12.1       |
| K525G               | 56.5                                                | .04   | .07   | .04   | .02   | 95.9       | 54.2                     | .25  | .34   | .21  | .08  | 16.6       | 52.9                     | .04  | 1.09  | .13  | .34  | 8.9        |
| K525R               | 53.6                                                | 2.18  | 14.69 | 1.97  | 2.52  | .7         | 51.1                     | 1.17 | 10.86 | 1.35 | 1.93 | .9         | 52.3                     | 2.04 | 9.51  | 1.57 | 1.18 | 1.0        |
| K525Q               | 42.0                                                | .03   | .10   | .07   | .04   | 45.3       | 47.1                     | .31  | .48   | .34  | .11  | 10.2       | 52.6                     | .09  | 1.55  | .12  | .26  | 6.9        |
| K525N               | 36.5                                                | .04   | .23   | .05   | .04   | 27.5       | 41.8                     | .14  | .56   | .30  | .21  | 9.3        | 44.7                     | .15  | 1.61  | .25  | .27  | 5.2        |
| K525H               | 36.3                                                | .04   | .27   | .06   | .07   | 21.7       | 41.1                     | .17  | .79   | .24  | .28  | 7.4        | 41.3                     | .29  | 2.61  | .34  | .24  | 3.2        |
| K525M               | 27.6                                                | .02   | .09   | .04   | .03   | 42.0       | 32.8                     | .08  | .25   | .13  | .10  | 15.7       | 46.6                     | .15  | 1.29  | .17  | .19  | 7.0        |
| K525Y               | 25.8                                                | .07   | .83   | .11   | .11   | 6.2        | 37.8                     | .14  | 2.21  | .21  | .82  | 3.0        | 35.1                     | .70  | 1.42  | .41  | .15  | 3.5        |
| K525E               | 23.6                                                | .01   | .02   | .03   | .02   | 77.1       | 64.3                     | .08  | .07   | .10  | .10  | 50.5       | 52.5                     | .02  | .24   | .06  | .07  | 35.6       |
| K525L               | 14.3                                                | .01   | .02   | .04   | .04   | 32.0       | 27.1                     | .09  | .48   | .21  | .20  | 7.5        | 30.3                     | .06  | .79   | .15  | .07  | 7.5        |
| K525F               | 12.7                                                | .07   | .28   | .08   | .04   | 7.2        | 23.1                     | .04  | 1.13  | .18  | .35  | 3.7        | 25.3                     | .58  | .74   | .34  | .16  | 3.7        |
| K525W               | 8.6                                                 | .02   | .10   | .03   | .05   | 11.8       | 18.3                     | .06  | .88   | .11  | .34  | 3.5        | 17.8                     | .09  | .52   | .21  | .05  | 5.5        |
| K525D               | 5.0                                                 | .01   | .02   | .02   | .04   | 15.2       | 41.8                     | .04  | .11   | .03  | .07  | 43.8       | 36.2                     | .00  | .14   | .03  | .04  | 45.2       |
| K525P               | .0                                                  | .03   | .03   | .02   | .02   | .0         | 8.5                      | .03  | .02   | .02  | .03  | 24.7       | 2.4                      | .02  | .04   | .01  | .03  | 6.7        |
| GFP                 | .0                                                  | .02   | .01   | .03   | .03   | NA         | .0                       | .02  | .01   | .03  | .03  | NA         | .0                       | .02  | .01   | .03  | .03  | NA         |
| GFP                 | .0                                                  | .01   | .04   | .03   | .02   | NA         | .0                       | .01  | .04   | .03  | .02  | NA         | .0                       | .01  | .04   | .03  | .02  | NA         |

**Supplementary Table 4.** On and off-target activity of variants of the AAVS1 ZFN dimer bearing each single-residue substitution of R416 and K525. Each variant was tested as a dimer in which both ZFN-L and ZFN-R bore the indicated substitution (columns 2-7), in addition to being tested in ZFN-L or ZFN-R alone (columns 8-13 and 14-19). ZFNs were delivered to human K562 cells via mRNA nucleofection, followed by genomic DNA isolation at day 3 and deep sequencing analysis for indels at the intended target or four off-target sites. Values represent individual measurements. Columns 2, 8 and 14 provide % indels measured at the intended target, while columns 3-6, 9-12 and 15-18 indicate % indels at four previously known off-target sites. For each tested position, entries are provided in order of decreasing on-target % indels in column 3, with the exception that full-dose and half-dose control studies of the parent, unmodified dimer are listed at top. Columns 7, 13 and 19 list the normalized on:off-target indel ratio (= % on-target indels / total off-target indels, normalized to value for the full-dose parent samples). To highlight relative signal intensities table values are embedded in heat maps (green – on target indels; red – off-target indels; blue – on:off ratio). Arrows highlight variants manifesting especially high levels of activity and specificity that were characterized in followup studies, see **Supplementary Table 9** and **Table 1**.

| FokI domain variant | ZFN-L <sub>variant</sub> + ZFN-R <sub>variant</sub> |      |       |      |      |            | ZFN-L <sub>variant</sub> |       |       |      |      |            | ZFN-R <sub>variant</sub> |      |       |      |      |            |
|---------------------|-----------------------------------------------------|------|-------|------|------|------------|--------------------------|-------|-------|------|------|------------|--------------------------|------|-------|------|------|------------|
|                     | % indels                                            |      |       |      |      | (on/Σoff)  | % indels                 |       |       |      |      | (on/Σoff)  | % indels                 |      |       |      |      | (on/Σoff)  |
|                     | ON                                                  | OT1  | OT2   | OT3  | OT4  | normalized | ON                       | OT1   | OT2   | OT3  | OT4  | normalized | ON                       | OT1  | OT2   | OT3  | OT4  | normalized |
| parent              | 63.6                                                | 3.50 | 15.40 | 3.29 | 3.11 | 1.0        | 63.6                     | 3.50  | 15.40 | 3.29 | 3.11 | 1.0        | 63.6                     | 3.50 | 15.40 | 3.29 | 3.11 | 1.0        |
| - full dose         | 63.1                                                | 3.50 | 18.77 | 3.63 | 3.01 | .8         | 63.1                     | 3.50  | 18.77 | 3.63 | 3.01 | .8         | 63.1                     | 3.50 | 18.77 | 3.63 | 3.01 | .8         |
|                     | 60.0                                                | 2.50 | 11.17 | 2.92 | 2.79 | 1.2        | 60.0                     | 2.50  | 11.17 | 2.92 | 2.79 | 1.2        | 60.0                     | 2.50 | 11.17 | 2.92 | 2.79 | 1.2        |
|                     | 56.7                                                | 2.05 | 13.75 | 2.62 | 2.28 | 1.0        | 56.7                     | 2.05  | 13.75 | 2.62 | 2.28 | 1.0        | 56.7                     | 2.05 | 13.75 | 2.62 | 2.28 | 1.0        |
| parent              | 43.5                                                | .58  | 6.13  | .98  | .58  | 2.0        | 43.5                     | .58   | 6.13  | .98  | .58  | 2.0        | 43.5                     | .58  | 6.13  | .98  | .58  | 2.0        |
| - half dose         | 45.1                                                | .81  | 6.62  | .77  | .67  | 1.9        | 45.1                     | .81   | 6.62  | .77  | .67  | 1.9        | 45.1                     | .81  | 6.62  | .77  | .67  | 1.9        |
|                     | 36.5                                                | .31  | 3.47  | .48  | .30  | 3.0        | 36.5                     | .31   | 3.47  | .48  | .30  | 3.0        | 36.5                     | .31  | 3.47  | .48  | .30  | 3.0        |
|                     | 34.7                                                | .28  | 3.72  | .68  | .43  | 2.6        | 34.7                     | .28   | 3.72  | .68  | .43  | 2.6        | 34.7                     | .28  | 3.72  | .68  | .43  | 2.6        |
| S418P               | 91.5                                                | 9.89 | 35.58 | 6.21 | 8.86 | .6         | 85.9                     | 11.22 | 25.87 | 5.63 | 3.90 | .7         | 79.2                     | 3.90 | 28.77 | 3.93 | 9.53 | .7         |
| S418E               | 58.2                                                | .01  | .04   | .02  | .05  | 178.5      | 80.2                     | .20   | .52   | .31  | .16  | 25.7       | 72.5                     | .09  | .34   | .16  | .11  | 39.8       |
| S418A               | 56.4                                                | .67  | 3.20  | .90  | .57  | 4.0        | 64.9                     | 4.13  | 6.75  | 3.56 | 1.13 | 1.6        | 56.8                     | .70  | 12.20 | .94  | 1.88 | 1.4        |
| S418D               | 48.7                                                | .03  | .08   | .05  | .12  | 65.5       | 63.6                     | 1.07  | 1.90  | .93  | .51  | 5.5        | 65.2                     | .16  | 1.15  | .14  | .27  | 14.4       |
| S418N               | 44.7                                                | .90  | 8.43  | 1.34 | .95  | 1.5        | 51.1                     | 3.49  | 6.04  | 2.41 | .62  | 1.5        | 59.2                     | 1.08 | 19.05 | 1.70 | 4.67 | .8         |
| S418H               | 40.2                                                | .55  | 3.40  | .75  | .76  | 2.8        | 52.0                     | 3.38  | 6.20  | 3.05 | .97  | 1.5        | 55.6                     | 1.14 | 12.98 | 1.42 | 3.65 | 1.1        |
| S418Q               | 39.5                                                | .10  | .85   | .31  | .25  | 10.0       | 49.3                     | 1.93  | 1.33  | 1.38 | .21  | 3.9        | 55.1                     | .22  | 7.54  | .56  | 1.94 | 2.0        |
| S418K               | 34.8                                                | 1.33 | 3.16  | 1.29 | .92  | 2.0        | 47.0                     | 4.22  | 2.90  | 3.37 | 1.19 | 1.5        | 52.0                     | 1.58 | 17.69 | 1.17 | 3.44 | .8         |
| S418T               | 34.6                                                | .07  | .24   | .14  | .09  | 24.3       | 41.9                     | .58   | .63   | .56  | .08  | 8.6        | 57.2                     | .27  | 6.33  | .54  | 1.25 | 2.6        |
| S418R               | 29.5                                                | 3.22 | 5.45  | 1.52 | 2.05 | .9         | 43.7                     | 6.46  | 3.65  | 3.11 | .68  | 1.2        | 45.8                     | 2.31 | 19.09 | 1.60 | 5.19 | .6         |
| S418G               | 27.0                                                | 2.45 | 9.45  | 1.64 | 1.93 | .7         | 41.8                     | 1.22  | 17.17 | 1.15 | 4.53 | .7         | 44.8                     | 7.82 | 8.06  | 3.45 | 1.44 | .8         |
| S418C               | 24.4                                                | .21  | .74   | .35  | .28  | 5.9        | 48.5                     | 2.17  | 6.15  | 3.19 | 1.45 | 1.4        | 42.7                     | 1.14 | 6.97  | 1.05 | 1.26 | 1.6        |
| S418V               | 18.7                                                | .03  | .03   | .05  | .11  | 33.3       | 33.0                     | .34   | .21   | .27  | .04  | 14.7       | 44.4                     | .04  | .40   | .10  | .23  | 21.9       |
| S418M               | 8.9                                                 | .05  | .09   | .06  | .10  | 11.4       | 24.0                     | .50   | .64   | .67  | .13  | 4.7        | 30.9                     | .19  | 1.55  | .17  | .46  | 5.0        |
| S418Y               | 7.3                                                 | .09  | .33   | .06  | .12  | 4.6        | 21.4                     | .57   | 1.68  | .72  | .34  | 2.5        | 21.7                     | .48  | 2.48  | .51  | .82  | 1.9        |
| S418W               | 6.0                                                 | .10  | .12   | .08  | .13  | 5.2        | 19.7                     | 1.00  | 1.28  | .88  | .15  | 2.3        | 18.3                     | .15  | 1.60  | .37  | .61  | 2.6        |
| S418I               | 6.0                                                 | .02  | .02   | .02  | .10  | 14.1       | 18.7                     | .18   | .11   | .14  | .03  | 15.4       | 29.8                     | .06  | .28   | .03  | .13  | 23.2       |
| S418F               | 5.2                                                 | .06  | .18   | .09  | .13  | 4.3        | 18.4                     | .52   | 6.25  | .77  | .25  | .9         | 14.9                     | .23  | 1.08  | .34  | .42  | 2.7        |
| S418L               | 1.8                                                 | .01  | .03   | .01  | .14  | 3.8        | 11.4                     | .16   | .23   | .42  | .05  | 5.1        | 10.8                     | .03  | .41   | .05  | .14  | 6.4        |
| R422K               | 78.5                                                | 2.17 | 23.05 | 3.34 | 3.98 | .9         | 72.3                     | 8.36  | 21.16 | 4.17 | 2.86 | .8         | 71.2                     | .97  | 22.19 | 3.16 | 6.13 | .8         |
| R422H               | 58.5                                                | .08  | .65   | .39  | .23  | 16.4       | 62.8                     | 1.65  | 5.04  | 2.12 | .40  | 2.6        | 63.4                     | .37  | 4.33  | .72  | 1.45 | 3.5        |
| R422Q               | 43.1                                                | .10  | .53   | .23  | .14  | 16.4       | 56.2                     | .84   | 8.88  | 2.12 | .73  | 1.7        | 60.2                     | .56  | 4.53  | 1.63 | 1.31 | 2.8        |
| R422L               | 37.7                                                | .17  | .71   | .28  | .23  | 10.3       | 53.8                     | .63   | 10.24 | 2.14 | 1.15 | 1.4        | 52.2                     | .94  | 3.79  | 1.36 | .91  | 2.8        |
| R422Y               | 37.3                                                | .08  | 1.31  | .46  | .31  | 6.6        | 53.7                     | 2.23  | 4.91  | 3.44 | .74  | 1.8        | 53.0                     | .37  | 4.80  | .74  | 1.26 | 2.8        |
| R422T               | 37.2                                                | .04  | .29   | .09  | .17  | 23.8       | 50.9                     | .76   | 4.10  | 1.53 | .31  | 2.9        | 54.6                     | .24  | 2.99  | .81  | .91  | 4.2        |
| R422S               | 32.7                                                | .04  | .15   | .20  | .20  | 20.8       | 43.7                     | .87   | 2.29  | 1.55 | .30  | 3.3        | 52.1                     | .17  | 1.55  | .63  | .90  | 6.1        |
| R422E               | 25.1                                                | .00  | .03   | .03  | .14  | 47.2       | 45.7                     | .32   | .85   | .38  | .07  | 10.7       | 49.8                     | .02  | .17   | .08  | .14  | 45.8       |
| R422V               | 23.4                                                | .02  | .18   | .06  | .14  | 21.8       | 44.6                     | .43   | 4.71  | 1.50 | .55  | 2.4        | 41.7                     | .24  | 1.61  | .52  | .30  | 5.9        |
| R422N               | 23.2                                                | .03  | .04   | .06  | .11  | 35.5       | 39.7                     | .80   | 2.03  | 1.24 | .20  | 3.5        | 46.2                     | .15  | 1.84  | .44  | .81  | 5.4        |
| R422D               | 22.0                                                | .02  | .02   | .01  | .08  | 63.1       | 40.0                     | .50   | .84   | .40  | .07  | 8.4        | 49.9                     | .03  | .25   | .05  | .28  | 31.3       |
| R422M               | 20.8                                                | .05  | .21   | .20  | .18  | 12.5       | 40.2                     | .67   | 5.14  | 1.71 | 1.00 | 1.8        | 39.5                     | .56  | 2.40  | .65  | .46  | 3.7        |
| R422F               | 20.4                                                | .03  | .69   | .30  | .16  | 6.6        | 39.3                     | 1.22  | 3.33  | 2.37 | .62  | 2.0        | 40.0                     | .20  | 2.29  | .32  | .48  | 4.6        |
| R422G               | 19.8                                                | .02  | .05   | .03  | .12  | 33.9       | 41.3                     | .43   | 1.35  | .92  | .18  | 5.4        | 40.9                     | .20  | 1.64  | .36  | .57  | 5.6        |
| R422I               | 16.9                                                | .05  | .22   | .14  | .15  | 11.6       | 35.8                     | .31   | 3.13  | 1.37 | .43  | 2.6        | 35.5                     | .31  | 1.97  | .41  | .33  | 4.5        |
| R422W               | 13.1                                                | .03  | .32   | .10  | .10  | 9.0        | 31.7                     | 1.03  | 1.43  | 1.61 | .25  | 2.8        | 33.2                     | .14  | 3.71  | .47  | .67  | 2.5        |
| R422C               | 13.0                                                | .07  | .09   | .03  | .11  | 16.3       | 29.9                     | .47   | 1.75  | .84  | .31  | 3.4        | 31.6                     | .13  | 1.22  | .31  | .34  | 6.0        |
| R422P               | 3.6                                                 | .02  | .03   | .01  | .09  | 8.9        | 15.6                     | .12   | .13   | .11  | .05  | 14.2       | 28.5                     | .02  | .20   | .03  | .06  | 35.2       |
| R422A               | 3.4                                                 | .01  | .03   | .05  | .15  | 5.4        | 4.8                      | .07   | .09   | .09  | .04  | 6.3        | 57.4                     | .24  | 2.68  | .61  | 1.20 | 4.6        |
| GFP                 | .0                                                  | .00  | .02   | .02  | .09  | NA         | .0                       | .00   | .02   | .02  | .09  | NA         | .0                       | .00  | .02   | .02  | .09  | NA         |
| GFP                 | .0                                                  | .01  | .01   | .00  | .12  | NA         | .0                       | .01   | .01   | .00  | .12  | NA         | .0                       | .01  | .01   | .00  | .12  | NA         |

**Supplementary Table 5.** On and off-target activity of variants of the AAVS1 ZFN dimer bearing each single-residue substitution of S418 and R422. For additional detail see legend to **Supplementary Table 4**.



| FokI domain variant   | ZFN-L <sub>variant</sub> + ZFN-R <sub>variant</sub> |      |      |      |      |            | ZFN-L <sub>variant</sub> |      |      |      |      |            | ZFN-R <sub>variant</sub> |      |      |      |      |            |
|-----------------------|-----------------------------------------------------|------|------|------|------|------------|--------------------------|------|------|------|------|------------|--------------------------|------|------|------|------|------------|
|                       | % indels                                            |      |      |      |      | (on/Σoff)  | % indels                 |      |      |      |      | (on/Σoff)  | % indels                 |      |      |      |      | (on/Σoff)  |
|                       | ON                                                  | OT1  | OT2  | OT3  | OT4  | normalized | ON                       | OT1  | OT2  | OT3  | OT4  | normalized | ON                       | OT1  | OT2  | OT3  | OT4  | normalized |
| 1                     | 2                                                   | 3    | 4    | 5    | 6    | 7          | 8                        | 9    | 10   | 11   | 12   | 13         | 14                       | 15   | 16   | 17   | 18   | 19         |
| parent<br>- full dose | 46.5                                                | 1.46 | 6.60 | 1.41 | 1.26 | .8         | 46.5                     | 1.46 | 6.60 | 1.41 | 1.26 | .8         | 46.5                     | 1.46 | 6.60 | 1.41 | 1.26 | .8         |
|                       | 40.1                                                | .90  | 3.57 | 1.05 | .70  | 1.2        | 40.1                     | .90  | 3.57 | 1.05 | .70  | 1.2        | 40.1                     | .90  | 3.57 | 1.05 | .70  | 1.2        |
|                       | 45.7                                                | 1.36 | 5.54 | 1.37 | 1.24 | .9         | 45.7                     | 1.36 | 5.54 | 1.37 | 1.24 | .9         | 45.7                     | 1.36 | 5.54 | 1.37 | 1.24 | .9         |
|                       | 41.2                                                | 1.04 | 3.92 | .94  | .86  | 1.1        | 41.2                     | 1.04 | 3.92 | .94  | .86  | 1.1        | 41.2                     | 1.04 | 3.92 | .94  | .86  | 1.1        |
| parent<br>- half dose | 29.2                                                | .31  | 1.82 | .26  | .31  | 2.0        | 29.2                     | .31  | 1.82 | .26  | .31  | 2.0        | 29.2                     | .31  | 1.82 | .26  | .31  | 2.0        |
|                       | 29.3                                                | .27  | ND   | .36  | .31  | 5.8        | 29.3                     | .27  | ND   | .36  | .31  | 5.8        | 29.3                     | .27  | ND   | .36  | .31  | 5.8        |
|                       | 24.6                                                | .20  | 1.06 | .19  | .17  | 2.8        | 24.6                     | .20  | 1.06 | .19  | .17  | 2.8        | 24.6                     | .20  | 1.06 | .19  | .17  | 2.8        |
|                       | 24.6                                                | .34  | 1.16 | .30  | .17  | 2.3        | 24.6                     | .34  | 1.16 | .30  | .17  | 2.3        | 24.6                     | .34  | 1.16 | .30  | .17  | 2.3        |
| I479Q                 | 53.8                                                | .04  | .03  | .07  | .04  | 56.0       | 64.2                     | .05  | .03  | .03  | .10  | 54.4       | 59.6                     | .54  | 1.32 | .77  | .05  | 4.1        |
| I479V                 | 36.6                                                | .04  | .05  | .06  | .05  | 34.0       | 49.9                     | .24  | .20  | .11  | .11  | 13.9       | 49.2                     | .18  | .48  | .32  | .25  | 7.4        |
| I479M                 | 34.7                                                | .22  | .22  | .10  | .10  | 9.9        | 41.4                     | .41  | 1.30 | .41  | .61  | 2.8        | 43.4                     | 1.33 | 2.12 | 1.35 | .19  | 1.6        |
| I479T                 | 28.7                                                | .04  | .03  | .03  | .09  | 28.5       | 45.9                     | .07  | .05  | .04  | .09  | 34.2       | 48.6                     | .06  | .44  | .50  | .08  | 8.3        |
| I479L                 | 27.7                                                | .17  | .05  | .12  | .08  | 12.4       | 39.3                     | .13  | .29  | .22  | .96  | 4.6        | 40.1                     | 2.96 | 1.91 | .90  | .20  | 1.2        |
| I479C                 | 14.1                                                | .04  | .06  | .03  | .07  | 13.0       | 32.6                     | .09  | .02  | .05  | .10  | 23.0       | 41.4                     | .17  | .51  | .27  | .05  | 7.6        |
| I479F                 | 5.1                                                 | .01  | .03  | .03  | .03  | 9.2        | 22.5                     | .04  | .02  | .03  | .11  | 20.7       | 25.1                     | .11  | .08  | .12  | .02  | 14.1       |
| I479Y                 | 1.0                                                 | .04  | .01  | .04  | .03  | 1.5        | 23.3                     | .04  | .02  | .04  | .03  | 32.9       | 21.5                     | .04  | .04  | .04  | .05  | 22.2       |
| I479A                 | .8                                                  | .02  | .01  | .03  | .06  | 1.4        | 41.5                     | .04  | .03  | .04  | .06  | 45.9       | 40.0                     | .05  | .06  | .10  | .07  | 26.6       |
| I479S                 | .5                                                  | .05  | .01  | .03  | .06  | .6         | 36.2                     | .03  | .02  | .06  | .09  | 34.1       | 35.6                     | .06  | .05  | .06  | .03  | 30.9       |
| I479N                 | .1                                                  | .06  | .02  | .04  | .03  | .2         | 20.2                     | .01  | .03  | .03  | .06  | 31.0       | 25.0                     | .05  | .04  | .11  | .08  | 16.9       |
| I479H                 | .1                                                  | .04  | .02  | .04  | .04  | .1         | 19.0                     | .03  | .04  | .02  | .05  | 26.3       | 19.7                     | .03  | .04  | .04  | .07  | 20.9       |
| I479G                 | .1                                                  | .03  | .03  | .03  | .05  | .1         | 11.1                     | .04  | .02  | .01  | .04  | 16.4       | 18.5                     | .04  | .03  | .02  | .11  | 17.6       |
| I479R                 | .0                                                  | .07  | .02  | .06  | .01  | .1         | 3.2                      | .01  | .03  | .03  | .10  | 3.3        | 3.2                      | .04  | .03  | .01  | .04  | 4.9        |
| I479P                 | .0                                                  | .02  | .03  | .04  | .04  | .1         | 3.8                      | .01  | .03  | .04  | .04  | 5.9        | 1.3                      | .04  | .03  | .06  | .07  | 1.2        |
| I479K                 | .0                                                  | .04  | .03  | .01  | .03  | .1         | .4                       | .01  | .02  | .04  | .07  | .6         | .8                       | .04  | .01  | .01  | .06  | 1.2        |
| I479W                 | .0                                                  | .01  | .04  | .03  | .04  | .1         | 3.9                      | .04  | .00  | .04  | .04  | 5.8        | 6.9                      | .01  | .02  | .06  | .05  | 8.7        |
| I479E                 | .0                                                  | .04  | .02  | .06  | .04  | .0         | 1.5                      | .03  | .02  | .05  | .03  | 2.1        | 13.2                     | .04  | .02  | .02  | .07  | 15.4       |
| I479D                 | .0                                                  | .04  | .04  | .01  | .03  | .0         | 1.0                      | .01  | .03  | .02  | .06  | 1.4        | 6.5                      | .03  | .01  | .04  | .04  | 10.1       |
| GFP                   | .0                                                  | .06  | .02  | .02  | .05  | NA         | .0                       | .06  | .02  | .02  | .05  | NA         | .0                       | .06  | .02  | .02  | .05  | NA         |
| GFP                   | .0                                                  | .04  | .01  | .06  | .03  | NA         | .0                       | .04  | .01  | .06  | .03  | NA         | .0                       | .04  | .01  | .06  | .03  | NA         |

**Supplementary Table 6.** On and off-target activity of variants of the AAVS1 ZFN dimer bearing each single-residue substitution of I479. For additional detail see legend to **Supplementary Table 4**.

| FokI domain variant | ZFN-L <sub>variant</sub> + ZFN-R <sub>variant</sub> |      |       |      |      |                         | ZFN-L <sub>variant</sub> |      |      |      |      |                         | ZFN-R <sub>variant</sub> |      |      |      |      |                         |
|---------------------|-----------------------------------------------------|------|-------|------|------|-------------------------|--------------------------|------|------|------|------|-------------------------|--------------------------|------|------|------|------|-------------------------|
|                     | % indels                                            |      |       |      |      | (on/Σoff)<br>normalized | % indels                 |      |      |      |      | (on/Σoff)<br>normalized | % indels                 |      |      |      |      | (on/Σoff)<br>normalized |
|                     | ON                                                  | OT1  | OT2   | OT3  | OT4  |                         | ON                       | OT1  | OT2  | OT3  | OT4  |                         | ON                       | OT1  | OT2  | OT3  | OT4  |                         |
| 1                   | 2                                                   | 3    | 4     | 5    | 6    | 7                       | 8                        | 9    | 10   | 11   | 12   | 13                      | 14                       | 15   | 16   | 17   | 18   | 19                      |
| parent              | 48.0                                                | 2.12 | 4.32  | 1.05 | .84  | .9                      | 48.0                     | 2.12 | 4.32 | 1.05 | .84  | .9                      | 48.0                     | 2.12 | 4.32 | 1.05 | .84  | .9                      |
| - full dose         | 46.4                                                | 1.84 | 4.34  | 1.11 | 1.06 | .9                      | 46.4                     | 1.84 | 4.34 | 1.11 | 1.06 | .9                      | 46.4                     | 1.84 | 4.34 | 1.11 | 1.06 | .9                      |
|                     | 45.8                                                | 1.28 | 3.15  | .77  | .92  | 1.2                     | 45.8                     | 1.28 | 3.15 | .77  | .92  | 1.2                     | 45.8                     | 1.28 | 3.15 | .77  | .92  | 1.2                     |
|                     | 47.6                                                | 1.67 | 4.30  | .99  | 1.03 | 1.0                     | 47.6                     | 1.67 | 4.30 | .99  | 1.03 | 1.0                     | 47.6                     | 1.67 | 4.30 | .99  | 1.03 | 1.0                     |
| parent              | 30.8                                                | .38  | 1.21  | .19  | .18  | 2.5                     | 30.8                     | .38  | 1.21 | .19  | .18  | 2.5                     | 30.8                     | .38  | 1.21 | .19  | .18  | 2.5                     |
| - half dose         | 31.6                                                | .23  | 1.19  | .28  | .18  | 2.7                     | 31.6                     | .23  | 1.19 | .28  | .18  | 2.7                     | 31.6                     | .23  | 1.19 | .28  | .18  | 2.7                     |
|                     | 29.5                                                | .35  | .76   | .21  | .16  | 3.2                     | 29.5                     | .35  | .76  | .21  | .16  | 3.2                     | 29.5                     | .35  | .76  | .21  | .16  | 3.2                     |
|                     | 28.0                                                | .31  | .85   | .20  | .17  | 3.0                     | 28.0                     | .31  | .85  | .20  | .17  | 3.0                     | 28.0                     | .31  | .85  | .20  | .17  | 3.0                     |
| Q481D               | 90.5                                                | .05  | .12   | .10  | .16  | 34.6                    | 78.2                     | .21  | .54  | .87  | .29  | 6.6                     | 60.0                     | .07  | 1.15 | .10  | .30  | 6.0                     |
| Q481A               | 86.3                                                | .04  | .02   | .04  | .09  | 74.7                    | 56.1                     | .10  | .06  | .14  | .05  | 25.9                    | 48.3                     | .05  | .15  | .03  | .09  | 24.3                    |
| Q481H               | 84.3                                                | .65  | 22.17 | 4.71 | 1.07 | 5                       | 71.3                     | 5.48 | 7.24 | 1.76 | .15  | .8                      | 55.9                     | .15  | 2.69 | .51  | 2.74 | 1.5                     |
| Q481C               | 66.1                                                | .03  | .05   | .05  | .09  | 48.5                    | 61.8                     | .28  | .05  | .35  | .22  | 11.2                    | 53.5                     | .15  | 1.44 | .04  | .28  | 4.5                     |
| Q481E               | 57.0                                                | .03  | .04   | .04  | .05  | 55.4                    | 61.1                     | .05  | .03  | .12  | .04  | 40.2                    | 56.8                     | .04  | .18  | .03  | .08  | 27.0                    |
| Q481S               | 55.0                                                | .04  | .02   | .07  | .05  | 49.8                    | 50.8                     | .07  | .05  | .14  | .04  | 27.7                    | 47.9                     | .07  | .29  | .03  | .11  | 15.2                    |
| Q481T               | 33.3                                                | .02  | .02   | .00  | .07  | 47.0                    | 36.9                     | .07  | .05  | .11  | .01  | 24.2                    | 35.6                     | .06  | .06  | .04  | .05  | 27.4                    |
| Q481N               | 29.4                                                | .05  | .20   | .13  | .09  | 10.0                    | 36.7                     | .50  | 1.29 | .65  | .22  | 2.2                     | 38.6                     | .09  | .50  | .12  | .22  | 6.7                     |
| Q481G               | 18.1                                                | .13  | .34   | .18  | .12  | 3.8                     | 33.5                     | .32  | .43  | .74  | .24  | 3.1                     | 23.6                     | .55  | 2.40 | .25  | .31  | 1.1                     |
| Q481R               | 3.8                                                 | .04  | .03   | .03  | .03  | 4.7                     | 5.6                      | .02  | .04  | .04  | .01  | 7.4                     | 7.8                      | .04  | .05  | .05  | .02  | 7.7                     |
| Q481K               | 3.4                                                 | .05  | .03   | .02  | .10  | 2.8                     | 19.9                     | .06  | .05  | .05  | .04  | 16.6                    | 2.2                      | .03  | .03  | .02  | .06  | 2.7                     |
| Q481M               | 1.9                                                 | .03  | .03   | .09  | .08  | 1.3                     | 5.6                      | .05  | .02  | .04  | .04  | 5.8                     | 21.6                     | .04  | .06  | .06  | .03  | 18.9                    |
| Q481P               | .4                                                  | .03  | .03   | .08  | .10  | .3                      | 2.0                      | .01  | .02  | .07  | .04  | 2.3                     | 4.8                      | .07  | .03  | .02  | .03  | 5.1                     |
| Q481Y               | .4                                                  | .01  | .03   | .02  | .05  | .6                      | 1.8                      | .04  | .04  | .05  | .02  | 1.9                     | 12.7                     | .03  | .22  | .09  | .11  | 4.6                     |
| Q481L               | .1                                                  | .01  | .03   | .03  | .06  | .2                      | 1.2                      | .05  | .03  | .04  | .03  | 1.3                     | 7.0                      | .01  | .03  | .03  | .03  | 10.8                    |
| Q481V               | .1                                                  | .01  | .03   | .03  | .09  | .1                      | 1.5                      | .06  | .03  | .06  | .02  | 1.3                     | 2.3                      | .03  | .02  | .07  | .03  | 2.4                     |
| Q481I               | .1                                                  | .01  | .03   | .02  | .06  | .1                      | .9                       | .04  | .04  | .07  | .02  | .9                      | 3.0                      | .05  | .03  | .04  | .02  | 3.5                     |
| Q481F               | .0                                                  | .02  | .04   | .08  | .05  | .0                      | .5                       | .05  | .02  | .02  | .05  | .6                      | .9                       | .04  | .05  | .04  | .05  | .8                      |
| Q481W               | .0                                                  | .04  | .02   | .04  | .07  | .0                      | .2                       | .02  | .03  | .04  | .03  | .3                      | .1                       | .02  | .03  | .04  | .01  | .2                      |
| N527D               | 34.9                                                | .04  | .05   | .07  | .07  | 25.0                    | 45.1                     | .11  | .42  | .21  | .12  | 8.6                     | 46.4                     | .48  | .77  | .61  | .21  | 3.6                     |
| N527G               | 12.8                                                | .08  | .30   | .40  | .34  | 1.8                     | 25.3                     | .92  | 1.22 | .60  | .71  | 1.2                     | 26.1                     | .46  | 1.25 | .54  | .45  | 1.6                     |
| N527P               | 10.0                                                | .04  | .04   | .06  | .06  | 7.9                     | 34.7                     | .97  | 2.50 | .72  | .63  | 1.2                     | 15.1                     | .10  | .10  | .13  | .05  | 6.4                     |
| N527S               | 9.7                                                 | .14  | .12   | .15  | .16  | 2.7                     | 22.5                     | .67  | .93  | .37  | .32  | 1.6                     | 20.8                     | .44  | .84  | .49  | .31  | 1.6                     |
| N527Q               | 9.1                                                 | .82  | .90   | .33  | .20  | .7                      | 25.7                     | 1.76 | 2.62 | 1.13 | .99  | .6                      | 17.4                     | 1.19 | 1.69 | .40  | .34  | .8                      |
| N527A               | 8.6                                                 | .14  | .25   | .13  | .17  | 2.0                     | 20.5                     | .34  | .76  | .42  | .28  | 1.8                     | 18.7                     | .48  | .77  | .29  | .43  | 1.5                     |
| N527H               | 7.9                                                 | .68  | .58   | .31  | .22  | .7                      | 20.7                     | 1.10 | 1.65 | .55  | .13  | 1.0                     | 16.7                     | .99  | .89  | .40  | .31  | 1.0                     |
| N527K               | 6.7                                                 | .29  | .36   | .29  | .12  | 1.0                     | 14.7                     | .66  | 1.31 | .49  | .11  | .9                      | 19.0                     | .77  | .77  | .40  | .34  | 1.3                     |
| N527E               | 4.6                                                 | .03  | .03   | .05  | .06  | 4.2                     | 18.9                     | .08  | .06  | .13  | .09  | 8.4                     | 24.4                     | .66  | .65  | .25  | .26  | 2.2                     |
| N527C               | 3.3                                                 | .08  | .10   | .04  | .09  | 1.7                     | 16.3                     | .25  | .80  | .25  | .17  | 1.8                     | 9.0                      | .39  | .30  | .17  | .21  | 1.4                     |
| N527V               | 1.4                                                 | .03  | .30   | .09  | .10  | .4                      | 4.2                      | .09  | .14  | .10  | .05  | 1.8                     | 1.4                      | .05  | .04  | .07  | .02  | 1.2                     |
| N527M               | 1.3                                                 | .14  | .07   | .09  | .09  | .5                      | 6.6                      | .18  | .44  | .23  | .08  | 1.1                     | 5.7                      | .43  | .22  | .20  | .18  | .9                      |
| N527F               | .7                                                  | .07  | .03   | .05  | .04  | .6                      | 5.3                      | .16  | .21  | .15  | .02  | 1.6                     | 3.5                      | .21  | .14  | .06  | .06  | 1.2                     |
| N527I               | .0                                                  | .03  | .03   | .01  | .06  | .0                      | 1.6                      | .02  | .04  | .07  | .01  | 1.8                     | 1.0                      | .07  | .03  | .03  | .02  | 1.1                     |
| N527T               | ND                                                  | ND   | ND    | ND   | ND   | ND                      | 25.1                     | .14  | .25  | .12  | .04  | 7.3                     | ND                       | ND   | ND   | ND   | ND   | ND                      |
| N527R               | ND                                                  | ND   | ND    | ND   | ND   | ND                      | 17.4                     | 1.07 | 1.70 | .37  | .28  | .8                      | ND                       | ND   | ND   | ND   | ND   | ND                      |
| N527Y               | ND                                                  | ND   | ND    | ND   | ND   | ND                      | 5.3                      | .18  | .22  | .12  | .06  | 1.5                     | ND                       | ND   | ND   | ND   | ND   | ND                      |
| N527L               | ND                                                  | ND   | ND    | ND   | ND   | ND                      | 3.4                      | .12  | .22  | .09  | .06  | 1.1                     | ND                       | ND   | ND   | ND   | ND   | ND                      |
| N527W               | ND                                                  | ND   | ND    | ND   | ND   | ND                      | 3.3                      | .05  | .17  | .11  | .04  | 1.5                     | ND                       | ND   | ND   | ND   | ND   | ND                      |
| GFP                 | .0                                                  | .03  | .02   | .02  | .05  | NA                      | .0                       | .03  | .02  | .02  | .05  | NA                      | .0                       | .03  | .02  | .02  | .05  | NA                      |
| GFP                 | .0                                                  | .02  | .03   | .05  | .06  | NA                      | .0                       | .02  | .03  | .05  | .06  | NA                      | .0                       | .02  | .03  | .05  | .06  | NA                      |

**Supplementary Table 7.** On and off-target activity of variants of the AAVS1 ZFN dimer bearing each single-residue substitution of Q481 and N527. For additional detail see legend to **Supplementary Table 4**.

| FokI domain variant | ZFN-L <sub>variant</sub> + ZFN-R <sub>variant</sub> |      |      |      |      |           | ZFN-L <sub>variant</sub> |      |       |      |      |           | ZFN-R <sub>variant</sub> |            |      |      |      |           |
|---------------------|-----------------------------------------------------|------|------|------|------|-----------|--------------------------|------|-------|------|------|-----------|--------------------------|------------|------|------|------|-----------|
|                     | % indels                                            |      |      |      |      | (on/Σoff) | % indels                 |      |       |      |      | (on/Σoff) | % indels                 |            |      |      |      | (on/Σoff) |
|                     | ON                                                  | OT1  | OT2  | OT3  | OT4  |           | normalized               | ON   | OT1   | OT2  | OT3  |           | OT4                      | normalized | ON   | OT1  | OT2  |           |
| 1                   | 2                                                   | 3    | 4    | 5    | 6    | 7         | 8                        | 9    | 10    | 11   | 12   | 13        | 14                       | 15         | 16   | 17   | 18   | 19        |
| parent              | 42.6                                                | 3.88 | 7.68 | 2.05 | 2.94 | .9        | 42.6                     | 3.88 | 7.68  | 2.05 | 2.94 | .9        | 42.6                     | 3.88       | 7.68 | 2.05 | 2.94 | .9        |
| - full dose         | 41.6                                                | 3.50 | 6.44 | 1.64 | 2.72 | 1.0       | 41.6                     | 3.50 | 6.44  | 1.64 | 2.72 | 1.0       | 41.6                     | 3.50       | 6.44 | 1.64 | 2.72 | 1.0       |
|                     | 41.5                                                | 2.93 | 6.14 | 1.36 | 2.25 | 1.1       | 41.5                     | 2.93 | 6.14  | 1.36 | 2.25 | 1.1       | 41.5                     | 2.93       | 6.14 | 1.36 | 2.25 | 1.1       |
|                     | 38.5                                                | 3.14 | 6.24 | 1.32 | 2.35 | 1.0       | 38.5                     | 3.14 | 6.24  | 1.32 | 2.35 | 1.0       | 38.5                     | 3.14       | 6.24 | 1.32 | 2.35 | 1.0       |
| parent              | 32.5                                                | 1.00 | 2.46 | .46  | .63  | 2.4       | 32.5                     | 1.00 | 2.46  | .46  | .63  | 2.4       | 32.5                     | 1.00       | 2.46 | .46  | .63  | 2.4       |
| - half dose         | 32.0                                                | 1.02 | 2.41 | .53  | .51  | 2.4       | 32.0                     | 1.02 | 2.41  | .53  | .51  | 2.4       | 32.0                     | 1.02       | 2.41 | .53  | .51  | 2.4       |
|                     | 27.3                                                | .45  | 1.29 | .19  | .34  | 4.1       | 27.3                     | .45  | 1.29  | .19  | .34  | 4.1       | 27.3                     | .45        | 1.29 | .19  | .34  | 4.1       |
|                     | 30.0                                                | .91  | 2.06 | .36  | .61  | 2.6       | 30.0                     | .91  | 2.06  | .36  | .61  | 2.6       | 30.0                     | .91        | 2.06 | .36  | .61  | 2.6       |
| N476G               | 58.2                                                | .07  | .10  | .08  | .07  | 63.3      | 62.7                     | .60  | 3.13  | .56  | .41  | 4.6       | 45.3                     | .59        | 2.34 | 1.16 | .85  | 3.1       |
| N476S               | 55.3                                                | 2.32 | 8.64 | 2.13 | 3.28 | 1.2       | 54.4                     | 4.38 | 9.71  | 2.67 | 2.74 | 1.0       | 49.9                     | 3.00       | 9.00 | 2.07 | 4.76 | .9        |
| N476T               | 55.0                                                | .98  | 1.63 | .97  | 1.04 | 4.1       | 53.1                     | 2.35 | 5.19  | 1.77 | 1.75 | 1.6       | 48.4                     | 2.03       | 4.98 | 1.55 | 2.71 | 1.5       |
| N476C               | 46.4                                                | .56  | .54  | .43  | .24  | 9.0       | 46.8                     | 1.92 | 3.74  | 1.35 | .97  | 2.0       | 44.4                     | 1.35       | 3.25 | .98  | 1.44 | 2.2       |
| N476A               | 38.7                                                | .22  | .88  | .75  | .33  | 6.1       | 43.6                     | 1.86 | 3.28  | 1.50 | 1.15 | 1.9       | 41.8                     | 1.60       | 3.81 | 1.20 | 1.97 | 1.7       |
| N476H               | 36.6                                                | 1.48 | 2.95 | 1.06 | 1.09 | 1.9       | 41.6                     | 3.07 | 4.94  | 1.81 | 2.48 | 1.2       | 41.1                     | 2.71       | 7.08 | 1.20 | 2.06 | 1.1       |
| N476R               | 36.3                                                | 3.04 | 3.33 | 1.67 | .76  | 1.4       | 40.2                     | 4.87 | 6.10  | 2.55 | 1.41 | .9        | 44.3                     | 3.71       | 6.29 | 1.38 | 3.07 | 1.0       |
| N476Q               | 29.7                                                | .06  | .06  | .09  | .12  | 31.1      | 38.6                     | .77  | 2.08  | .80  | .51  | 3.2       | 38.6                     | .42        | 1.03 | .50  | .58  | 5.2       |
| N476P               | 28.8                                                | .61  | 1.82 | .74  | 1.21 | 2.3       | 40.2                     | 3.21 | 6.83  | 1.40 | 2.79 | 1.0       | 33.0                     | 1.21       | 3.11 | 1.38 | 2.72 | 1.3       |
| N476K               | 25.8                                                | .10  | .31  | .60  | .10  | 8.0       | 32.0                     | 1.00 | 3.78  | 1.62 | .46  | 1.6       | 41.2                     | .87        | 2.04 | 1.11 | .88  | 2.9       |
| N476V               | 24.4                                                | .05  | .06  | .06  | .07  | 34.8      | 34.8                     | .53  | .49   | .36  | .22  | 7.5       | 39.9                     | .23        | .55  | .22  | .46  | 9.3       |
| N476M               | 16.0                                                | .12  | .29  | .17  | .12  | 7.9       | 27.9                     | 1.14 | 2.27  | .73  | .81  | 1.9       | 30.4                     | .79        | 2.34 | .75  | .77  | 2.2       |
| N476Y               | 14.0                                                | .30  | .80  | .38  | .17  | 2.9       | 26.6                     | 1.63 | 2.53  | .73  | 1.41 | 1.4       | 26.1                     | 1.46       | 2.86 | 1.06 | .50  | 1.5       |
| N476I               | 13.5                                                | .03  | .03  | .02  | .02  | 48.4      | 30.5                     | .55  | .21   | .29  | .25  | 8.0       | 33.9                     | .30        | .59  | .16  | .30  | 8.7       |
| N476D               | 8.2                                                 | .02  | .02  | .04  | .07  | 19.5      | 67.3                     | .09  | .20   | .18  | .16  | 36.4      | 31.3                     | .16        | .10  | .06  | .04  | 30.1      |
| N476F               | 6.6                                                 | .16  | .21  | .05  | .11  | 4.3       | 18.1                     | 1.12 | 1.22  | .77  | .39  | 1.8       | 15.1                     | .60        | 1.21 | .29  | .38  | 2.1       |
| N476W               | 4.0                                                 | .00  | .09  | .08  | .03  | 6.6       | 14.9                     | 1.13 | .49   | .39  | .22  | 2.3       | 13.6                     | 1.64       | 1.05 | .36  | .38  | 1.4       |
| N476E               | 2.0                                                 | .01  | .04  | .03  | .05  | 5.4       | 65.4                     | .06  | .07   | .08  | .07  | 78.3      | 37.7                     | .04        | .07  | .04  | .03  | 75.3      |
| N476L               | 1.7                                                 | .01  | .04  | .06  | .04  | 4.1       | 12.5                     | .15  | .13   | .14  | .10  | 8.1       | 11.8                     | .13        | .23  | .09  | .12  | 7.1       |
| Q531R               | 43.9                                                | .15  | .46  | .18  | .10  | 16.7      | 48.6                     | .43  | 1.11  | .26  | .46  | 7.4       | 41.4                     | 1.96       | 1.89 | 1.07 | .70  | 2.5       |
| Q531H               | 42.7                                                | 1.12 | 7.88 | 1.19 | 3.73 | 1.0       | 47.2                     | 3.04 | 10.36 | 2.12 | 6.48 | .7        | 38.8                     | 1.57       | 6.91 | .91  | 2.35 | 1.1       |
| Q531K               | 38.5                                                | 5.20 | 8.02 | 1.54 | 2.03 | .8        | 42.1                     | 4.18 | 7.43  | 1.80 | 6.55 | .7        | 38.6                     | 6.05       | 9.56 | 1.62 | 1.05 | .7        |
| Q531T               | 29.4                                                | .03  | .06  | .07  | .05  | 49.2      | 37.9                     | .37  | .40   | .30  | .33  | 9.3       | 38.7                     | .31        | 2.20 | .37  | .43  | 4.0       |
| Q531V               | 19.8                                                | .01  | .05  | .01  | .09  | 43.0      | 33.2                     | .12  | .11   | .12  | .02  | 30.0      | 33.7                     | .05        | .81  | .07  | .18  | 10.4      |
| Q531A               | 17.7                                                | .20  | .53  | .18  | .22  | 5.4       | 25.9                     | .48  | 1.96  | .37  | .70  | 2.5       | 33.8                     | 2.47       | 3.29 | .89  | .94  | 1.5       |
| Q531M               | 17.4                                                | .04  | .04  | .01  | .08  | 34.5      | 30.6                     | .40  | .35   | .31  | .19  | 8.4       | 39.7                     | .57        | 1.07 | .46  | .37  | 5.5       |
| Q531S               | 6.7                                                 | .06  | .07  | .10  | .06  | 7.7       | 14.9                     | .17  | .39   | .20  | .33  | 4.7       | 20.1                     | .79        | 1.59 | .52  | .35  | 2.1       |
| Q531N               | 6.4                                                 | .22  | .40  | .08  | .09  | 2.8       | 13.0                     | .24  | .69   | .28  | .46  | 2.7       | 33.2                     | 1.85       | 5.31 | .84  | 1.27 | 1.2       |
| Q531E               | 5.4                                                 | .03  | .04  | .03  | .04  | 13.1      | 29.5                     | .02  | .06   | .06  | .05  | 51.6      | 18.2                     | .30        | .32  | .57  | .13  | 4.7       |
| Q531C               | 3.1                                                 | .02  | .03  | .02  | .08  | 7.0       | 12.6                     | .11  | .16   | .21  | .09  | 7.5       | 13.2                     | .21        | .33  | .28  | .12  | 4.8       |
| Q531I               | 2.6                                                 | .01  | .03  | .04  | .05  | 7.2       | 25.7                     | .02  | .05   | .04  | .06  | 48.3      | 32.4                     | .03        | .15  | .08  | .07  | 33.3      |
| Q531Y               | 1.5                                                 | .02  | .06  | .02  | .06  | 3.3       | 18.1                     | .02  | .04   | .04  | .03  | 45.6      | 6.0                      | .06        | .23  | .08  | .06  | 4.8       |
| Q531G               | 1.4                                                 | .11  | .16  | .06  | .07  | 1.1       | 7.4                      | .20  | .56   | .27  | .45  | 1.7       | 7.1                      | 1.39       | .63  | .35  | .25  | .9        |
| Q531L               | .3                                                  | .01  | .03  | .03  | .09  | .7        | 12.8                     | .04  | .03   | .05  | .04  | 26.2      | 30.9                     | .02        | .06  | .05  | .04  | 62.1      |
| Q531W               | .2                                                  | .02  | .05  | .02  | .06  | .4        | 2.8                      | .02  | .05   | .05  | .11  | 4.3       | 3.7                      | .06        | .13  | .05  | .06  | 4.2       |
| Q531F               | .2                                                  | .00  | .03  | .04  | .05  | .6        | 4.1                      | .02  | .02   | .04  | .09  | 8.0       | 4.3                      | .04        | .04  | .04  | .06  | 8.3       |
| Q531P               | .1                                                  | .02  | .03  | .03  | .04  | .4        | 5.3                      | .03  | .05   | .08  | .05  | 9.0       | 3.9                      | .09        | .08  | .06  | .05  | 4.7       |
| Q531D               | .0                                                  | .01  | .02  | .02  | .03  | .2        | 4.5                      | .01  | .05   | .03  | .05  | 10.3      | 6.1                      | .02        | .05  | .04  | .08  | 10.7      |
| GFP                 | .1                                                  | .01  | .03  | ND   | .04  | NA        | .1                       | .01  | .03   | ND   | .04  | NA        | .1                       | .01        | .03  | ND   | .04  | NA        |
| GFP                 | .1                                                  | .03  | .02  | .01  | .02  | NA        | .1                       | .03  | .02   | .01  | .02  | NA        | .1                       | .03        | .02  | .01  | .02  | NA        |

**Supplementary Table 8.** On and off-target activity of variants of the AAVS1 ZFN dimer bearing each single-residue substitution of N476 and Q531. For additional detail see legend to **Supplementary Table 4**.

| FokI domain variant* | RNA dose (ng) | % indels |       |       |      |      | Σ OT indels | on:off ratio |
|----------------------|---------------|----------|-------|-------|------|------|-------------|--------------|
|                      |               | AAVS1    | OT1   | OT2   | OT3  | OT4  |             |              |
| 1                    | 2             | 3        | 4     | 5     | 6    | 7    | 8           | 9            |
| < parent >           | 1600          | 69.7     | 14.68 | 19.07 | 5.82 | 9.00 | 48.57       | 1.4          |
|                      | 800           | 68.5     | 11.73 | 17.39 | 4.74 | 7.40 | 41.26       | 1.7 ←        |
|                      | 400           | 60.2     | 5.00  | 9.50  | 2.49 | 2.80 | 19.78       | 3.0          |
|                      | 200           | 50.1     | 1.78  | 4.33  | .91  | .88  | 7.90        | 6.3          |
| R416D                | 800           | 76.6     | .08   | .04   | .07  | .06  | .25         | 307 ←        |
|                      | 400           | 66.3     | .02   | .01   | .02  | .01  | .06         | 1109 ←       |
| R416E                | 200           | 50.3     | .03   | .02   | .00  | .00  | .06         | 909          |
|                      | 800           | 91.4     | .80   | .76   | .70  | .42  | 2.69        | 34           |
|                      | 400           | 87.0     | .32   | .29   | .19  | .15  | .95         | 92           |
| R416N                | 200           | 80.9     | .13   | .11   | .07  | .03  | .35         | 233 ←        |
|                      | 100           | 61.9     | .03   | .03   | .01  | .01  | .08         | 789          |
|                      | 800           | 88.8     | .95   | 1.76  | .89  | .61  | 4.21        | 21           |
| R416S                | 400           | 83.7     | .37   | .54   | .29  | .22  | 1.43        | 59           |
|                      | 200           | 73.8     | .15   | .20   | .06  | .02  | .44         | 168 ←        |
|                      | 800           | 73.8     | 1.22  | 1.89  | 1.27 | .81  | 5.18        | 14 ←         |
| S418E                | 400           | 65.8     | .50   | .71   | .46  | .29  | 1.94        | 34           |
|                      | 200           | 50.8     | .18   | .16   | .12  | .08  | .55         | 93           |
|                      | 800           | 67.8     | .01   | .00   | .00  | .02  | .04         | 1930 ←       |
| R422H                | 400           | 55.2     | .01   | .02   | .01  | .03  | .06         | 869          |
|                      | 200           | 35.7     | .00   | .00   | .00  | .02  | .03         | 1252         |
|                      | 800           | 70.3     | .66   | 1.00  | .79  | .45  | 2.90        | 24 ←         |
| N476G                | 400           | 61.9     | .30   | .49   | .37  | .19  | 1.35        | 46           |
|                      | 200           | 48.5     | .09   | .14   | .06  | .07  | .36         | 136          |
|                      | 800           | 79.5     | .11   | .43   | .34  | .17  | 1.05        | 76           |
| I479Q                | 400           | 71.3     | .05   | .19   | .13  | .05  | .43         | 166 ←        |
|                      | 200           | 54.2     | .03   | .03   | .05  | .02  | .12         | 437          |
|                      | 800           | 81.0     | .03   | .01   | .00  | .01  | .06         | 1420         |
| Q481A                | 400           | 73.0     | .02   | .00   | .00  | .01  | .03         | 2191 ←       |
|                      | 200           | 58.5     | .01   | .00   | .00  | .01  | .02         | 3703         |
|                      | 800           | 92.2     | .02   | .02   | .02  | .02  | .08         | 1143         |
| Q481D                | 400           | 88.6     | .01   | .00   | .01  | .02  | .05         | 1943         |
|                      | 200           | 83.6     | .01   | .02   | .00  | .01  | .04         | 2352 ←       |
|                      | 100           | 67.1     | .00   | .00   | .00  | .01  | .02         | 3244         |
| Q481E                | 800           | 94.6     | .02   | .73   | .14  | .45  | 1.34        | 71           |
|                      | 400           | 92.4     | .01   | .24   | .02  | .16  | .42         | 219          |
|                      | 200           | 89.9     | .01   | .12   | .03  | .05  | .21         | 423          |
| K525A                | 100           | 81.7     | .00   | .06   | .00  | .03  | .10         | 851 ←        |
|                      | 800           | 80.4     | .01   | .00   | .00  | .01  | .02         | 5058         |
|                      | 400           | 74.1     | .00   | .01   | .00  | .03  | .05         | 1474 ←       |
| K525S                | 200           | 58.3     | .01   | .00   | .00  | .01  | .02         | 2638         |
|                      | 800           | 77.6     | .05   | .06   | .04  | .05  | .20         | 396          |
|                      | 400           | 69.3     | .01   | .05   | .01  | .04  | .11         | 615 ←        |
| K525T                | 200           | 54.7     | .01   | .01   | .00  | .02  | .04         | 1402         |
|                      | 800           | 82.2     | .07   | .11   | .07  | .11  | .35         | 232          |
|                      | 400           | 73.7     | .06   | .07   | .03  | .06  | .21         | 343 ←        |
| < GFP >              | 200           | 58.5     | .02   | .03   | .01  | .01  | .07         | 877          |
|                      | 800           | 86.5     | .69   | 2.04  | .45  | .94  | 4.12        | 21           |
|                      | 400           | 81.4     | .29   | .67   | .19  | .26  | 1.41        | 58           |
|                      | 400           | 70.3     | .08   | .21   | .06  | .06  | .40         | 176 ←        |
|                      |               | .1       | .00   | .00   | .00  | .01  | .01         | NA           |

\*Each variant was tested as a dimer in which both ZFN-L and ZFN-R bore the indicated substitution

**Supplementary Table 9.** Activity and specificity of selected variants identified in FokI substitution screens of the AAVS1 ZFN dimer. Each variant was tested as a dimer in which both ZFN-L and ZFN-R bore the indicated substitution. ZFNs were delivered to human K562 cells via mRNA nucleofection at the dose indicated in column 2, followed by genomic DNA isolation at 3 days and deep sequencing analysis for indels at the intended target or four off-target sites. Each % indel value represents the average from four biological replicates. Column 3 provides the % indels measured at the intended target, while columns 4-7 indicate the % indels measured at four previously known off-target sites and column 8 indicates the sum of % indels at these four off-target sites. Column 9 lists the on:off-target indel ratio (= column 3 /

column 8). To highlight relative signal intensities, table values are embedded in heat maps (green – on target indels; red – off-target indels; blue – on:off ratio). Arrows highlight samples with activities comparable to or greater than the 800 ng dose of parents and that were consequently shown in Table 1.

| wt oligo capture (400 ng) |           |              | wt      |      |      | I479Q   |      |      | Q481A   |      |      |
|---------------------------|-----------|--------------|---------|------|------|---------|------|------|---------|------|------|
| hg38 coordinates          |           | integrations | %indels |      | pval | %indels |      | pval | %indels |      | pval |
|                           |           |              | ZFN     | GFP  |      | ZFN     | GFP  |      | ZFN     | GFP  |      |
| chr19                     | 55115768  | 1330         | 66.29   | 0.00 | 0.00 | 78.48   | 0.00 | 0.00 | 85.49   | 0.00 | 0.00 |
| chr3                      | 184229818 | 174          | 9.61    | 0.00 | 0.00 | 0.06    | 0.00 | 0.04 | 0.01    | 0.00 | 0.56 |
| chr1                      | 198172184 | 455          | 5.73    | 0.00 | 0.00 | 0.09    | 0.02 | 0.04 | 0.02    | 0.01 | 0.91 |
| chr20                     | 35020704  | 163          | 4.04    | 0.00 | 0.00 | 0.01    | 0.03 | 1.00 | 0.03    | 0.00 | 0.39 |
| chr1                      | 181141476 | 195          | 3.49    | 0.00 | 0.00 | 0.01    | 0.00 | 0.35 | 0.00    | 0.00 | 1.00 |
| chr3                      | 50189772  | 209          | 3.39    | 0.00 | 0.00 | 0.04    | 0.00 | 0.04 | 0.00    | 0.01 | 1.00 |
| chr11                     | 76300996  | 67           | 2.58    | 0.01 | 0.00 | 0.05    | 0.01 | 0.04 | 0.01    | 0.01 | 1.00 |
| chr13                     | 40205820  | 55           | 2.46    | 0.00 | 0.00 | 0.02    | 0.01 | 0.24 | 0.00    | 0.01 | 1.00 |
| chr12                     | 47782518  | 107          | 2.12    | 0.02 | 0.00 | 0.02    | 0.02 | 0.79 | 0.00    | 0.02 | 1.00 |
| chr13                     | 26591916  | 36           | 2.12    | 0.00 | 0.00 | 0.01    | 0.00 | 0.24 | 0.01    | 0.00 | 0.91 |
| chr4                      | 11364294  | 49           | 1.66    | 0.00 | 0.00 | 0.01    | 0.02 | 1.00 | 0.00    | 0.00 | 1.00 |
| chr5                      | 68225722  | 79           | 1.56    | 0.00 | 0.00 | 0.03    | 0.00 | 0.04 | 0.02    | 0.00 | 0.39 |
| chr17                     | 64036794  | 154          | 1.55    | 0.00 | 0.00 | 0.03    | 0.03 | 0.86 | 0.02    | 0.05 | 1.00 |
| chr11                     | 61583600  | 81           | 1.31    | 0.00 | 0.00 | 0.03    | 0.00 | 0.04 | 0.01    | 0.00 | 0.56 |
| chr18                     | 48835990  | 31           | 1.23    | 0.00 | 0.00 | 0.02    | 0.01 | 0.41 | 0.03    | 0.01 | 0.52 |
| chr12                     | 126442484 | 21           | 1.15    | 0.00 | 0.00 | 0.03    | 0.00 | 0.04 | 0.00    | 0.01 | 1.00 |
| chr10                     | 73488048  | 31           | 0.94    | 0.01 | 0.00 | 0.00    | 0.10 | 1.00 | 0.05    | 0.00 | 0.39 |
| chr3                      | 37492070  | 54           | 0.94    | 0.00 | 0.00 | 0.02    | 0.02 | 0.63 | 0.01    | 0.05 | 1.00 |
| chr10                     | 68842214  | 55           | 0.91    | 0.00 | 0.00 | 0.02    | 0.01 | 0.33 | 0.02    | 0.00 | 0.61 |
| chr14                     | 30550484  | 34           | 0.91    | 0.01 | 0.00 | 0.01    | 0.00 | 0.14 | 0.01    | 0.02 | 1.00 |
| chr7                      | 128456566 | 50           | 0.79    | 0.02 | 0.00 | 0.01    | 0.10 | 1.00 | 0.03    | 0.04 | 1.00 |
| chr2                      | 96859552  | 83           | 0.73    | 0.00 | 0.00 | 0.01    | 0.01 | 0.39 | 0.02    | 0.00 | 0.39 |
| chr3                      | 172056094 | 19           | 0.65    | 0.00 | 0.00 | ND      | ND   | ND   | ND      | ND   | ND   |
| chr19                     | 2306802   | 28           | 0.61    | 0.00 | 0.00 | 0.00    | 0.02 | 1.00 | 0.00    | 0.00 | 1.00 |
| chr19                     | 11139414  | 75           | 0.59    | 0.00 | 0.00 | 0.01    | 0.01 | 0.88 | 0.00    | 0.00 | 1.00 |
| chr21                     | 5065744   | 20           | 0.59    | 0.02 | 0.00 | 0.01    | 0.01 | 0.79 | 0.00    | 0.00 | 1.00 |
| chr3                      | 184182170 | 22           | 0.57    | 0.00 | 0.00 | 0.01    | 0.01 | 1.00 | 0.00    | 0.00 | 1.00 |
| chr11                     | 45538310  | 22           | 0.57    | 0.01 | 0.00 | 0.01    | 0.00 | 0.38 | 0.00    | 0.01 | 1.00 |
| chr19                     | 49337262  | 66           | 0.55    | 0.00 | 0.00 | 0.03    | 0.01 | 0.09 | 0.01    | 0.00 | 0.56 |
| chr19                     | 1224746   | 51           | 0.52    | 0.00 | 0.00 | 0.01    | 0.00 | 0.24 | 0.01    | 0.00 | 0.56 |
| chr8                      | 144515636 | 41           | 0.51    | 0.00 | 0.00 | 0.01    | 0.01 | 0.83 | 0.01    | 0.01 | 0.91 |
| chr15                     | 88834438  | 50           | 0.47    | 0.00 | 0.00 | 0.02    | 0.00 | 0.09 | 0.01    | 0.00 | 0.56 |
| chr15                     | 84571034  | 96           | 0.46    | 0.02 | 0.00 | 0.05    | 0.01 | 0.27 | 0.02    | 0.02 | 0.91 |
| chr1                      | 14112422  | 19           | 0.45    | 0.00 | 0.00 | 0.02    | 0.01 | 0.07 | 0.01    | 0.00 | 0.39 |
| chr15                     | 81689072  | 32           | 0.44    | 0.01 | 0.00 | 0.03    | 0.01 | 0.14 | 0.01    | 0.01 | 0.91 |
| chrX                      | 15856772  | 78           | 0.44    | 0.01 | 0.00 | 0.04    | 0.12 | 1.00 | 0.08    | 0.01 | 0.12 |
| chr12                     | 113130622 | 27           | 0.41    | 0.06 | 0.00 | 0.01    | 0.02 | 1.00 | 0.01    | 0.02 | 1.00 |
| chr19                     | 47470024  | 29           | 0.39    | 0.00 | 0.00 | 0.03    | 0.01 | 0.07 | 0.01    | 0.00 | 0.91 |
| chr7                      | 102050526 | 40           | 0.34    | 0.00 | 0.00 | 0.01    | 0.02 | 1.00 | 0.00    | 0.03 | 1.00 |
| chr2                      | 36967986  | 42           | 0.33    | 0.01 | 0.00 | 0.02    | 0.05 | 1.00 | 0.04    | 0.01 | 0.39 |
| chr14                     | 103531006 | 31           | 0.32    | 0.00 | 0.00 | 0.05    | 0.01 | 0.04 | 0.01    | 0.00 | 0.68 |
| chr12                     | 54823166  | 27           | 0.32    | 0.01 | 0.00 | 0.00    | 0.00 | 0.35 | 0.01    | 0.01 | 1.00 |
| chr13                     | 49996346  | 28           | 0.30    | 0.03 | 0.00 | 0.04    | 0.01 | 0.07 | 0.04    | 0.03 | 0.75 |
| chr5                      | 1217650   | 41           | 0.30    | 0.00 | 0.00 | 0.01    | 0.00 | 0.35 | 0.00    | 0.00 | 1.00 |
| chr18                     | 11866942  | 32           | 0.30    | 0.00 | 0.00 | 0.03    | 0.01 | 0.04 | 0.01    | 0.01 | 0.91 |
| chr16                     | 70428130  | 47           | 0.30    | 0.01 | 0.00 | 0.00    | 0.00 | 0.35 | 0.00    | 0.01 | 1.00 |
| chr17                     | 39631920  | 37           | 0.29    | 0.00 | 0.00 | 0.01    | 0.02 | 1.00 | 0.01    | 0.01 | 1.00 |
| chr3                      | 134287458 | 38           | 0.27    | 0.01 | 0.00 | 0.01    | 0.00 | 0.35 | 0.00    | 0.01 | 1.00 |
| chr1                      | 3779130   | 170          | 0.27    | 0.00 | 0.00 | 0.01    | 0.00 | 0.07 | 0.02    | 0.00 | 0.39 |
| chr11                     | 48138440  | 28           | 0.27    | 0.01 | 0.00 | 0.01    | 0.01 | 0.69 | 0.00    | 0.01 | 1.00 |

Supplementary Table 10 (continued below)

| wt oligo capture- continued |              |    | wt      |      |      | I479Q   |      |      | Q481A   |      |      |
|-----------------------------|--------------|----|---------|------|------|---------|------|------|---------|------|------|
| hg38 coordinates            | integrations |    | %indels |      | pval | %indels |      | pval | %indels |      | pval |
|                             |              |    | ZFN     | GFP  |      | ZFN     | GFP  |      | ZFN     | GFP  |      |
| chr2                        | 217108872    | 24 | 0.26    | 0.01 | 0.00 | 0.01    | 0.00 | 0.46 | 0.00    | 0.02 | 1.00 |
| chr5                        | 148910878    | 22 | 0.25    | 0.00 | 0.00 | 0.01    | 0.01 | 0.79 | 0.01    | 0.01 | 0.91 |
| chr19                       | 42291652     | 24 | 0.25    | 0.01 | 0.00 | 0.03    | 0.01 | 0.09 | 0.00    | 0.01 | 1.00 |
| chr15                       | 70478526     | 30 | 0.22    | 0.00 | 0.00 | 0.00    | 0.01 | 1.00 | 0.01    | 0.00 | 0.56 |
| chr17                       | 75033800     | 28 | 0.22    | 0.00 | 0.00 | 0.01    | 0.00 | 0.28 | 0.00    | 0.01 | 1.00 |
| chr13                       | 72639358     | 19 | 0.22    | 0.00 | 0.00 | 0.00    | 0.00 | 0.63 | 0.00    | 0.00 | 1.00 |
| chr11                       | 78017714     | 22 | 0.22    | 0.00 | 0.00 | 0.01    | 0.00 | 0.07 | 0.00    | 0.00 | 0.56 |
| chr15                       | 32555628     | 28 | 0.21    | 0.02 | 0.00 | 0.01    | 0.03 | 1.00 | 0.03    | 0.02 | 0.68 |
| chr3                        | 14558032     | 20 | 0.21    | 0.01 | 0.00 | 0.01    | 0.01 | 0.93 | 0.03    | 0.01 | 0.56 |
| chr12                       | 103878180    | 54 | 0.20    | 0.00 | 0.00 | 0.05    | 0.07 | 1.00 | 0.02    | 0.01 | 0.56 |
| chr16                       | 81258590     | 33 | 0.20    | 0.01 | 0.00 | 0.01    | 0.03 | 1.00 | 0.00    | 0.03 | 1.00 |
| chr8                        | 99656330     | 20 | 0.20    | 0.00 | 0.00 | 0.01    | 0.01 | 0.79 | 0.01    | 0.00 | 0.65 |
| chr5                        | 157216616    | 29 | 0.20    | 0.01 | 0.00 | 0.02    | 0.00 | 0.07 | 0.01    | 0.02 | 1.00 |
| chr2                        | 25362220     | 31 | 0.19    | 0.02 | 0.00 | 0.01    | 0.02 | 1.00 | 0.00    | 0.02 | 1.00 |
| chr15                       | 30452078     | 28 | 0.19    | 0.03 | 0.00 | 0.01    | 0.02 | 1.00 | 0.00    | 0.04 | 1.00 |
| chr1                        | 93699008     | 23 | 0.18    | 0.00 | 0.00 | 0.01    | 0.00 | 0.09 | 0.01    | 0.00 | 0.65 |
| chr6                        | 40410142     | 21 | 0.17    | 0.00 | 0.00 | 0.01    | 0.00 | 0.14 | 0.00    | 0.01 | 1.00 |
| chr18                       | 41955254     | 27 | 0.17    | 0.00 | 0.00 | 0.01    | 0.01 | 0.89 | 0.01    | 0.01 | 1.00 |
| chr7                        | 6802396      | 24 | 0.16    | 0.00 | 0.00 | 0.00    | 0.03 | 1.00 | 0.04    | 0.00 | 0.39 |
| chr8                        | 47662294     | 37 | 0.16    | 0.00 | 0.00 | 0.00    | 0.00 | 0.35 | 0.00    | 0.01 | 1.00 |
| chr6                        | 7389498      | 21 | 0.15    | 0.00 | 0.00 | 0.00    | 0.01 | 1.00 | 0.01    | 0.00 | 0.54 |
| chr7                        | 5922514      | 24 | 0.15    | 0.01 | 0.00 | 0.03    | 0.02 | 0.37 | 0.00    | 0.01 | 1.00 |
| chr1                        | 31425552     | 35 | 0.14    | 0.00 | 0.00 | 0.00    | 0.00 | 1.00 | 0.00    | 0.00 | 1.00 |
| chr22                       | 21443968     | 50 | 0.14    | 0.01 | 0.00 | 0.02    | 0.00 | 0.06 | 0.00    | 0.01 | 1.00 |
| chr19                       | 14571814     | 20 | 0.14    | 0.02 | 0.00 | 0.03    | 0.00 | 0.04 | 0.00    | 0.04 | 1.00 |
| chr3                        | 111979030    | 22 | 0.14    | 0.01 | 0.00 | 0.01    | 0.02 | 1.00 | 0.01    | 0.01 | 1.00 |
| chr2                        | 105038548    | 39 | 0.13    | 0.00 | 0.00 | 0.01    | 0.02 | 1.00 | 0.01    | 0.01 | 0.91 |
| chr9                        | 131820192    | 29 | 0.12    | 0.00 | 0.00 | 0.01    | 0.00 | 0.38 | 0.02    | 0.00 | 0.56 |
| chr11                       | 78262418     | 22 | 0.11    | 0.00 | 0.00 | 0.01    | 0.00 | 0.07 | 0.00    | 0.00 | 1.00 |
| chr8                        | 60233954     | 23 | 0.11    | 0.00 | 0.00 | 0.00    | 0.00 | 0.79 | 0.01    | 0.00 | 0.39 |
| chr20                       | 45905200     | 21 | 0.10    | 0.01 | 0.00 | 0.01    | 0.01 | 0.74 | 0.00    | 0.00 | 0.91 |
| chr7                        | 98643926     | 28 | 0.10    | 0.00 | 0.04 | 0.02    | 0.06 | 1.00 | 0.06    | 0.00 | 0.56 |
| chr12                       | 53051038     | 26 | 0.09    | 0.01 | 0.00 | 0.02    | 0.03 | 1.00 | 0.02    | 0.01 | 0.83 |
| chr11                       | 65614374     | 26 | 0.09    | 0.00 | 0.00 | 0.02    | 0.00 | 0.12 | 0.01    | 0.00 | 0.68 |
| chr15                       | 40764304     | 29 | 0.09    | 0.01 | 0.00 | 0.01    | 0.00 | 0.14 | 0.01    | 0.01 | 1.00 |
| chr22                       | 18958826     | 22 | 0.08    | 0.01 | 0.00 | 0.01    | 0.01 | 0.89 | 0.01    | 0.01 | 1.00 |
| chr1                        | 31712738     | 29 | 0.08    | 0.00 | 0.00 | 0.01    | 0.00 | 0.35 | 0.02    | 0.00 | 0.50 |
| chr20                       | 37880952     | 25 | 0.07    | 0.01 | 0.00 | 0.02    | 0.01 | 0.35 | 0.01    | 0.01 | 0.91 |
| chr1                        | 39214102     | 23 | 0.05    | 0.02 | 0.02 | 0.02    | 0.03 | 1.00 | 0.00    | 0.02 | 1.00 |
| chr22                       | 22201860     | 24 | 0.05    | 0.00 | 0.00 | 0.00    | 0.00 | 1.00 | 0.00    | 0.00 | 1.00 |
| chr17                       | 44086880     | 22 | 0.05    | 0.01 | 0.01 | 0.01    | 0.01 | 0.86 | 0.00    | 0.02 | 1.00 |
| chr17                       | 77279998     | 54 | 0.05    | 0.00 | 0.01 | 0.00    | 0.00 | 0.35 | 0.00    | 0.00 | 1.00 |
| chr3                        | 195857016    | 24 | 0.04    | 0.01 | 0.01 | 0.01    | 0.01 | 1.00 | 0.02    | 0.00 | 0.56 |
| chr22                       | 20279990     | 19 | 0.04    | 0.00 | 0.01 | 0.01    | 0.01 | 0.79 | 0.01    | 0.01 | 0.98 |
| chr22                       | 23187146     | 22 | 0.02    | 0.00 | 0.01 | 0.00    | 0.01 | 1.00 | 0.02    | 0.00 | 0.39 |
| chr21                       | 44196402     | 20 | ND      | ND   | ND   | ND      | ND   | ND   | ND      | ND   | ND   |
| chrX                        | 40329304     | 28 | ND      | ND   | ND   | ND      | ND   | ND   | ND      | ND   | ND   |
| chr17                       | 76685626     | 27 | ND      | ND   | ND   | ND      | ND   | ND   | ND      | ND   | ND   |
| chr5                        | 180101344    | 20 | ND      | ND   | ND   | ND      | ND   | ND   | ND      | ND   | ND   |
| chr8                        | 140496946    | 62 | ND      | ND   | ND   | ND      | ND   | ND   | ND      | ND   | ND   |

**Supplementary Table 10.** Indel analysis of the top 100 ranked candidate off-target loci for the parent AAVS1 ZFNs, assessed using genomic DNA from K562 cells treated with the parent ZFNs, the I479Q variant dimer, the Q481A variant dimer, or GFP control. Loci are sorted by %indels observed with the parent AAVS1 ZFN pair. Values represent individual measurements. %indels at the intended target in AAVS1 are highlighted in green and %indels at all other loci are highlighted with a red heat map. P-values for each ZFN-GFP comparison are shown to the right of each pair of indel values (see **Supplementary Note 2 for details of the statistical test**). P-values were corrected using the Benjamini-Hochburg false discovery rate method. Statistically significant p-values are highlighted in blue. ND indicates that no data were obtained due to a failed PCR or sequencing analysis failure.

| FokI domain variant | % on-target indels |   |
|---------------------|--------------------|---|
| parent              | 59.68              |   |
| - full dose         | 63.25              |   |
|                     | 61.54              |   |
| parent              | 55.39              |   |
| - half dose         | 51.62              |   |
|                     | 50.58              |   |
| R416E               | 78.02              | ← |
| R416F               | 81.32              | ← |
| R416N               | 64.13              | ← |
| S418D               | 56.91              |   |
| S418E               | 48.63              |   |
| R422H               | 60.19              |   |
| N476D               | 20.92              |   |
| N476E               | 14.53              |   |
| N476G               | 70.33              | ← |
| N476T               | 73.56              | ← |
| I479T               | 1.77               |   |
| I479Q               | 4.81               |   |
| Q481A               | 31.92              |   |
| Q481D               | 89.89              | ← |
| Q481E               | 48.98              |   |
| Q481H               | 86.78              | ← |
| K525A               | 63.12              | ← |
| K525S               | 71.12              | ← |
| K525T               | 79.44              | ← |
| K525V               | 77.79              | ← |
| N527D               | 40.64              |   |
| GFP                 | 0.01               |   |
| GFP                 | 0.01               |   |
| GFP                 | 0.08               |   |

**Supplementary Table 11.** On-target activity of variants of the PD1 ZFN dimer bearing single-residue substitutions within their FokI domain. Each variant was tested as a dimer in which both ZFNs bore the indicated substitution. ZFNs were delivered to human K562 cells via mRNA nucleofection (500 ng of each monomer), followed by genomic DNA isolation at day 3 and deep sequencing analysis for indels at the intended target. Values represent individual measurements. “Full dose” parent samples used the same 500ng dose as the variants and “half dose” parent samples used 250 ng RNA for delivery. To highlight relative signal intensities, table values are embedded in a green heat map. Arrows highlight variants that manifested activity at least as high as the average of the parent “full dose” replicates and that were characterized in follow-up studies.



| FokI domain variant | RNA dose (ng) | % indels |      |      |     | $\Sigma$ OT indels | on:off ratio |
|---------------------|---------------|----------|------|------|-----|--------------------|--------------|
|                     |               | PD1      | OT1  | OT2  | OT3 |                    |              |
| 1                   | 2             | 3        | 4    | 5    | 6   | 7                  | 8            |
| < parent >          | 1000          | 75.0     | 3.14 | 2.41 | .85 | 6.41               | 12           |
|                     | 500           | 60.8     | .28  | .30  | .13 | .72                | 84           |
| R416E               | 500           | 83.0     | .01  | .05  | .01 | .07                | 1234         |
|                     | 250           | 69.8     | .01  | .01  | .00 | .02                | 3238         |
| R416F               | 250           | 69.5     | .01  | .04  | .02 | .07                | 1032         |
| R416N               | 500           | 81.5     | .04  | .04  | .03 | .10                | 800          |
|                     | 250           | 66.2     | .01  | .01  | .01 | .03                | 2539         |
| R422H               | 500           | 55.2     | .02  | .06  | .03 | .11                | 514          |
| K448A               | 500           | 60.5     | .16  | .10  | .07 | .33                | 183          |
|                     | 250           | 43.3     | .04  | .03  | .02 | .08                | 510          |
| N476G               | 500           | 64.7     | .02  | .02  | .02 | .05                | 1287         |
|                     | 250           | 51.6     | .01  | .01  | .01 | .03                | 2011         |
| N476T               | 500           | 69.8     | .14  | .13  | .14 | .40                | 173          |
|                     | 250           | 58.8     | .04  | .03  | .05 | .12                | 495          |
| Q481D               | 250           | 81.4     | .01  | .02  | .00 | .03                | 2882         |
|                     | 125           | 63.7     | .01  | .01  | .00 | .01                | 4571         |
| Q481H               | 250           | 87.3     | .94  | .26  | .06 | 1.26               | 69           |
|                     | 125           | 75.3     | .12  | .06  | .02 | .20                | 379          |
| K525A               | 500           | 54.4     | .01  | .00  | .00 | .01                | 6421         |
| K525S               | 500           | 66.3     | .00  | .03  | .00 | .03                | 1902         |
|                     | 250           | 46.5     | .00  | .00  | .00 | .01                | 5267         |
| K525T               | 500           | 78.8     | .04  | .04  | .02 | .11                | 729          |
|                     | 250           | 63.6     | .01  | .02  | .01 | .04                | 1645         |
| K525V               | 500           | 75.6     | .01  | .03  | .01 | .05                | 1477         |
|                     | 250           | 63.9     | .01  | .03  | .01 | .04                | 1462         |
| GFP                 | 500           | .0       | .00  | .00  | .00 | .01                | NA           |

**Supplementary Table 12.** On and off-target activity of variants of the PD1 ZFN dimer bearing single-residue substitutions within their FokI domain. Each variant was tested as a dimer in which both ZFNs bore the indicated substitution (column 1, “parent” indicates the previously reported PD1 ZFN pair<sup>48</sup>). ZFNs were delivered to human K562 cells via nucleofection using the indicated amount of mRNA for each ZFN monomer (column 2), followed by genomic DNA isolation at 3 days and deep sequencing analysis for indels at the intended target. Column 3 provides % indels measured at the intended target, with columns 4-6 indicating % indels at three previously known off-target sites. Values are the average of three biological replicates. Column 7 lists the sum of off-target indels, with column 8 giving on:off-target indel ratio (= column 3 / column 7). To help highlight relative signal intensities, table values are embedded in heat maps (green – on target indels; red – off-target indels; blue – on:off ratio).

| sample number | Left ZFN |    |    |    |    |    |    | Right ZFN |       |    |    |    |    | %indels |   |        |       |       |       |       |       |   |
|---------------|----------|----|----|----|----|----|----|-----------|-------|----|----|----|----|---------|---|--------|-------|-------|-------|-------|-------|---|
|               | UID      | F1 | F2 | F3 | F4 | F5 | F6 | Σ         | UID   | F1 | F2 | F3 | F4 | F5      | Σ | BCL11A |       |       | OT1   |       |       |   |
|               |          |    |    |    |    |    |    |           |       |    |    |    |    |         |   | 100ng  | 200ng | 400ng | 100ng | 200ng | 400ng |   |
| 1             | 63007    |    |    |    |    |    |    | 0         | 63015 |    |    |    |    |         |   | 58.98  | 80.73 | 84.95 | 0.46  | 4.74  | 23.50 | ← |
| 2             | 63007    |    |    |    |    |    |    | 0         | 63016 | Q  |    |    |    |         |   | 62.36  | 79.09 | 85.79 | 0.51  | 3.29  | 19.21 | ← |
| 3             | 63007    |    |    |    |    |    |    | 0         | 63017 |    | Q  |    |    |         |   | 48.86  | 75.15 | 80.64 | 0.12  | 1.53  | 7.12  |   |
| 4             | 63007    |    |    |    |    |    |    | 0         | 63018 |    |    |    | Q  |         |   | 78.60  | 86.66 | 89.00 | 0.13  | 2.95  | 11.97 |   |
| 5             | 63007    |    |    |    |    |    |    | 0         | 65765 |    |    | Q  |    |         |   | 69.36  | 83.87 | 87.01 | 0.68  | 7.13  | 23.18 |   |
| 6             | 63007    |    |    |    |    |    |    | 0         | 65766 |    |    |    |    | Q       | 1 | 60.75  | 79.40 | 85.24 | 0.17  | 2.24  | 14.86 |   |
| 7             | 63007    |    |    |    |    |    |    | 0         | 63019 | Q  | Q  |    |    |         |   | 55.87  | 79.97 | 84.86 | 0.16  | 1.21  | 8.03  | ← |
| 8             | 63007    |    |    |    |    |    |    | 0         | 63020 | Q  |    |    | Q  |         |   | 78.13  | 87.03 | 82.04 | 0.56  | 4.16  | 15.45 |   |
| 9             | 63007    |    |    |    |    |    |    | 0         | 63021 |    | Q  |    | Q  |         |   | 78.79  | 87.20 | 90.03 | 0.30  | 3.03  | 17.29 |   |
| 10            | 63007    |    |    |    |    |    |    | 0         | 65767 |    |    | Q  |    | Q       | 2 | 70.01  | 86.05 | 89.89 | 0.06  | 0.81  | 6.92  |   |
| 11            | 63007    |    |    |    |    |    |    | 0         | 63022 | Q  | Q  |    | Q  |         | 3 | 73.04  | 87.42 | 90.72 | 0.12  | 1.20  | 4.48  | ← |
| 12            | 63007    |    |    |    |    |    |    | 0         | 65768 | Q  | Q  | Q  | Q  |         | 4 | 72.14  | 88.82 | 90.19 | 0.02  | 0.25  | 1.04  | ← |
| 13            | 63007    |    |    |    |    |    |    | 0         | 65769 | Q  | Q  |    | Q  | Q       | 4 | 62.17  | 85.31 | 91.68 | 0.03  | 0.27  | 1.41  |   |
| 14            | 63007    |    |    |    |    |    |    | 0         | 65770 | Q  | Q  | Q  | Q  | Q       | 5 | 64.47  | 84.45 | 90.46 | 0.01  | 0.05  | 0.38  | ← |
| 15            | 63008    | Q  |    |    |    |    |    | 1         | 63015 |    |    |    |    |         |   | 50.47  | 75.32 | 81.89 | 0.25  | 2.92  | 13.29 |   |
| 16            | 63009    |    | Q  |    |    |    |    | 1         | 63015 |    |    |    |    |         |   | 45.48  | 80.85 | 83.89 | 0.63  | 3.35  | 17.78 |   |
| 17            | 63010    |    |    |    | Q  |    |    | 1         | 63015 |    |    |    |    |         |   | 45.10  | 71.16 | 77.85 | 0.16  | 2.53  | 12.91 |   |
| 18            | 65751    |    | Q  |    |    |    |    | 1         | 63015 |    |    |    |    |         |   | 53.08  | 81.94 | 85.18 | 0.22  | 2.67  | 15.21 |   |
| 19            | 65752    |    |    | Q  |    |    |    | 1         | 63015 |    |    |    |    |         |   | 45.06  | 74.65 | 84.52 | 0.34  | 1.97  | 18.19 |   |
| 20            | 65753    |    |    |    |    | Q  |    | 1         | 63015 |    |    |    |    |         |   | 53.87  | 81.07 | 84.04 | 0.23  | 1.94  | 11.44 |   |
| 21            | 63011    | Q  | Q  |    |    |    |    | 2         | 63015 |    |    |    |    |         |   | 48.79  | 78.31 | 87.88 | 0.20  | 0.95  | 7.49  |   |
| 22            | 63012    | Q  |    |    | Q  |    |    | 2         | 63015 |    |    |    |    |         |   | 27.74  | 63.38 | 78.44 | 0.07  | 0.97  | 5.16  |   |
| 23            | 63013    |    | Q  | Q  | Q  |    |    | 2         | 63015 |    |    |    |    |         |   | 33.78  | 67.09 | 82.86 | 0.14  | 0.97  | 6.29  |   |
| 24            | 65754    |    | Q  | Q  |    |    |    | 2         | 63015 |    |    |    |    |         |   | 35.25  | 69.76 | 81.14 | 0.08  | 0.79  | 3.99  |   |
| 25            | 65755    |    | Q  |    |    | Q  |    | 2         | 63015 |    |    |    |    |         |   | 34.35  | 67.85 | 83.35 | 0.13  | 0.68  | 6.95  |   |
| 26            | 65756    |    |    | Q  | Q  |    |    | 2         | 63015 |    |    |    |    |         |   | 20.81  | 66.79 | 81.36 | 0.02  | 0.25  | 2.25  |   |
| 27            | 63014    | Q  | Q  | Q  |    |    |    | 3         | 63015 |    |    |    |    |         |   | 23.12  | 61.04 | 76.50 | 0.07  | 0.32  | 3.95  |   |
| 28            | 65757    | Q  | Q  | Q  | Q  |    |    | 3         | 63015 |    |    |    |    |         |   | 20.81  | 57.68 | 75.40 | 0.06  | 0.15  | 1.53  |   |
| 29            | 65758    | Q  | Q  | Q  | Q  |    |    | 4         | 63015 |    |    |    |    |         |   | 21.13  | 53.08 | 75.41 | 0.04  | 0.29  | 3.02  |   |
| 30            | 65759    | Q  | Q  | Q  | Q  |    |    | 4         | 63015 |    |    |    |    |         |   | 9.28   | 36.97 | 63.30 | 0.01  | 0.09  | 0.78  |   |
| 31            | 65760    | Q  | Q  | Q  | Q  |    |    | 4         | 63015 |    |    |    |    |         |   | 10.00  | 35.17 | 61.63 | 0.02  | 0.26  | 0.43  |   |
| 32            | 65761    | Q  | Q  | Q  | Q  | Q  |    | 5         | 63015 |    |    |    |    |         |   | 6.00   | 31.75 | 61.33 | 0.01  | 0.17  | 0.63  |   |
| 33            | 65762    | Q  | Q  | Q  | Q  | Q  |    | 5         | 63015 |    |    |    |    |         |   | 5.02   | 25.27 | 57.73 | 0.01  | 0.06  | 0.64  |   |
| 34            | 65763    | Q  | Q  | Q  | Q  | Q  |    | 5         | 63015 |    |    |    |    |         |   | 1.38   | 14.04 | 39.75 | 0.02  | 0.00  | 0.16  |   |
| 35            | 65764    | Q  | Q  | Q  | Q  | Q  |    | 6         | 63015 |    |    |    |    |         |   | 1.47   | 9.26  | 30.20 | 0.00  | 0.01  | 0.09  |   |
| 36            | GFP      |    |    |    |    |    | NA |           | NA    |    |    |    |    | NA      |   | 0.02   | 0.02  | 0.01  | 0.01  | 0.00  | 0.00  |   |

**Supplementary Table 13.** On and off-target activity of variants of the BCL11A ZFN dimer bearing the R(-5)Q substitution in the indicated zinc fingers. ZFNs were delivered to human K562 cells via mRNA nucleofection, followed by genomic DNA isolation at day 3 and deep sequencing analysis for indels at the intended target or a known off-target site. The “Left ZFN” and “Right ZFN” panels summarize the design properties of each tested ZFN, with “Q” indicating an Arg→Gln mutation at position -5 of the indicated finger and the summation symbol (Σ) indicating the total number of substituted fingers. Unique identifiers for each construct are shown in the columns labeled “UID”. The “% indels” panel provides the % indels measured for each construct at the BCL11A on-target and also a known off-target (OT1) as a function of delivered mRNA dose (100ng, 200ng or 400ng). Values represent individual measurements. To help highlight relative signal intensities, table values are embedded in heat maps (green – on target indels; red – off-target indels). Arrows highlight samples that were subsequently tested in triplicate and shown in **Figure 3c**.

| Right ZFP | % indels |       |      | $\Sigma$ OT indels | on:off ratio |
|-----------|----------|-------|------|--------------------|--------------|
|           | BCL11A   | OT1   | OT2  |                    |              |
| 1         | 2        | 3     | 4    | 5                  | 6            |
| Parent    | 86.0     | 20.26 | 2.34 | 22.60              | 3.8          |
| 1x R(-5)Q | 87.3     | 13.39 | .94  | 14.33              | 6.1          |
| 2x R(-5)Q | 84.5     | 5.39  | .26  | 5.65               | 15           |
| 3x R(-5)Q | 92.2     | 5.79  | .25  | 6.04               | 15           |
| 4x R(-5)Q | 91.5     | 1.57  | .12  | 1.69               | 54           |
| 5x R(-5)Q | 90.4     | .26   | .04  | .30                | 301          |
| GFP       | .0       | .01   | .00  | .01                | NA           |

**Supplementary Table 14.** Tabular format of data graphed in **Figure 3c**. Each value is the average of three biological replicate 400ng transfections in human K562 cells. ZFNs tested in this study were those highlighted with an arrow in **Supplementary Table 13**.

| Left ZFN |           | Right ZFN |           | % indels |      |     | $\Sigma$ OT indels | on:off ratio |
|----------|-----------|-----------|-----------|----------|------|-----|--------------------|--------------|
| FokI     | ZFP       | FokI      | ZFP       | BCL11A   | OT1  | OT2 |                    |              |
| 1        | 2         | 3         | 4         | 5        | 6    | 7   | 8                  | 9            |
| Parent   | Parent    | Parent    | Parent    | 86.87    | 5.01 | .31 | 5.33               | 16.3         |
| Parent   | Parent    | R416S     | Parent    | 86.79    | .57  | .07 | .64                | 135.9        |
| Parent   | 3x R(-5)Q | R416S     | 3x R(-5)Q | 86.29    | .07  | .01 | .09                | 1006         |
| Parent   | 3x R(-5)Q | R416S     | 4x R(-5)Q | 86.32    | .02  | .00 | .02                | 4822         |
| Parent   | 3x R(-5)Q | R416S     | 5x R(-5)Q | 86.31    | .00  | .01 | .02                | 5137         |
| Parent   | 3x R(-5)Q | K525S     | 4x R(-5)Q | 83.47    | .01  | .00 | .01                | 5878         |
| GFP      |           |           |           | 0.01     | .01  | .01 | .02                | NA           |

**Supplementary Table 15.** On-target and off-target activity of BCL11A ZFN variants containing different combinations of zinc finger backbone variants and FokI variants expressed in human CD34+ hematopoietic stem and progenitor cells. Values represent individual measurements. This clinically relevant cell type tends to show lower off-target activity and more tolerance for R(-5)Q mutations in the left ZFN than did the K562 cell line utilized for the initial experiments shown in **Supplementary Figure 7 and Supplementary Tables 13-14**. For the left ZFN, “3xR(-5)Q” indicates substitutions within fingers 1, 3, and 5. For the right ZFN constructs, substituted fingers are: 3xR(-5)Q - fingers 1, 2, and 4; 4xR(-5)Q - fingers 1, 2, 3, and 4; 5xR(-5)Q - all fingers.



| ZFN Pair | Left ZFN |           | Right ZFN |           | TCRα on-target |       |       | OT1     |       |       |   |
|----------|----------|-----------|-----------|-----------|----------------|-------|-------|---------|-------|-------|---|
|          | FokI     | ZFP       | FokI      | ZFP       | %indels        |       |       | %indels |       |       |   |
| 1        | Parent   | Parent    | Parent    | Parent    | 95.45          | 96.24 | 96.03 | 6.25    | 38.88 | 75.22 | ← |
| 2        | Parent   | Parent    | Parent    | 3x R(-5)Q | 92.85          | 94.95 | 96.10 | 0.10    | 0.68  | 16.28 |   |
| 3        | Parent   | Parent    | R416E     | Parent    | 63.01          | 88.89 | 91.66 | 0.06    | 0.89  | 12.39 |   |
| 4        | Parent   | Parent    | R416E     | 3x R(-5)Q | 41.66          | 76.80 | 88.29 | 0.01    | 0.01  | 0.12  |   |
| 5        | Parent   | Parent    | Q481E     | Parent    | 81.94          | 92.79 | 95.53 | 0.05    | 0.22  | 4.96  |   |
| 6        | Parent   | Parent    | Q481E     | 3x R(-5)Q | 64.60          | ND    | 94.82 | 0.00    | 0.06  | 0.02  |   |
| 7        | Parent   | Parent    | K525S     | Parent    | 76.56          | 92.60 | 94.51 | 0.05    | 1.29  | 16.67 |   |
| 8        | Parent   | Parent    | K525S     | 3x R(-5)Q | 58.09          | 88.11 | 93.88 | 0.00    | 0.00  | 0.19  |   |
| 9        | Parent   | 3x R(-5)Q | Parent    | Parent    | 95.38          | 96.97 | 96.47 | 0.45    | 4.13  | 32.74 |   |
| 10       | Parent   | 3x R(-5)Q | Parent    | 3x R(-5)Q | 92.63          | ND    | 96.22 | 0.01    | 0.20  | 2.65  |   |
| 11       | Parent   | 3x R(-5)Q | R416E     | Parent    | 94.28          | ND    | 97.26 | 0.02    | 0.17  | 0.35  |   |
| 12       | Parent   | 3x R(-5)Q | R416E     | 3x R(-5)Q | 88.98          | 94.24 | 96.65 | 0.01    | 0.03  | 0.01  | ← |
| 13       | Parent   | 3x R(-5)Q | Q481E     | Parent    | 91.62          | 96.57 | 97.67 | 0.00    | 0.01  | 0.06  | ← |
| 14       | Parent   | 3x R(-5)Q | Q481E     | 3x R(-5)Q | 87.87          | 95.39 | 96.74 | 0.00    | 0.01  | 0.02  | ← |
| 15       | Parent   | 3x R(-5)Q | K525S     | Parent    | 94.46          | 95.40 | 95.61 | 0.00    | 0.10  | 0.66  |   |
| 16       | Parent   | 3x R(-5)Q | K525S     | 3x R(-5)Q | 91.79          | 96.33 | ND    | 0.00    | 0.01  | 0.04  |   |
| 17       | R416E    | Parent    | Parent    | Parent    | 95.69          | 96.93 | 97.44 | 2.08    | 25.33 | 75.31 |   |
| 18       | R416E    | Parent    | Parent    | 3x R(-5)Q | 92.58          | 96.06 | 96.80 | 0.02    | 0.26  | 4.87  |   |
| 19       | R416E    | Parent    | R416E     | Parent    | 93.19          | 95.66 | 96.65 | 0.05    | 0.90  | 19.92 |   |
| 20       | R416E    | Parent    | R416E     | 3x R(-5)Q | 77.24          | 92.52 | 94.97 | 0.00    | 0.06  | 0.22  |   |
| 21       | R416E    | Parent    | Q481E     | Parent    | 86.79          | 95.41 | 97.49 | 0.01    | 0.11  | 0.65  |   |
| 22       | R416E    | Parent    | Q481E     | 3x R(-5)Q | 71.32          | 93.01 | 96.27 | 0.01    | 0.00  | 0.04  |   |
| 23       | R416E    | Parent    | K525S     | Parent    | 91.45          | 96.57 | 97.59 | 0.04    | 0.35  | 9.52  |   |
| 24       | R416E    | Parent    | K525S     | 3x R(-5)Q | 82.46          | 94.74 | 96.76 | 0.00    | 0.00  | 0.04  | ← |
| 25       | R416E    | 3x R(-5)Q | Parent    | Parent    | 79.74          | 92.67 | 93.38 | 0.06    | 0.32  | 4.49  |   |
| 26       | R416E    | 3x R(-5)Q | Parent    | 3x R(-5)Q | 74.63          | 90.47 | 91.39 | 0.02    | 0.06  | 0.41  |   |
| 27       | R416E    | 3x R(-5)Q | R416E     | Parent    | 94.26          | 97.58 | 96.69 | 0.03    | 0.06  | 0.26  |   |
| 28       | R416E    | 3x R(-5)Q | R416E     | 3x R(-5)Q | 89.95          | 95.73 | 96.84 | 0.00    | 0.01  | 0.00  | ← |
| 29       | R416E    | 3x R(-5)Q | Q481E     | Parent    | 69.12          | 93.61 | 95.10 | 0.00    | 0.02  | 0.11  |   |
| 30       | R416E    | 3x R(-5)Q | Q481E     | 3x R(-5)Q | 71.54          | 91.00 | 93.86 | 0.00    | 0.00  | 0.02  |   |
| 31       | R416E    | 3x R(-5)Q | K525S     | Parent    | 90.80          | 96.43 | 96.70 | 0.01    | 0.04  | 0.16  |   |
| 32       | R416E    | 3x R(-5)Q | K525S     | 3x R(-5)Q | 90.00          | 95.39 | 97.05 | 0.01    | 0.01  | 0.00  | ← |
| 33       | Q481E    | Parent    | Parent    | Parent    | 88.49          | 95.57 | 96.72 | 0.03    | 1.10  | 22.57 |   |
| 34       | Q481E    | Parent    | Parent    | 3x R(-5)Q | 64.77          | 88.15 | 95.46 | 0.01    | 0.00  | 0.10  |   |
| 35       | Q481E    | Parent    | R416E     | Parent    | 46.58          | 77.85 | 89.47 | 0.00    | 0.01  | 0.39  |   |
| 36       | Q481E    | Parent    | R416E     | 3x R(-5)Q | 27.48          | 59.51 | 81.63 | 0.01    | 0.00  | 0.00  |   |
| 37       | Q481E    | Parent    | Q481E     | Parent    | 43.36          | 84.24 | 90.98 | 0.00    | 0.01  | 0.03  |   |
| 38       | Q481E    | Parent    | Q481E     | 3x R(-5)Q | 27.48          | 56.71 | 83.70 | 0.01    | 0.00  | 0.02  |   |
| 39       | Q481E    | Parent    | K525S     | Parent    | 54.68          | 83.39 | 93.36 | 0.00    | 0.00  | 0.12  |   |
| 40       | Q481E    | Parent    | K525S     | 3x R(-5)Q | 40.66          | 72.35 | 88.83 | 0.00    | 0.01  | 0.00  |   |
| 41       | Q481E    | 3x R(-5)Q | Parent    | Parent    | 52.30          | 90.89 | 94.18 | 0.00    | 0.01  | 0.10  |   |
| 42       | Q481E    | 3x R(-5)Q | Parent    | 3x R(-5)Q | 38.74          | 82.99 | 93.63 | 0.01    | 0.00  | 0.00  |   |
| 43       | Q481E    | 3x R(-5)Q | R416E     | Parent    | 70.79          | 93.43 | 96.13 | 0.00    | 0.00  | 0.00  | ← |
| 44       | Q481E    | 3x R(-5)Q | R416E     | 3x R(-5)Q | 49.81          | 86.44 | 91.76 | 0.00    | 0.00  | 0.00  |   |
| 45       | Q481E    | 3x R(-5)Q | Q481E     | Parent    | 35.03          | 82.94 | 93.16 | 0.01    | 0.01  | 0.00  |   |
| 46       | Q481E    | 3x R(-5)Q | Q481E     | 3x R(-5)Q | 21.13          | 72.84 | ND    | 0.01    | 0.01  | 0.01  |   |
| 47       | Q481E    | 3x R(-5)Q | K525S     | Parent    | 55.38          | 91.58 | 91.28 | 0.00    | 0.01  | 0.01  |   |
| 48       | Q481E    | 3x R(-5)Q | K525S     | 3x R(-5)Q | 39.04          | 85.33 | 94.37 | 0.01    | 0.00  | 0.00  |   |
| 49       | K525S    | Parent    | Parent    | Parent    | 94.30          | 96.75 | 94.04 | 0.33    | 6.27  | 55.29 |   |
| 50       | K525S    | Parent    | Parent    | 3x R(-5)Q | 88.95          | 95.10 | 93.36 | 0.01    | 0.07  | 1.39  |   |
| 51       | K525S    | Parent    | R416E     | Parent    | 69.54          | 89.41 | 93.25 | 0.02    | 0.16  | 1.58  |   |
| 52       | K525S    | Parent    | R416E     | 3x R(-5)Q | 43.32          | 81.81 | 91.00 | 0.01    | 0.00  | 0.00  |   |
| 53       | K525S    | Parent    | Q481E     | Parent    | 69.24          | 91.49 | 94.59 | 0.01    | 0.04  | 0.00  |   |
| 54       | K525S    | Parent    | Q481E     | 3x R(-5)Q | 47.56          | 80.23 | 92.42 | 0.01    | 0.01  | 0.01  |   |
| 55       | K525S    | Parent    | K525S     | Parent    | 84.24          | 92.86 | 95.10 | 0.00    | 0.07  | 0.34  |   |
| 56       | K525S    | Parent    | K525S     | 3x R(-5)Q | 59.06          | 87.95 | 93.39 | 0.01    | 0.00  | 0.00  |   |
| 57       | K525S    | 3x R(-5)Q | Parent    | Parent    | 85.92          | 94.92 | 92.50 | 0.01    | 0.03  | 2.16  |   |
| 58       | K525S    | 3x R(-5)Q | Parent    | 3x R(-5)Q | 78.57          | 88.72 | 95.81 | 0.01    | 0.02  | 0.15  |   |
| 59       | K525S    | 3x R(-5)Q | R416E     | Parent    | 92.84          | 97.71 | 97.76 | 0.01    | 0.00  | 0.04  | ← |
| 60       | K525S    | 3x R(-5)Q | R416E     | 3x R(-5)Q | 87.25          | 91.59 | 96.61 | 0.00    | 0.00  | 0.00  | ← |
| 61       | K525S    | 3x R(-5)Q | Q481E     | Parent    | 79.54          | 88.74 | 96.47 | 0.01    | 0.01  | 0.01  | ← |
| 62       | K525S    | 3x R(-5)Q | Q481E     | 3x R(-5)Q | 62.41          | 91.01 | 94.81 | 0.00    | 0.00  | 0.00  | ← |
| 63       | K525S    | 3x R(-5)Q | K525S     | Parent    | 89.91          | 96.22 | 97.42 | 0.00    | 0.01  | 0.06  | ← |
| 64       | K525S    | 3x R(-5)Q | K525S     | 3x R(-5)Q | 84.83          | 94.76 | 96.63 | 0.01    | 0.00  | 0.00  | ← |
| GFP      |          |           |           |           | 0.00           | 0.01  | 0.01  | 0.00    | 0.01  | 0.01  |   |

**Supplementary Table 16.** On and off-target activity of variants of the TCR $\alpha$  ZFN dimer bearing the indicated FokI domain variants and R(-5)Q substitutions in one or both ZFNs as indicated. ZFNs were delivered to human K562 cells via mRNA nucleofection, followed by genomic DNA isolation at day 3 and deep sequencing analysis for indels at the intended target or four off-target sites. The “Left ZFN” and “Right ZFN” panels summarize the design properties of each tested ZFN. For details see **Figure 4b**. Values represent individual measurements. The “% indels” panel provides the % indels measured for each construct at the TCR $\alpha$  on-target and also a known off-target (OT1) as a function of delivered mRNA dose (100ng, 200ng or 400ng). To help highlight relative signal intensities, table values are embedded in heat maps (green – on target indels; red – off-target indels). Dimers highlighted by arrows were further characterized by an oligonucleotide capture assay to assess their genome-wide specificity.

| ZFN pair 13 oligo capture |            |              | ZFN pair 13 |      |      |
|---------------------------|------------|--------------|-------------|------|------|
| hg38 coordinates          |            | integrations | %indels     |      | pval |
|                           |            |              | ZFN         | GFP  |      |
| chr14                     | 22550608*  | 3583         | 97.31       | 0.00 | 0.00 |
| chr17                     | 362912*    | 62           | 0.06        | 0.00 | 0.02 |
| chr3                      | 52219054*  | 10           | 0.01        | 0.03 | 1.00 |
| chr15                     | 44711562   | 6            | 0.01        | 0.02 | 0.97 |
| chr19                     | 6929724    | 6            | 0.02        | 0.00 | 0.22 |
| chr9                      | 128878058* | 5            | 0.12        | 0.00 | 0.00 |
| chr11                     | 65980906   | 5            | ND          | ND   | ND   |
| chr12                     | 53004488*  | 5            | 0.01        | 0.03 | 1.00 |
| chr10                     | 42079890   | 4            | ND          | ND   | ND   |
| chr10                     | 42081716   | 4            | ND          | ND   | ND   |
| chr1                      | 143197542  | 4            | ND          | ND   | ND   |
| chr1                      | 143268830  | 4            | ND          | ND   | ND   |
| chr3                      | 90590546   | 4            | ND          | ND   | ND   |
| chr7                      | 158413558* | 4            | 0.05        | 0.02 | 0.10 |
| chr8                      | 73445383   | 4            | 0.06        | 0.03 | 0.28 |

| ZFN pair 59 oligo capture |            |              | ZFN pair 59 |      |      |
|---------------------------|------------|--------------|-------------|------|------|
| hg38 coordinates          |            | integrations | %indels     |      | pval |
|                           |            |              | ZFN         | GFP  |      |
| chr14                     | 22550604*  | 4178         | 96.33       | 0.00 | 0.00 |
| chr9                      | 128878058* | 25           | 0.17        | 0.01 | 0.00 |
| chr17                     | 362908*    | 16           | 0.01        | 0.03 | 1.00 |
| chr19                     | 35309582*  | 6            | 0.02        | 0.02 | 0.57 |
| chr17                     | 26881268   | 3            | ND          | ND   | ND   |
| chr3                      | 185910172  | 3            | ND          | ND   | ND   |
| chr6                      | 170171158  | 3            | ND          | ND   | ND   |
| chr9                      | 114733852  | 3            | 0.07        | 0.03 | 0.21 |

| ZFN pair 60 oligo capture |           |              | ZFN pair 60 |      |      |
|---------------------------|-----------|--------------|-------------|------|------|
| hg38 coordinates          |           | integrations | %indels     |      | pval |
|                           |           |              | ZFN         | GFP  |      |
| chr14                     | 22550604* | 4247         | 97.00       | 0.00 | 0.00 |
| chr2                      | 15345444  | 3            | ND          | ND   | ND   |
| chr21                     | 8990878   | 3            | 0.12        | 0.07 | 0.52 |

| ZFN pair 14 oligo capture |            |              | ZFN pair 14 |      |      |
|---------------------------|------------|--------------|-------------|------|------|
| hg38 coordinates          |            | integrations | %indels     |      | pval |
|                           |            |              | ZFN         | GFP  |      |
| chr14                     | 22550604*  | 7964         | 98.21       | 0.00 | 0.00 |
| chr17                     | 362912*    | 85           | 0.06        | 0.03 | 0.81 |
| chr14                     | 90113594   | 12           | 0.01        | 0.00 | 0.59 |
| chr3                      | 52219056*  | 6            | 0.01        | 0.03 | 1.00 |
| chr1                      | 109667898  | 6            | 0.00        | 0.01 | 1.00 |
| chr1                      | 157197150  | 6            | ND          | ND   | ND   |
| chr6                      | 31769916*  | 6            | 0.01        | 0.00 | 0.68 |
| chr1                      | 143204642  | 6            | ND          | ND   | ND   |
| chr9                      | 131231218  | 6            | ND          | ND   | ND   |
| chr17                     | 26603966   | 6            | 0.00        | 0.01 | 1.00 |
| chr6                      | 43246754   | 5            | 0.01        | 0.01 | 1.00 |
| chr19                     | 5714676    | 5            | ND          | ND   | ND   |
| chr2                      | 23958828   | 5            | 0.04        | 0.03 | 1.00 |
| chr6                      | 150872954  | 5            | 0.01        | 0.02 | 1.00 |
| chr6                      | 27639956   | 5            | ND          | ND   | ND   |
| chr8                      | 91295868   | 5            | 0.00        | 0.00 | 0.68 |
| chr7                      | 158413560* | 5            | 0.02        | 0.02 | 1.00 |
| chr1                      | 17816562   | 4            | 0.00        | 0.01 | 1.00 |
| chr1                      | 178369132  | 4            | 0.02        | 0.00 | 0.59 |
| chr1                      | 178369156  | 4            | 0.00        | 0.05 | 1.00 |
| chr10                     | 46389424   | 4            | 0.00        | 0.00 | 1.00 |
| chr10                     | 47470352   | 4            | 0.00        | 0.02 | 1.00 |
| chr11                     | 113374268  | 4            | 0.01        | 0.04 | 1.00 |
| chr12                     | 57858376   | 4            | ND          | ND   | ND   |
| chr14                     | 63256990   | 4            | ND          | ND   | ND   |
| chr15                     | 43609808   | 4            | ND          | ND   | ND   |
| chr15                     | 43709280   | 4            | ND          | ND   | ND   |
| chr21                     | 37143208   | 4            | ND          | ND   | ND   |
| chr3                      | 64835606   | 4            | 0.00        | 0.00 | 1.00 |
| chr7                      | 65183196   | 4            | 0.00        | 0.05 | 1.00 |
| chr7                      | 65689530   | 4            | 0.02        | 0.00 | 0.59 |

| ZFN pair 63 oligo capture |            |              | ZFN pair 63 |      |      |
|---------------------------|------------|--------------|-------------|------|------|
| hg38 coordinates          |            | integrations | %indels     |      | pval |
|                           |            |              | ZFN         | GFP  |      |
| chr14                     | 22550604*  | 3379         | 96.65       | 0.00 | 0.00 |
| chr9                      | 128878054* | 36           | 0.09        | 0.01 | 0.09 |
| chr17                     | 362912*    | 14           | 0.04        | 0.02 | 0.38 |
| chr3                      | 52219056*  | 6            | 0.06        | 0.00 | 0.05 |
| chr1                      | 34213558   | 5            | 0.22        | 0.12 | 0.13 |
| chr2                      | 218506758  | 5            | ND          | ND   | ND   |
| chr20                     | 47319050   | 4            | 0.01        | 0.02 | 0.83 |
| chr10                     | 38177402   | 4            | 0.07        | 0.42 | 1.00 |
| chr12                     | 55494752   | 4            | ND          | ND   | ND   |
| chr17                     | 35586862   | 4            | 0.04        | 0.02 | 0.38 |
| chr20                     | 39075318   | 4            | 0.05        | 0.05 | 0.83 |
| chr20                     | 39075358   | 4            | 0.00        | 0.01 | 1.00 |

**Supplementary Table 17.** Table view of oligonucleotide duplex capture results for variant pairs 13, 14, 59, 60 and 63 (columns 1-3 of each table), with indel levels observed at these loci in genomic DNA from T-cells treated with ZFNs or a



GFP control (columns 4-5). Integrations are the total unique integrations from four biological replicates and indel values represent an individual measurement. Loci are ranked in order of decreasing number of capture events, with the intended target locus at top. Column 6 in each table provides p-values for each corresponding ZFN-GFP comparison. See **Supplementary Note 2** for details of the statistical test.

| ZFN Pair 1 oligo capture |              |      | ZFN pair 1     |      |      | ZFN pair 13    |      |      | ZFN pair 14    |      |      | ZFN pair 59    |      |      | ZFN pair 60    |      |      | ZFN pair 63    |      |      |
|--------------------------|--------------|------|----------------|------|------|----------------|------|------|----------------|------|------|----------------|------|------|----------------|------|------|----------------|------|------|
| hg38 coordinates         | integrations |      | %indels<br>ZFN | GFP  | pval | %indels<br>ZFN | GFP  | pval | %indels<br>ZFN | GFP  | pval | %indels<br>ZFN | GFP  | pval | %indels<br>ZFN | GFP  | pval | %indels<br>ZFN | GFP  | pval |
| chr14                    | 22550604     | 3185 | 96.60          | 0.00 | 0.00 | 97.31          | 0.00 | 0.00 | 98.21          | 0.00 | 0.00 | 96.33          | 0.00 | 0.00 | 97.00          | 0.00 | 0.00 | 96.65          | 0.00 | 0.00 |
| chr14                    | 49621284     | 135  | 10.74          | 0.00 | 0.00 | 0.06           | 0.00 | 0.05 | 0.01           | 0.00 | 0.61 | 0.03           | 0.00 | 0.25 | 0.01           | 0.00 | 0.51 | 0.07           | 0.00 | 0.03 |
| chr9                     | 13565900     | 359  | 10.42          | 0.00 | 0.00 | 0.02           | 0.01 | 0.18 | 0.00           | 0.01 | 0.92 | 0.00           | 0.01 | 0.92 | 0.00           | 0.00 | 0.92 | 0.00           | 0.01 | 0.92 |
| chr9                     | 128878060    | 428  | 5.52           | 0.00 | 0.00 | 0.12           | 0.00 | 0.00 | 0.00           | 0.00 | 1.00 | 0.12           | 0.00 | 0.00 | 0.02           | 0.00 | 0.51 | 0.25           | 0.00 | 0.00 |
| chr10                    | 132515136    | 79   | 2.77           | 0.00 | 0.00 | 0.03           | 0.01 | 0.36 | 0.04           | 0.00 | 0.55 | 0.01           | 0.01 | 0.76 | 0.03           | 0.01 | 0.51 | 0.03           | 0.01 | 0.44 |
| chr8                     | 60701070     | 31   | 1.64           | 0.00 | 0.00 | 0.08           | 0.00 | 0.05 | 0.00           | 0.00 | 1.00 | 0.01           | 0.00 | 0.37 | 0.01           | 0.00 | 0.51 | 0.02           | 0.00 | 0.33 |
| chr6                     | 118713042    | 52   | 1.17           | 0.04 | 0.00 | 0.12           | 0.01 | 0.00 | 0.01           | 0.01 | 0.97 | 0.04           | 0.01 | 0.25 | 0.04           | 0.01 | 0.47 | 0.04           | 0.01 | 0.20 |
| chr15                    | 37345596     | 45   | 0.84           | 0.14 | 0.00 | 0.02           | 0.05 | 1.00 | 0.00           | 0.08 | 1.00 | 0.00           | 0.08 | 1.00 | 0.02           | 0.05 | 1.00 | 0.02           | 0.08 | 1.00 |
| chr19                    | 33383802     | 94   | 0.51           | 0.00 | 0.00 | 0.00           | 0.04 | 1.00 | 0.09           | 0.02 | 0.55 | 0.02           | 0.02 | 0.76 | 0.02           | 0.02 | 0.97 | 0.00           | 0.02 | 1.00 |
| chr2                     | 26018400     | 91   | 0.47           | 0.01 | 0.00 | 0.03           | 0.01 | 0.36 | 0.03           | 0.03 | 1.00 | 0.01           | 0.00 | 0.37 | 0.00           | 0.02 | 1.00 | 0.02           | 0.03 | 1.00 |
| chr6                     | 44255520     | 142  | 0.42           | 0.00 | 0.00 | 0.03           | 0.00 | 0.36 | 0.00           | 0.00 | 1.00 | 0.01           | 0.01 | 0.76 | 0.01           | 0.00 | 0.51 | 0.00           | 0.01 | 1.00 |
| chr6                     | 110569182    | 67   | 0.37           | 0.03 | 0.00 | 0.03           | 0.01 | 0.36 | 0.00           | 0.03 | 1.00 | 0.02           | 0.04 | 1.00 | 0.02           | 0.05 | 1.00 | 0.03           | 0.01 | 0.44 |
| chr9                     | 98054342     | 65   | 0.37           | 0.04 | 0.00 | 0.15           | 0.02 | 0.01 | 0.02           | 0.03 | 1.00 | 0.11           | 0.01 | 0.06 | 0.03           | 0.02 | 0.92 | 0.03           | 0.04 | 1.00 |
| chr22                    | 23280666     | 78   | 0.35           | 0.06 | 0.00 | 0.01           | 0.04 | 1.00 | 0.00           | 0.00 | 1.00 | 0.02           | 0.00 | 0.37 | 0.01           | 0.04 | 1.00 | 0.05           | 0.00 | 0.20 |
| chr12                    | 109930438    | 163  | 0.34           | 0.06 | 0.00 | 0.07           | 0.00 | 0.01 | 0.04           | 0.00 | 0.53 | 0.10           | 0.00 | 0.00 | 0.04           | 0.00 | 0.47 | 0.04           | 0.00 | 0.13 |
| chr5                     | 36839152     | 43   | 0.30           | 0.00 | 0.00 | 0.00           | 0.00 | 1.00 | 0.00           | 0.00 | 1.00 | 0.00           | 0.00 | 1.00 | 0.00           | 0.00 | 1.00 | 0.00           | 0.00 | 1.00 |
| chr16                    | 77191236     | 50   | 0.26           | 0.00 | 0.00 | 0.02           | 0.00 | 0.36 | 0.02           | 0.00 | 0.61 | 0.03           | 0.00 | 0.30 | 0.00           | 0.00 | 1.00 | 0.02           | 0.00 | 0.44 |
| chr2                     | 26785730     | 131  | 0.22           | 0.02 | 0.00 | 0.01           | 0.00 | 0.36 | 0.01           | 0.00 | 0.61 | 0.01           | 0.00 | 0.37 | 0.01           | 0.00 | 0.51 | 0.04           | 0.00 | 0.16 |
| chr6                     | 52934244     | 49   | 0.22           | 0.01 | 0.00 | 0.01           | 0.01 | 0.80 | 0.00           | 0.01 | 1.00 | 0.02           | 0.00 | 0.30 | 0.01           | 0.01 | 1.00 | 0.01           | 0.00 | 0.44 |
| chr7                     | 149866310    | 32   | 0.20           | 0.02 | 0.00 | ND             | ND   | ND   | 0.01           | 0.02 | 1.00 | 0.01           | 0.03 | 1.00 | 0.00           | 0.03 | 1.00 | 0.00           | 0.04 | 1.00 |
| chr14                    | 60248818     | 40   | 0.20           | 0.00 | 0.00 | 0.00           | 0.00 | 1.00 | 0.01           | 0.00 | 0.61 | 0.02           | 0.00 | 0.30 | 0.02           | 0.00 | 0.47 | 0.06           | 0.00 | 0.16 |
| chr9                     | 136086174    | 65   | 0.19           | 0.01 | 0.00 | 0.01           | 0.04 | 1.00 | 0.00           | 0.03 | 1.00 | 0.01           | 0.04 | 1.00 | 0.00           | 0.04 | 1.00 | 0.02           | 0.03 | 1.00 |
| chr15                    | 45153400     | 33   | 0.18           | 0.01 | 0.00 | 0.03           | 0.01 | 0.36 | 0.00           | 0.04 | 1.00 | 0.00           | 0.04 | 1.00 | 0.04           | 0.01 | 0.47 | 0.01           | 0.01 | 0.90 |
| chr20                    | 25223350     | 33   | 0.16           | 0.00 | 0.05 | 0.00           | 0.00 | 1.00 | 0.00           | 0.00 | 1.00 | 0.00           | 0.00 | 1.00 | 0.00           | 0.00 | 1.00 | 0.00           | 0.00 | 1.00 |
| chr11                    | 62401684     | 29   | 0.14           | 0.04 | 0.05 | 0.00           | 0.00 | 1.00 | 0.00           | 0.00 | 1.00 | 0.00           | 0.00 | 1.00 | 0.00           | 0.00 | 1.00 | 0.00           | 0.00 | 1.00 |
| chr20                    | 60891662     | 44   | 0.14           | 0.01 | 0.00 | 0.01           | 0.02 | 1.00 | 0.03           | 0.02 | 0.80 | 0.00           | 0.02 | 1.00 | 0.02           | 0.02 | 0.96 | 0.02           | 0.02 | 0.90 |
| chr12                    | 21752278     | 41   | 0.12           | 0.00 | 0.00 | 0.01           | 0.01 | 0.68 | 0.02           | 0.04 | 1.00 | 0.02           | 0.01 | 0.53 | 0.01           | 0.03 | 1.00 | 0.02           | 0.02 | 1.00 |
| chr17                    | 79736684     | 397  | 0.11           | 0.01 | 0.00 | 0.02           | 0.01 | 0.36 | 0.02           | 0.01 | 0.64 | 0.01           | 0.01 | 0.76 | 0.01           | 0.01 | 1.00 | 0.02           | 0.01 | 0.46 |
| chr2                     | 171158996    | 28   | 0.11           | 0.01 | 0.00 | 0.01           | 0.00 | 0.36 | 0.03           | 0.00 | 0.55 | 0.02           | 0.00 | 0.30 | 0.02           | 0.00 | 0.47 | 0.00           | 0.00 | 1.00 |
| chrX                     | 119851942    | 26   | 0.11           | 0.01 | 0.01 | 0.00           | 0.03 | 1.00 | 0.00           | 0.01 | 1.00 | 0.00           | 0.03 | 1.00 | 0.01           | 0.03 | 1.00 | 0.01           | 0.03 | 1.00 |
| chr4                     | 3667514      | 50   | 0.11           | 0.01 | 0.00 | 0.01           | 0.00 | 0.36 | 0.02           | 0.00 | 0.55 | 0.00           | 0.02 | 1.00 | 0.00           | 0.02 | 1.00 | 0.00           | 0.01 | 1.00 |
| chr8                     | 129726442    | 104  | 0.09           | 0.01 | 0.00 | 0.01           | 0.01 | 0.64 | 0.01           | 0.00 | 0.62 | 0.01           | 0.01 | 0.76 | 0.02           | 0.00 | 0.47 | 0.00           | 0.02 | 1.00 |
| chr1                     | 241848280    | 31   | 0.09           | 0.02 | 0.05 | 0.02           | 0.01 | 0.36 | 0.01           | 0.02 | 1.00 | 0.02           | 0.02 | 0.53 | 0.01           | 0.01 | 0.96 | 0.01           | 0.02 | 1.00 |
| chr19                    | 19384988     | 25   | 0.08           | 0.01 | 0.01 | 0.01           | 0.00 | 0.36 | 0.00           | 0.00 | 1.00 | 0.01           | 0.00 | 0.37 | 0.01           | 0.00 | 0.47 | 0.00           | 0.00 | 0.44 |
| chr5                     | 169869406    | 32   | 0.08           | 0.00 | 0.02 | 0.01           | 0.04 | 1.00 | 0.01           | 0.11 | 1.00 | 0.04           | 0.00 | 0.25 | 0.01           | 0.08 | 1.00 | 0.02           | 0.07 | 1.00 |
| chr19                    | 35309590     | 273  | 0.08           | 0.01 | 0.01 | 0.03           | 0.01 | 0.36 | 0.05           | 0.02 | 0.61 | 0.04           | 0.01 | 0.18 | 0.02           | 0.02 | 1.00 | 0.07           | 0.01 | 0.01 |
| chr8                     | 28528022     | 77   | 0.08           | 0.00 | 0.01 | 0.00           | 0.00 | 1.00 | 0.01           | 0.00 | 0.80 | 0.01           | 0.00 | 0.37 | 0.01           | 0.00 | 0.65 | 0.00           | 0.00 | 0.94 |
| chr12                    | 107612674    | 56   | 0.06           | 0.00 | 0.00 | 0.01           | 0.00 | 0.51 | 0.01           | 0.00 | 0.80 | 0.01           | 0.00 | 0.57 | 0.00           | 0.00 | 1.00 | 0.01           | 0.00 | 0.20 |
| chr2                     | 3655228      | 45   | 0.06           | 0.00 | 0.05 | 0.00           | 0.03 | 1.00 | 0.01           | 0.02 | 1.00 | 0.02           | 0.02 | 0.76 | 0.00           | 0.04 | 1.00 | 0.00           | 0.02 | 1.00 |
| chr3                     | 57107802     | 40   | 0.05           | 0.00 | 0.01 | 0.01           | 0.01 | 0.64 | 0.02           | 0.01 | 0.55 | 0.00           | 0.01 | 1.00 | 0.00           | 0.01 | 1.00 | 0.01           | 0.01 | 1.00 |
| chr6                     | 35811616     | 39   | 0.05           | 0.00 | 0.03 | 0.05           | 0.04 | 0.64 | 0.02           | 0.04 | 1.00 | 0.02           | 0.03 | 1.00 | 0.03           | 0.05 | 1.00 | 0.01           | 0.06 | 1.00 |
| chr6                     | 136644276    | 25   | 0.05           | 0.00 | 0.02 | 0.00           | 0.02 | 1.00 | 0.00           | 0.03 | 1.00 | 0.00           | 0.01 | 1.00 | 0.01           | 0.01 | 1.00 | 0.00           | 0.02 | 1.00 |
| chr10                    | 45235318     | 67   | 0.11           | 0.04 | 0.08 |                |      |      |                |      |      |                |      |      |                |      |      |                |      |      |
| chr1                     | 28878370     | 104  | 0.10           | 0.05 | 0.16 |                |      |      |                |      |      |                |      |      |                |      |      |                |      |      |
| chr17                    | 28712496     | 39   | 0.08           | 0.08 | 0.63 |                |      |      |                |      |      |                |      |      |                |      |      |                |      |      |
| chr17                    | 362910       | 246  | 0.07           | 0.07 | 0.61 |                |      |      |                |      |      |                |      |      |                |      |      |                |      |      |
| chr11                    | 119024886    | 37   | 0.05           | 0.01 | 0.12 |                |      |      |                |      |      |                |      |      |                |      |      |                |      |      |
| chr15                    | 34179254     | 52   | 0.04           | 0.02 | 0.40 |                |      |      |                |      |      |                |      |      |                |      |      |                |      |      |
| chr10                    | 87861594     | 26   | 0.03           | 0.02 | 0.30 |                |      |      |                |      |      |                |      |      |                |      |      |                |      |      |
| chr17                    | 81941032     | 36   | 0.03           | 0.00 | 0.14 |                |      |      |                |      |      |                |      |      |                |      |      |                |      |      |

Supplementary Table 18 (continued below)

| ZFN Pair 1 capture - continued |              | Pair 1 continued |      |      |
|--------------------------------|--------------|------------------|------|------|
| hg38 coordinates               | integrations | %indels          |      | pval |
|                                |              | ZFN              | GFP  |      |
| chr20 46196718                 | 28           | 0.03             | 0.01 | 0.33 |
| chr7 151203002                 | 25           | 0.03             | 0.01 | 0.13 |
| chr2 240904936                 | 25           | 0.03             | 0.01 | 0.25 |
| chr3 197746150                 | 38           | 0.03             | 0.00 | 0.08 |
| chr4 186954080                 | 48           | 0.02             | 0.01 | 0.44 |
| chr3 72163900                  | 69           | 0.02             | 0.00 | 0.14 |
| chr7 158413556                 | 345          | 0.02             | 0.03 | 0.80 |
| chr22 18167878                 | 60           | 0.02             | 0.01 | 0.51 |
| chr7 101364162                 | 37           | 0.02             | 0.01 | 0.51 |
| chr11 77199762                 | 47           | 0.02             | 0.04 | 0.95 |
| chr3 195621368                 | 37           | 0.02             | 0.04 | 0.94 |
| chr1 110517930                 | 85           | 0.02             | 0.01 | 0.55 |
| chr8 139813412                 | 29           | 0.01             | 0.04 | 0.99 |
| chr6 32683930                  | 26           | 0.01             | 0.00 | 0.25 |
| chr1 234851754                 | 79           | 0.01             | 0.01 | 0.48 |
| chr22 21709082                 | 206          | 0.01             | 0.02 | 0.82 |
| chr9 35001138                  | 39           | 0.01             | 0.02 | 0.94 |
| chr6 31769912                  | 32           | 0.01             | 0.01 | 0.50 |
| chr22 19218188                 | 31           | 0.01             | 0.05 | 0.99 |
| chr21 42533054                 | 44           | 0.01             | 0.05 | 0.99 |
| chr1 247540474                 | 28           | 0.01             | 0.00 | 0.25 |
| chr8 104793608                 | 33           | 0.01             | 0.00 | 0.25 |
| chr20 57941386                 | 62           | 0.01             | 0.00 | 0.25 |
| chr15 78776288                 | 26           | 0.01             | 0.00 | 0.25 |
| chr12 53004488                 | 136          | 0.00             | 0.02 | 0.96 |
| chr19 48508592                 | 109          | 0.00             | 0.02 | 0.99 |
| chr8 66664620                  | 96           | 0.00             | 0.00 | 1.00 |
| chr1 203006352                 | 90           | 0.00             | 0.16 | 0.99 |
| chr22 20369586                 | 67           | 0.00             | 0.02 | 0.99 |
| chr8 42391528                  | 45           | 0.00             | 0.00 | 1.00 |
| chr4 79325484                  | 36           | 0.00             | 0.03 | 0.96 |
| chr1 244063132                 | 32           | 0.00             | 0.05 | 0.99 |
| chr12 56632406                 | 93           | ND               | ND   | ND   |
| chr1 25146536                  | 56           | ND               | ND   | ND   |
| chr16 2155772                  | 54           | ND               | ND   | ND   |
| chr1 2480064                   | 38           | ND               | ND   | ND   |
| chr1 14131644                  | 32           | ND               | ND   | ND   |
| chr17 40100232                 | 32           | ND               | ND   | ND   |
| chr3 195749386                 | 31           | ND               | ND   | ND   |
| chr16 81696616                 | 28           | ND               | ND   | ND   |
| chr3 56682902                  | 28           | ND               | ND   | ND   |
| chr17 44520096                 | 26           | ND               | ND   | ND   |
| chr5 164600842                 | 25           | ND               | ND   | ND   |

**Supplementary Table 18.** “Pair 1” column: Indel levels measured at the top 93 ranked candidate off-target loci for the parent TCR $\alpha$  ZFN dimer as assessed in genomic DNA from T-cells treated with the parent ZFNs or a GFP control. ND indicates that no data were obtained due to a failed PCR or sequencing analysis failure. Loci are sorted by %indels observed. Remaining columns: Indel levels measured at the 41 loci that yielded significant modification by the parent ZFNs, assessed in genomic DNA from T-cells treated with the indicated variant ZFN pairs or a GFP control. Integrations are the total unique integrations from four biological replicates and indel values represent an individual measurement. ND indicates that no data were obtained due to a failed PCR or sequencing analysis failure. %indels at the intended target are highlighted in green and %indels at all other loci are highlighted with a red heat map. P-values for each ZFN-GFP comparison are shown to the right of each pair of indel values. See **Supplementary Note 2** for details of the statistical test. Statistically significant p-values are highlighted in blue

## Supplementary Table 19

### ZFN construct information

Complete DNA and amino acid information is given for the coding sequence of each of the parent ZFN constructs. Recognition helices within each zinc finger are underlined.

Original AAVS1 ZFN pair

> 30035 (Left AAVS1 ZFN)

ATGGACTACAAAGACCATGACGGTGATTATAAAGATCATGACATCGATTACAAGGATGACGATGACAAGATGGCCCCAAGAAGAAGAGGAAGGTCGGCA  
TCCACGGGGTACCCGCCGCTATGGCTGAGAGGCCCTTCCAGTGTGCAATCTGCATGCGTAACCTCAGTCGCTCCGACCACCTGTCCCGCCACATCCGCAC  
CCACACCGGGCAGAAGCCCTTTGCCTGTGACATTTGTGGGAGGAAATTTGCCACCTCCGGCCACCTGTCCCGCCATACCAAGATACACACGGGCAGCCAA  
AAGCCCTTCCAGTGTGCAATCTGCATGCGTAACTTCACTTACAACCTGGCACCTGCAGCGCCACATCCGCACCCACACCGGGCAGAAGCCTTTGCCTGTG  
ACATTTGTGGGAGGAAATTTGCCCGCTCCGACCACCTGACCACCCATACCAAGATACACACGGGATCTCAGAAGCCCTTCCAGTGTGCAATCTGCATGCG  
TAACCTCAGTCAACTACGCCCCGACTGTACATCCGCACCCACACCGGCAGAAAGCCTTTGCCTGTGACATTTGTGGGAGGAAATTTGCCCAGAAC  
TCCACCCGCATCGGCCATACCAAGATACACCTCGCGGGATCCAGCTGGTGAAGAGCGAGCTGGAGGAGAAGAAGTCCGAGCTGCGGCACAAGCTGAAGT  
ACGTGCCCCACGAGTACATCGAGCTGATCGAGATCGCCAGGAACAGCACCAGGACCCATCTGGAGATGAAGGTGATGGAGTCTTCATGAAGGTGTA  
CGGTACAGGGAAAGCCTGGCGGAAGCAGAAAGCCTGACGGCCCATCTATACAGTGGGCAGCCCATCGATTACGGCGTGATCGTGGACACAAG  
GCCTACAGCGGGCTACAATCTGCCTATCGGCCAGGCCGACGAGATGGAGAGATACGTGGAGGAGAACCAGACCCGGGATAAGCACCTCAACCCCAACG  
AGTGGTGAAGGTGTACCCTAGCAGCGTGACCGAGTTCAAGTTCCTGTTCTGAGCGGCCACTTCAAGGGCAACTACAAGGCCAGCTGACCGAGCTGAA  
CCACATCACCAACTGCAATGGCGCCGTGCTGAGCGTGGAGGAGCTGCTGATCGCGGGCGAGATGATCAAAGCCGGCACCTGACACTGGAGGAGGTGGG  
CGCAAGTTCACAACCGCGAGATCAACTTCAGATCTTGATAA

MDYKDHDGDYKDHDIDYKDDDDKMAPKKRKGIVHGVPAAMAERPFQCRICMRNFSRSDHLSRHIRHTHTGEKPFACDICGRKFATSGHLSRHTKIHTGSQ  
KPFQCRICMRNFSYNWHLQRHIRHTHTGEKPFACDICGRKFARSDHLLTHTKIHTGSQKPFQCRICMRNFSHNYARDCHIRHTHTGEKPFACDICGRKFAQN  
STRIGHTKIHLRGSQVLKSELEEKSELRHKLKYPHEYIELIEIARNSTQDRILEMKVMEFFMKVYGYRGKHLGGSRKPDGAIYTVGSPIDYGVIVDTK  
AYSGGYNLPIGQADEMERYVEENQTRDKHLNPNNEWKVPSSVTEFKFLFVSGHFKNYKAQLTRLNHI TNCGAVLSVEELLIIGGEMIKAGTLTLEVR  
RKFNNGEINFRS\*\*

> 30054 (right AAVS1 ZFN)

ATGGACTACAAAGACCATGACGGTGATTATAAAGATCATGACATCGATTACAAGGATGACGATGACAAGATGGCCCCAAGAAGAAGAGGAAGGTCGGCA  
TTCATGGGGTACCCGCCGCTATGGCTGAGAGGCCCTTCCAGTGTGCAATCTGCATGCGTAACCTCAGTGACCGCTCCAACCTGTCCCGCCACATCCGCAC  
CCACACCGGCAGAAGCCCTTTGCCTGTGACATTTGTGGGAGGAAATTTGCCCTGAAGCAGCACCTGACCCGCCATACCAAGATACACACGCATCCCAGG  
GCACCTATTCCTCAAGCCCTTCCAGTGTGCAATCTGCATGCGTAACCTCAGTACCTCCGGCAACCTGACCCGCCACATCCGCACCCACACCGGCAGAAAGC  
CTTTGCCTGTGACATTTGTGGGAGGAAATTTGCCCGCCGACTGGCGCCGACCATACCAAGATACACACGGGATCTCAGAAGCCCTTCCAGTGTGCG  
AATCTGCATGCGTAACTCAGTCACTCCACCTGACCCGCCACATCCGCACCCACACCGGCAGAAAGCCTTTGCCTGTGACATTTGTGGGAGGAAA  
TTTGCCTGCTGGCAACCGCACCGCCCATACCAAGATACACCTGCGGGGATCCAGCTGGTGAAGAGCGAGCTGGAGGAGAAGAAGTCCGAGCTGCGGC  
ACAAGCTGAAGTACGTGCCCCAGGATACATCGAGCTGATCGAGATCGCCAGGAACAGCACCCAGCCGATCTCCGGAGATGAAGGTGATGGAGTCTT  
CATGAAGGTGTACGGCTACAGGGGAAAGCACCTGGCGCGAAGCAGAAAGCTGACCGGCCATCTATACAGTGGCGAGCCCATCGATTACCGCTGATC  
GTGGACACAAGGCCCTACAGCGCGGCTACAATCTGCCTATCGGCCAGGCCGACGAGATGCAGAGATACGTGAAGGAGAACCAGACCCGGAATAAGCACA  
TCACCCCAACGAGTGGTGAAGGTGTACCCTAGCAGCGTGACCGAGTTCAAGTTCCTGTTCTGAGCGGCCACTTCAAGGGCAACTACAAGGCCAGCT  
GACCAGGTGAACCGCAAACCAACTGCAATGGCGCCGTGCTGAGCGTGGAGGAGCTGCTGATCGCGGGCGAGATGATCAAAGCCGGCACCTGACACTG  
GAGGAGGTGCGGCGCAAGTTCACAACCGCGAGATCAACTTCTGATAA

MDYKDHDGDYKDHDIDYKDDDDKMAPKKRKGIVHGVPAAMAERPFQCRICMRNFSRSDHLSRHIRHTHTGEKPFACDICGRKFALKQHLRHTKIHTHPR  
APIPKPFQCRICMRNFSYSGNLTRHIRHTHTGEKPFACDICGRKFARRDWRDHTKIHTGSQKPFQCRICMRNFSQSSHLTRHIRHTHTGEKPFACDICGRK  
FARLDNRHTAHTKIHLRGSQVLKSELEEKSELRHKLKYPHEYIELIEIARNSTQDRILEMKVMEFFMKVYGYRGKHLGGSRKPDGAIYTVGSPIDYGV  
VDTKAYSGGYNLPIGQADEMQRVYKVENQTRNKHINPNNEWKVPSSVTEFKFLFVSGHFKNYKAQLTRLNRKTNCGAVLSVEELLIIGGEMIKAGTLT  
EEVRRKFNNGEINFRS\*\*

### Original PD1 ZFN pair

> 12942 (Left PD1 ZFN)

ATGGACTACAAAGACCATGACGGTGATTATAAAGATCATGACATCGATTACAAGGATGACGATGACAAGATGGCCCCAAGAAGAAGAGGAAGGTCGGCA  
TTCACGGGGTACCCGCCGCTATGGCTGAGAGGCCCTTCCAGTGTGCAATCTGCATGCGTAAGTTTGCCTGAGTCCGGCCACCTGTCCCGCCATACCAAGAT  
ACACACGGGGCAGAAGCCCTTCCAGTGTGCAATCTGCATGCGTAACTTCACTTACAACCTGGCACCTGCAGCGCCACATCCGCACCCACACAGGCGAGAAG  
CCTTTGCCTGTGACATTTGTGGGAGGAAATTTGCCCAACACGACAGCCGCAAAAACCATACCAAGATACACACGGGATCTCAGAAGCCCTTCCAGTGTG  
GAATCTGCATGCGTAACTTCACTCAGTCCGACGACCTGACCCGCCACATCCGCACCCACACAGGCGAGAAGCCTTTTGCCTGTGACATTTGTGGGAGGAA  
GTTTGCCTGCTCCGACACCTGACCCAGCATAACCAAGATACACCTGCGGGGATCCAGCTGGTGAAGAGCGAGCTGGAGGAGAAGAAGTCCGAGCTGCGG  
CACAAGCTGAAGTACGTGCCCCACGATACATCGAGCTGATCGAGATCGCCAGGAACAGCACCCAGGACCCATCTCGAGATGAAGGTGATGGAGTCT  
TCATGAAGGTGTACGGCTACAGGGGAAAGCACCTGGCGGAAGCAGAAAGCCTGACCGGCCATCTATACAGTGGGCAGCCCATCGATTACGGCGTGAT  
CGTGGACACAAGGCCCTACAGCGCGGCTACAATCTGCCTATCGGCCAGGCCGACGAGATGCAGAGATACGTGGAGGAGAACCAGACCCGGAATAAGCAC  
ATCAACCCCAACGAGTGGTGAAGGTGTACCCTAGCAGCGTGACCGAGTTCAAGTTCCTGTTCTGAGCGGCCACTTCAAGGGCAACTACAAGGCCAGC

TGACCAGGCTGAACCACATCACCAACTGCAATGGCGCCGTGCTGAGCGTGGAGGAGCTGCTGATCGGGCGGAGATGATCAAAGCCGGCACCCCTGACACT  
GGAGGAGGTGCGGCGCAAGTTCAACAACGGCGAGATCAACTTCAGATCTTGATAA

MDYKDHDGDYKDHDIDYKDDDDKMAPKKRKRKVGIVHVPAAAMAERPFQCRICMRKFAQSGHLSRHTKIHTGEKPFQCRICMRNFRSRLSVHIRTHTGEK  
PFACDICGRKFAHNSDRKNHTKIHTGSQKPFQCRICMRNFRSDDLTRHIRTHTGEKPFACDICGRKFA~~RS~~DHLTQHHTKIHLRGSQLVKSELEEKSELR  
HKLKYVPHEYIELIEIARNSTQDRILEMKVMEFFMKVYGYRGKHLGGRKPDGAIYTVGSPIDYGVIVDTKAYSGGYNLPIGQADEMQRVVEENQTRNKH  
INPNEWKVVYSSVTEFKFLFVSGHFKNYKAQLTRLNHI TN CN GAVLSVEELLIGGEMIKAGTLTLEEVRRKFNNGEINFRS\*\*

> 25029 (Right PD1 ZFN)

ATGGACTACAAAGACCATGACGGTGATTATAAAGATCATGACATCGATTACAAGGATGACGATGACAAGATGGCCCCAAGAAGAAGAGGAAGGTGGGCA  
TTCACGGGGTACCCGCCGCTATGGCTGAGAGGCCCTTCCAGTGTGCAATCTGCATGTGTAAGTTTGCCCGCAACGCCGCCCTGACCCGCCATACCAAGAT  
ACACACGGGGGAGAAGCCGTTCCAGTGTGCGATCTGCATGCGTAACTTCAGTCGCTCCGACGAGCTGACCCGCCACATCCGCACCCACACAGGCGAGAAG  
CCTTTTGTGCTTGCACATTTGTGGGAGGAAGTTTGCCCGGCACCACCCTGGCCGCCATACCAAGATACACACGGGATCTCAGAAGCCCTTCCAGTGTG  
GAATCTGCATGCGTAACTTCAGTACCCGCCCGGTGCTGAAGCGCCACATCCGCACCCACACAGGCGAGAAGCCTTTTGCTTGCACATTTGTGGGAGGAA  
GTTTGGCAGCCGCTCCGCCCTGGCCGCCATACCAAGATACACCTGCGGGGATCCCAGCTGGTGAAGAGCGAGCTGGAGGAGAAGAAGTCCGAGCTGCGG  
CACAAGCTGAAGTACGTGCCCCACGAGTACATCGAGCTGATCGAGATCGCCAGGAACAGCACCCAGGACCCGATCCTGGAGATGAAGGTGATGGAGTCT  
TCATGAAGGTGTACGGCTACAGGGGAAAGCACCTGGGCGGAAGCAGAAAGCCTGACGGCGCCATCTATACAGTGGGCAGCCCCATCGATTACGGCGTGAT  
CGTGGACACAAAGCCCTACAGCGCGGCTACAATCTGCCTATCGGCCAGGCCGACGAGATGCAGAGATACGTGGAGGAGAACCAGACCCGGAATAAGCAC  
ATCAACCCCAACGAGTGGTGAAGGTGTACCCTAGCAGCGTGACCGAGTTCAGTTCCTGTTCTGTCGTGAGCGGCCACTTCAAGGGCAACTACAAGGCCAGC  
TGACCAGGCTGAACCACATCACCAACTGCAATGGCGCCGTGCTGAGCGTGGAGGAGCTGCTGATCGGGCGGAGATGATCAAAGCCGGCACCCCTGACACT  
GGAGGAGGTGCGGCGCAAGTTCAACAACGGCGAGATCAACTTCAGATCTTGATAA

MDYKDHDGDYKDHDIDYKDDDDKMAPKKRKRKVGIVHVPAAAMAERPFQCRICMRKFA~~RS~~DLTRHIRTHTGEKPFQCRICMRNFRS~~DL~~TRHIRTHTGEK  
PFACDICGRKFA~~RH~~HLAAHTKIHTGSQKPFQCRICMRNFRSTRPVLKRHIRTHTGEKPFACDICGRKFA~~DR~~SALARHTKIHLRGSQLVKSELEEKSELR  
HKLKYVPHEYIELIEIARNSTQDRILEMKVMEFFMKVYGYRGKHLGGRKPDGAIYTVGSPIDYGVIVDTKAYSGGYNLPIGQADEMQRVVEENQTRNKH  
INPNEWKVVYSSVTEFKFLFVSGHFKNYKAQLTRLNHI TN CN GAVLSVEELLIGGEMIKAGTLTLEEVRRKFNNGEINFRS\*\*

### Original BCL11A ZFN pair

> 51857 (Left BCL11a ZFN)

ATGGACTACAAAGACCATGACGGTGATTATAAAGATCATGACATCGATTACAAGGATGACGATGACAAGATGGCCCCAAGAAGAAGAGGAAGGTGCGCA  
TTCACGGGGTACCCGCCGCTATGGCTGAGAGGCCCTTCCAGTGTGCAATCTGCATGCGTAACTTCAGTGACCAGTCCAACCTGCGCGCCACATCCGCAC  
CCACACCGGGGAGAAGCCCTTTGCTGTGACATTTGTGGGAGGAAATTTGCCCGCAACTTCTCCCTGACCATGCATACCAAGATACACACGGGCGAGCCAA  
AAGCCCTTCCAGTGTGCAATCTGCATGCGTAACTTCAGTTCACCGGCAACCTGACCAACCACATCCGCACCCACACCGGCGAGAAGCCTTTTGCCTGTG  
ACATTTGTGGGAGGAAATTTGCCACCTCCGGCTCCCTGACCCGCCATACCAAGATACACACGACCCCGCGCGCCCGATCCCGAAGCCCTTCCAGTGTG  
AATCTGCATGCGTAACTTCAGTGACCAGTCCAACCTGCGCGCCACATCCGCACCCACACCGGCGAGAAGCCTTTTGCTGTGACATTTGTGGGAGGAAA  
TTTGGCCCGCAGTGTGCTGTCCACCATACCAAGATACACCTGCGGGGATCCATCAGCAGAGCCAGACCACTGAACCCGACCCGGAGCTGGAGGAGA  
AGAAGTCCGAGCTGCGGCACAAGCTGAAGTACGTGCCACGAGTACATCGAGCTGATCGAGATCGCCAGGAACAGCACCCAGGACCCGATCCTGGAGAT  
GAAGGTGATGGAGTCTTCATGAAGGTGACGGCTACAGGGGAAAGCACCTGGGCGGAAGCAGAAAGCCTGACGGCGCCATCTATACAGTGGGCGAGCCCC  
ATCGATTACGGCGTGATCGTGGACACAAAGCCCTACAGCGCGGCTACAATCTGCCTATCGGCCAGGCCGACGAGATGGAGAGATACGTGGAGGAGAACC  
AGACCCGGGATAAGCACCTCAACCCCAACGAGTGGTGAAGGTGTACCCTAGCAGCGTGACCGAGTTCAGTTCCTGTTCTGTCGTGAGCGGCCACTTCAAGGG  
CAACTACAAGGCCAGCTGACCGAGGTGAACCATACCAACTGCAATGGCCGACTGCTGAGCGTGGAGGAGCTGCTGATCGGGCGGAGATGATCAA  
GCCGCGACCCCTGACACTGGAGGAGGTGCGGCGCAAGTTCAACAACGGCGAGATCAACTTCAGATCTTGATAA

MDYKDHDGDYKDHDIDYKDDDDKMAPKKRKRKVGIVHVPAAAMAERPFQCRICMRNFRSDQSNLRAHIRTHTGEKPFACDICGRKFA~~RN~~FS~~SL~~TMHTKIHTGSQ  
KPFQCRICMRNFRS~~ST~~GNLNTNHIRTHTGEKPFACDICGRKFA~~T~~SGSLTRHTKIHTHPRAP~~I~~KPFQCRICMRNFRSDQSNLRAHIRTHTGEKPFACDICGRK  
FAAQ~~C~~CLFHHTKIHLRGSISRARPLNHPHELEEKSELRLKLYVPHEYIELIEIARNSTQDRILEMKVMEFFMKVYGYRGKHLGGRKPDGAIYTVGSP  
IDYGVIVDTKAYSGGYNLPIGQADEMERYVEENQTRDKHLNPNNEWKVVYSSVTEFKFLFVSGHFKNYKAQLTRLNHI TN CN GAVLSVEELLIGGEMIK  
AGTLTLEEVRRKFNNGEINFRS\*\*

> 51949 (Right BCL11a ZFN)

ATGGACTACAAAGACCATGACGGTGATTATAAAGATCATGACATCGATTACAAGGATGACGATGACAAGATGGCCCCAAGAAGAAGAGGAAGGTGCGCA  
TTCATGGGGTACCCGCCGCTATGGCTGAGAGGCCCTTCCAGTGTGCAATCTGCATGCGTAACTTTGCCCGCAACGACCACCCACCCATACCAAGAT  
ACACACGGGCGAGAAGCCCTTCCAGTGTGCAATCTGCATGCGTAACTTCAGTTCAGAGAGGCCCCACCTGATCCGCCACATCCGCACCCACACCGGCGAGAAG  
CCTTTTGCCTGTGACATTTGTGGGAGGAAATTTGCCAGAGGGCACCTGGCGGAGCATAACCAAGATACACACGGGATCTCAGAAGCCCTTCCAGTGTG  
GAATCTGCATGCGTAACTTCAGTTCGCGGCCGACCTGTCGCCACATCCGCACCCACACCGGCGAGAAGCCTTTTGCTGTGACATTTGTGGGAGGAA  
ATTTGCCCGCGGACAACTGCACTCCATACCAAGATACACCTGCGGGGATCCAGCTGGTGAAGAGCGAGCTGGAGGAGAAGAAGTCCGAGCTGCGG  
CACAAGCTGAAGTACGTGCCACGAGTACATCGAGCTGATCGAGATCGCCAGGAACAGCACCCAGGACCCGATCCTGGAGATGAAGGTGATGGAGTCT  
TCATGAAGGTGTACGGCTACAGGGGAAAGCACCTGGGCGGAAGCAGAAAGCCTGACGGCGCCATCTATACAGTGGGCAGCCCCATCGATTACGGCGTGAT  
CGTGGACACAAAGCCCTACAGCGCGGCTACAATCTGCCTATCGGCCAGGCCGACGAGATGCAGAGATACGTGAAGGAGAACCAGACCCGGAATAAGCAC  
ATCAACCCCAACGAGTGGTGAAGGTGTACCCTAGCAGCGTGACCGAGTTCAGTTCCTGTTCTGTCGTGAGCGGCCACTTCAAGGGCAACTACAAGGCCAGC  
TGACCAGGCTGAACCGAAAACCAACTGCAATGGCGCCGTGCTGAGCGTGGAGGAGCTGCTGATCGGGCGGAGATGATCAAAGCCGGCACCCCTGACACT  
GGAGGAGGTGCGGCGCAAGTTCAACAACGGCGAGATCAACTTCAGATCTTGATAA

MDYKDHDGDYKDHDIDYKDDDDKMAPKKRKRKVGIVHVPAAAMAERPFQCRICMRKFA~~RN~~DHRTHTKIHTGEKPFQCRICMRNFRSQKALH~~IR~~HIRTHTGEK  
PFACDICGRKFAQ~~K~~GTGLGEHTKIHTGSQKPFQCRICMRNFRSRGR~~DL~~SRHIRTHTGEKPFACDICGRKFA~~R~~RDNLH~~SH~~TKIHLRGSQLVKSELEEKSELR

HKLKYVPHEYIELIEIARNSTQDRILEMKVMEFFMKVYGYRGKHLGGSRKPDGAIYTVGSPIDYGVIVDTKAYSGGYNLP IQADEMQRVYKENVQTRNKH  
INPNEWKVVYSSVTEFKFLFVSGHFKGNKYKAQLTRLNRKTNCGAVLSVEELLIGGEMIKAGTLTLEEVRKFNNGEINF\*\*

## Original TRAC ZFNs

> 55248 (Left TRAC ZFN)

ATGGACTACAAAGACCATGACGGTGATTATAAAGATCATGACATCGATTACAAGGATGACGATGACAAGATGGCCCCAAGAAGAAGAGGAAGGTTCGGCA  
TTCATGGGGTACCCGCCCTATGGCTGAGAGGCCCTTCCAGTGTGCAATCTGCATGCGTAACCTCAGTGACCAGTCCAACTCGCGGCCACATCCGCAC  
CCACACCGGGGAGAAGCCTTTTGCCTGTGACATTTGTGGGAGGAAATTTGCCACCTCTCCAACCGCAAGACCATAACCAAGATACACACGGGCAGCCAA  
AAGCCCTTCCAGTGTGCAATCTGCATGCGTAACCTCAGTCTGCAGCAGACCCCTGGCCGACCACATCCGCACCCACACCGCGGAGAAGCCTTTTGCCTGTG  
ACATTTGTGGGAGGAAATTTGCCAGTCCGGCAACCTGGCCGCCATACCAAGATACACACGGGATCTCAGAAGCCCTTCCAGTGTGCAATCTGCATGCG  
TAACCTCAGTCCGGCAGGACCTGATCACCCACATCCGCACCCACACCGGGGAGAAGCCTTTTGCCTGTGACATTTGTGGGAGGAAATTTGCCACCTCC  
TCCAACCTGTCCCGCATACCAAGATACACCTGCGGGGATCCAGCTGGTGAAGAGCGAGCTGGAGGAGAAGAAGTCCGAGTCCGGCACAAGCTGAAGT  
ACGTGCCCCACGAGTACATCGAGCTGATCGAGATCGCCAGGAACAGCACCAGGACCCGATCTGGAGATGAAGGTGATGGAGTTCTTCATGAAGGTGTA  
CGGCTACAGGGGAAAGCACCTGGGCGGAAGCAGAAAGCCTGACGGCGCCATCTATACAGTGGGCGACCCCATCGATTACGGCGTGATCGTGGACACAAAG  
GCCTACAGCGGGCTACAATCTGCCTATCGGCCAGGCCGACGAGATCGAGAGATACGTGAAGGAGAACAGACCCGGAATAAGCACATCAACCCCAACG  
AGTGGTGAAGGTGTACCCTAGCAGCGTGACCGAGTTCAAGTCTCTGTTCGTGAGCGGCCACTTCAAGGGCACTACAAGGCCAGCTGACCGAGGTGAA  
CCGCAAAACCAACTGCAATGCGGCCCTGCTGACGCTGAGGAGCTGCTGATCGCGCGGAGATGATCAAAGCCGCGACCCCTGACACTGGAGGAGGTGCGG  
CGCAAGTCAACAACGGCGAGATCAACTTCTGATA

MDYKDHGDYKDHDIDYKDDDDKMAPKKRKGVIHGVPAAEAERPFQCRICMRNFSDSQSNLRAHIRHTHTGKPFACDICGRKFATSSNRKTHTKIHTGSQ  
KPFQCRICMRNFSLQTLADHIRHTHTGKPFACDICGRKFAQSGNLARHTKIHTGSQKPFQCRICMRNFSSRREDLITHIRHTHTGKPFACDICGRKFAT  
SNLSRHTKIHLRGSQLVKSELEKSELRHKLKYVPHEYIELIEIARNSTQDRILEMKVMEFFMKVYGYRGKHLGGSRKPDGAIYTVGSPIDYGVIVDTK  
AYSAGGYNLP IQADEMQRVYKENVQTRNKHINPNEWKVVYSSVTEFKFLFVSGHFKGNKYKAQLTRLNRKTNCGAVLSVEELLIGGEMIKAGTLTLEEVR  
RKFNNGEINF\*\*

> 55254 (Right TRAC ZFN)

ATGGACTACAAAGACCATGACGGTGATTATAAAGATCATGACATCGATTACAAGGATGACGATGACAAGATGGCCCCAAGAAGAAGAGGAAGGTTCGGCA  
TCCACGGGGTACCCGCCCTATGGCTGAGAGGCCCTTCCAGTGTGCAATCTGCATGCGTAACCTCAGTCCGCTCCGACCCTGTCCACCCACATCCGCAC  
CCACACCGGGGAGAAGCCTTTTGCCTGTGACATTTGTGGGAGGAAATTTGCCGACCGTCCCACTGGCCCGCATACCAAGATACACACGGGCAGCCAA  
AAGCCCTTCCAGTGTGCAATCTGCATGCGTAAGTTTGCCTGAAGCAGCACCTGAACGAGCATAACCAAGATACACACGGGCGAGAAGCCTTCCAGTGTG  
GAATCTGCATCGTAACTCAGTCACTCCGCAACCTGGCCGCCACATCCGCACCCACACCGGGGAGAAGCCTTTTGCCTGTGACATTTGTGGGAGGAA  
ATTTGCCACAACTCCCTCCCTGAAGGACATACCAAGATACACCTGCGGGGATCCAGCTGGTGAAGGAGAGAGTCCGAGTCCGGCACAAGCTGAAGT  
CACAAGCTGAAGTACGTGCCACGAGTACATCGAGCTGATCGAGATCGCCAGGAACAGCACCAGGACCCGATCTGGAGATGAAGGTGATGGAGTTCT  
TCATGAAGGTGTACGGCTACAGGGGAAAGCACCTGGGCGGAAGCAGAAAGCCTGACGGCGCCATCTATACAGTGGGCGACCCCATCGATTACGGCGTGAT  
CGTGGACACAAAGGCCTACAGCGGGCGGTACAATCTGCCTATCGGCCAGGCCGACGAGATGGAGAGATACGTGGAGGAGAACCAGACCCGGGATAAGCAC  
CTCAACCCCAACGAGTGGTGAAGGTGTACCCTAGCAGCGTGACCGAGTTCAAGTCTCTGTTCGTGAGCGGCCACTTCAAGGGCACTACAAGGCCAGC  
TGACCGAGCTGAACCAATCACCAACTGCAATGGCGCGTGTGAGCGTGGAGGAGCTGCTGATCGCGCGGAGATGATCAAAGCCGCGACCCCTGACACT  
GGAGGAGGTGCGGCGAAGTTCAACAACGGCGAGATCAACTTCAAGTCTTGATA

MDYKDHGDYKDHDIDYKDDDDKMAPKKRKGVIHGVPAAEAERPFQCRICMRNFSSRDHLSTHIRHTHTGKPFACDICGRKFADRSHLARHTKIHTGSQ  
KPFQCRICMRKFALKQHLNEHTKIHTGKPFQCRICMRNFSQSGNLARHIRHTHTGKPFACDICGRKFAHNSLKDHTKIHLRGSQLVKSELEKSELR  
HKLKYVPHEYIELIEIARNSTQDRILEMKVMEFFMKVYGYRGKHLGGSRKPDGAIYTVGSPIDYGVIVDTKAYSAGGYNLP IQADEMERYVEENQTRDKH  
LNPNEWKVVYSSVTEFKFLFVSGHFKGNKYKAQLTRLNHTNCGAVLSVEELLIGGEMIKAGTLTLEEVRKFNNGEINFRS\*\*

## BCL11A ZFP Backbone variants

To create the BCL11A ZFP backbone variants, the original BCL11A ZFNs were cloned into a vector containing the woodchuck hepatitis virus posttranslational regulatory element (WPRE). Arginine to glutamine mutations were created by changing the desired codon to CAG. The resulting mutations in the protein sequences below are highlighted in red. The mutations are denoted by a string of characters that indicate the total number of glutamine (Q) mutations as well as which zinc fingers contain these mutations. A total of two mutations in fingers 1 and 3 would be denoted as “Q2-F13”.

> 63007 Left ZFN

MDYKDHGDYKDHDIDYKDDDDKMAPKKRKGVIHGVPAAEAERPFQCRICMRNFSDSQSNLRAHIRHTHTGKPFACDICGRKFARNFSSLTMHTKIHTGSQKPFQCRICMRNF  
SSTGNLTNHIRHTHTGKPFACDICGRKFATSGSLTRHTKIHTHPRAP I PKPFQCRICMRNFSDSQSNLRAHIRHTHTGKPFACDICGRKFAQCCFLFHHTKIHLRGSSISRAR  
PLNPHPELEEKSELRHKLKYVPHEYIELIEIARNSTQDRILEMKVMEFFMKVYGYRGKHLGGSRKPDGAIYTVGSPIDYGVIVDTKAYSAGGYNLP IQADEMERYVEENQT  
RDKHLNPNNEWKVVYSSVTEFKFLFVSGHFKGNKYKAQLTRLNHTNCGAVLSVEELLIGGEMIKAGTLTLEEVRKFNNGEINFRS\*\*

> 63008 Left ZFN Q1-F1

MDYKDHGDYKDHDIDYKDDDDKMAPKKRKGVIHGVPAAEAERPFQCRICMRNFSQSNLRAHIRHTHTGKPFACDICGRKFARNFSSLTMHTKIHTGSQKPFQCRICMRNF  
SSTGNLTNHIRHTHTGKPFACDICGRKFATSGSLTRHTKIHTHPRAP I PKPFQCRICMRNFSDSQSNLRAHIRHTHTGKPFACDICGRKFAQCCFLFHHTKIHLRGSSISRAR  
PLNPHPELEEKSELRHKLKYVPHEYIELIEIARNSTQDRILEMKVMEFFMKVYGYRGKHLGGSRKPDGAIYTVGSPIDYGVIVDTKAYSAGGYNLP IQADEMERYVEENQT  
RDKHLNPNNEWKVVYSSVTEFKFLFVSGHFKGNKYKAQLTRLNHTNCGAVLSVEELLIGGEMIKAGTLTLEEVRKFNNGEINFRS\*\*

> 63009 Left ZFN Q1-F3

MDYKDHGDYKDHDIDYKDDDDKMAPKKRKGVIHGVPAAEAERPFQCRICMRNFSDSQSNLRAHIRHTHTGKPFACDICGRKFARNFSSLTMHTKIHTGSQKPFQCRICMRNF  
SSTGNLTNHIRHTHTGKPFACDICGRKFATSGSLTRHTKIHTHPRAP I PKPFQCRICMRNFSDSQSNLRAHIRHTHTGKPFACDICGRKFAQCCFLFHHTKIHLRGSSISRAR







I L E M K V M E F F M K V Y G Y R G K H L G G S R K P D G A I Y T V G S P I D Y G V I V D T K A Y S G G Y N L P I G Q A D E M Q R Y V K E N Q T R N K H I N P N E W W K V Y P S S V T E F K F L F V S G H F K G N Y K A Q L T R  
L N R K T N C N G A V L S V E E L L I G G E M I K A G T L T L E E V R R K F N N G E I N F \*\*

> 63020 Right ZFN Q2-F14

M D Y K D H D G D Y K D H D I D Y K D D D D K M A P K K R K V G I H G V P A A M A E R P F Q C R I C M Q K F A R N D H R T T H T K I H T G E K P F Q C R I C M R N F S Q K A H L I R H I R T H T G E K P F A C D I C G R K F A  
Q K G T L G E H T K I H T G S Q K P F Q C R I C M Q N F S R G R D L S R H I R T H T G E K P F A C D I C G R K F A R R D N L S H S T K I H L R G S Q L V K S E L E E K K S E L R H K L K Y V P H E Y I E L I E I A R N S T Q D R  
I L E M K V M E F F M K V Y G Y R G K H L G G S R K P D G A I Y T V G S P I D Y G V I V D T K A Y S G G Y N L P I G Q A D E M Q R Y V K E N Q T R N K H I N P N E W W K V Y P S S V T E F K F L F V S G H F K G N Y K A Q L T R  
L N R K T N C N G A V L S V E E L L I G G E M I K A G T L T L E E V R R K F N N G E I N F \*\*

> 63021 Right ZFN Q2-F24

M D Y K D H D G D Y K D H D I D Y K D D D D K M A P K K R K V G I H G V P A A M A E R P F Q C R I C M R K F A R N D H R T T H T K I H T G E K P F Q C R I C M Q N F S Q K A H L I R H I R T H T G E K P F A C D I C G R K F A  
Q K G T L G E H T K I H T G S Q K P F Q C R I C M Q N F S R G R D L S R H I R T H T G E K P F A C D I C G R K F A R R D N L S H S T K I H L R G S Q L V K S E L E E K K S E L R H K L K Y V P H E Y I E L I E I A R N S T Q D R  
I L E M K V M E F F M K V Y G Y R G K H L G G S R K P D G A I Y T V G S P I D Y G V I V D T K A Y S G G Y N L P I G Q A D E M Q R Y V K E N Q T R N K H I N P N E W W K V Y P S S V T E F K F L F V S G H F K G N Y K A Q L T R  
L N R K T N C N G A V L S V E E L L I G G E M I K A G T L T L E E V R R K F N N G E I N F \*\*

> 65767 Right ZFN Q2-F35

M D Y K D H D G D Y K D H D I D Y K D D D D K M A P K K R K V G I H G V P A A M A E R P F Q C R I C M R K F A R N D H R T T H T K I H T G E K P F Q C R I C M R N F S Q K A H L I R H I R T H T G E K P F A C D I C G Q K F A  
Q K G T L G E H T K I H T G S Q K P F Q C R I C M R N F S R G R D L S R H I R T H T G E K P F A C D I C G Q K F A R R D N L S H S T K I H L R G S Q L V K S E L E E K K S E L R H K L K Y V P H E Y I E L I E I A R N S T Q D R  
I L E M K V M E F F M K V Y G Y R G K H L G G S R K P D G A I Y T V G S P I D Y G V I V D T K A Y S G G Y N L P I G Q A D E M Q R Y V K E N Q T R N K H I N P N E W W K V Y P S S V T E F K F L F V S G H F K G N Y K A Q L T R  
L N R K T N C N G A V L S V E E L L I G G E M I K A G T L T L E E V R R K F N N G E I N F \*\*

> 63022 Right ZFN Q3-124

M D Y K D H D G D Y K D H D I D Y K D D D D K M A P K K R K V G I H G V P A A M A E R P F Q C R I C M Q K F A R N D H R T T H T K I H T G E K P F Q C R I C M Q N F S Q K A H L I R H I R T H T G E K P F A C D I C G R K F A  
Q K G T L G E H T K I H T G S Q K P F Q C R I C M Q N F S R G R D L S R H I R T H T G E K P F A C D I C G R K F A R R D N L S H S T K I H L R G S Q L V K S E L E E K K S E L R H K L K Y V P H E Y I E L I E I A R N S T Q D R  
I L E M K V M E F F M K V Y G Y R G K H L G G S R K P D G A I Y T V G S P I D Y G V I V D T K A Y S G G Y N L P I G Q A D E M Q R Y V K E N Q T R N K H I N P N E W W K V Y P S S V T E F K F L F V S G H F K G N Y K A Q L T R  
L N R K T N C N G A V L S V E E L L I G G E M I K A G T L T L E E V R R K F N N G E I N F \*\*

> 65768 Right ZFN Q4-1234

M D Y K D H D G D Y K D H D I D Y K D D D D K M A P K K R K V G I H G V P A A M A E R P F Q C R I C M Q K F A R N D H R T T H T K I H T G E K P F Q C R I C M Q N F S Q K A H L I R H I R T H T G E K P F A C D I C G Q K F A  
Q K G T L G E H T K I H T G S Q K P F Q C R I C M Q N F S R G R D L S R H I R T H T G E K P F A C D I C G Q K F A R R D N L S H S T K I H L R G S Q L V K S E L E E K K S E L R H K L K Y V P H E Y I E L I E I A R N S T Q D R  
I L E M K V M E F F M K V Y G Y R G K H L G G S R K P D G A I Y T V G S P I D Y G V I V D T K A Y S G G Y N L P I G Q A D E M Q R Y V K E N Q T R N K H I N P N E W W K V Y P S S V T E F K F L F V S G H F K G N Y K A Q L T R  
L N R K T N C N G A V L S V E E L L I G G E M I K A G T L T L E E V R R K F N N G E I N F \*\*

> 65769 Right ZFN Q4-F1245

M D Y K D H D G D Y K D H D I D Y K D D D D K M A P K K R K V G I H G V P A A M A E R P F Q C R I C M Q K F A R N D H R T T H T K I H T G E K P F Q C R I C M Q N F S Q K A H L I R H I R T H T G E K P F A C D I C G R K F A  
Q K G T L G E H T K I H T G S Q K P F Q C R I C M Q N F S R G R D L S R H I R T H T G E K P F A C D I C G Q K F A R R D N L S H S T K I H L R G S Q L V K S E L E E K K S E L R H K L K Y V P H E Y I E L I E I A R N S T Q D R  
I L E M K V M E F F M K V Y G Y R G K H L G G S R K P D G A I Y T V G S P I D Y G V I V D T K A Y S G G Y N L P I G Q A D E M Q R Y V K E N Q T R N K H I N P N E W W K V Y P S S V T E F K F L F V S G H F K G N Y K A Q L T R  
L N R K T N C N G A V L S V E E L L I G G E M I K A G T L T L E E V R R K F N N G E I N F \*\*

> 65770 Right ZFN Q5-F12345

M D Y K D H D G D Y K D H D I D Y K D D D D K M A P K K R K V G I H G V P A A M A E R P F Q C R I C M Q K F A R N D H R T T H T K I H T G E K P F Q C R I C M Q N F S Q K A H L I R H I R T H T G E K P F A C D I C G Q K F A  
Q K G T L G E H T K I H T G S Q K P F Q C R I C M Q N F S R G R D L S R H I R T H T G E K P F A C D I C G Q K F A R R D N L S H S T K I H L R G S Q L V K S E L E E K K S E L R H K L K Y V P H E Y I E L I E I A R N S T Q D R  
I L E M K V M E F F M K V Y G Y R G K H L G G S R K P D G A I Y T V G S P I D Y G V I V D T K A Y S G G Y N L P I G Q A D E M Q R Y V K E N Q T R N K H I N P N E W W K V Y P S S V T E F K F L F V S G H F K G N Y K A Q L T R  
L N R K T N C N G A V L S V E E L L I G G E M I K A G T L T L E E V R R K F N N G E I N F \*\*

## Supplementary Table 20

### mRNA PCR template primers:

N80pt: GCAGAGCTCTCTGGCTAACTAGAG

R560: TTTTTTTTTTTTTTTTTTTTTTTTTTTTTTTTTTTTTTTTTTTTTTTTTTTTTTTTTTTTTCTGGCAACTAGAAGGCACAG

### Oligos used for DNA binding and off-rate experiments (target duplexes have 5' biotin on bottom strand)

|                 |                                                                       |
|-----------------|-----------------------------------------------------------------------|
| N80pt           | GCAGAGCTCTCTGGCTAACTAGAG                                              |
| C-HATAG-Fok     | GCGTAAAGCTTATCAGGCGTAGTCGGGCACGTCGTAGGGGTAGCCGATCCGTTGATCTCGCCGTTGTTG |
| AV-ELISA-onR-t  | TAATGGGGCCACTAGGGACAGGATTGGTGACAGTTCACAGTCAGTCCACACGTC                |
| AV-ELISA-onR-b  | GACGTGTGGACTGACTGTGAACGTCAACCAATCCTGTCCCTAGTGGCCCCATTA                |
| AV-ELISA-onL-t  | TAATTAGTGGCCCCACTGTGGGGTGGAGGGGATTCACAGTCAGTCCACACGTC                 |
| AV-ELISA-onL-b  | GACGTGTGGACTGACTGTGAATCCCTCCACCCACAGTGGGGCCACTAATTA                   |
| AV-ELISA-OT1R-t | TAATGTTTTGGCTGGGGTGGATTGGTGCTCTTTCACAGTCAGTCCACACGTC                  |
| AV-ELISA-OT1R-b | GACGTGTGGACTGACTGTGAAAGAGCACCAATCCACACCCAGCCAAAACATTA                 |
| AV-ELISA-OT1L-t | TAATCAGCCAAAACACTGTGGGCTAACCTAGATTTCACAGTCAGTCCACACGTC                |
| AV-ELISA-OT1L-b | GACGTGTGGACTGACTGTGAATCTAGGTTAGCCACAGTGTTTTGGCTGATTA                  |

PCR primers for indel assays. UIDs that required nested PCR are indicated with an asterisk.

## AAVS1 ZFN locus specific primer info

| hg38 coordinates | UID       | Forward primer (5' to 3')                    | Reverse primer (5' to 3')                |
|------------------|-----------|----------------------------------------------|------------------------------------------|
| chr19 55115768   | AAVS1-on  | ACACGACGCTCTCCGATCTNNNNGTGTCCACCAGATAAGGAAT  | GACGTGTGCTCTCCGATCTGGCTCTGGTCTGGTACTTTTA |
| chr1 198172184   | AAVS1-OT1 | ACACGACGCTCTCCGATCTNNNNGTAGACATATCAGTAATGCT  | GACGTGTGCTCTCCGATCTTTCAGAGAGAGGGGAGGG    |
| chr3 184229818   | AAVS1-OT2 | ACACGACGCTCTCCGATCTNNNNGTACCCAGAGCCAGCCCG    | GACGTGTGCTCTCCGATCTTGGGAAAGGCAAAGAGGGG   |
| chr3 50189772    | AAVS1-OT3 | ACACGACGCTCTCCGATCTNNNNACCTGAAACAGAGCACCAG   | GACGTGTGCTCTCCGATCTGAGAAATTCATCCAGAGCAG  |
| chr20 35020704   | AAVS1-OT4 | ACACGACGCTCTCCGATCTNNNNCATGCTGGTTTCCTCCCTAGA | GACGTGTGCTCTCCGATCTCTCCAGATGTGCAAGGTTCCC |

## AAVS1 parental (sorted by capture events)

|                 |            |                                                   |                                              |
|-----------------|------------|---------------------------------------------------|----------------------------------------------|
| chr1 198172184  | SKEPBNNNE  | ACACGACGCTCTCCGATCTNNNNCGAGTTAATGAATGAGCTGGAGA    | GACGTGTGCTCTCCGATCTGGAGAAAAGAGTCTGGTATGG     |
| chr3 50189772   | ZXIDAYVB   | ACACGACGCTCTCCGATCTNNNNACCTGAACAGAGCACCAG         | GACGTGTGCTCTCCGATCTGAGAAATTCATCCAGAGCAG      |
| chr1 181141476  | NJKWJSVI   | ACACGACGCTCTCCGATCTNNNNACACAGGATGCTTGCAATTC       | GACGTGTGCTCTCCGATCTTTGCAAAGAGACAGACATCAGC    |
| chr3 184229818  | MDQZVDQD   | ACACGACGCTCTCCGATCTNNNNGTACCCAGAGCCAGCCCG         | GACGTGTGCTCTCCGATCTGGAGAGGTGTCCGGCCAGG       |
| chr1 3779130    | MXMIJAI I  | ACACGACGCTCTCCGATCTNNNNCATCTGACACACCCAGGGCAG      | GACGTGTGCTCTCCGATCTTGTGAGACCTGGACCCACTT      |
| chr20 35020704  | TWCVQKCB   | ACACGACGCTCTCCGATCTNNNNGTGTGACGAGAAAAGGCTACT      | GACGTGTGCTCTCCGATCTCTGAGCCTTGAAGTAGTCCAAG    |
| chr17 64036794  | YLASZVZQ   | ACACGACGCTCTCCGATCTNNNNCTTGTCTCAGAGCCAAAGTCTAC    | GACGTGTGCTCTCCGATCTGAAGCATTCCAGAACTAGGGT     |
| chr12 47782518  | ADCBEPET   | ACACGACGCTCTCCGATCTNNNNATATCAGGGCTGGTCTCTGTGG     | GACGTGTGCTCTCCGATCTCCCTTTAAACATCTGCCCTTCC    |
| chr15 84571034  | KKDXEDBN   | ACACGACGCTCTCCGATCTNNNNACAGCTTAAAGGACAACAGCAC     | GACGTGTGCTCTCCGATCTTGTCTGGACTCGTGACCC        |
| chr2 96859552   | FJNBJSRY   | ACACGACGCTCTCCGATCTNNNNGTACTTCTCTCTGGCCAG         | GACGTGTGCTCTCCGATCTTTTGTGGTCCCTGCCTGCCT      |
| chr11 61583600  | MDRBAFMZ   | ACACGACGCTCTCCGATCTNNNNGGGAGCTGGTGAGAGAAC         | GACGTGTGCTCTCCGATCTCAGATGGGAGCAAGCACTGG      |
| chr5 68225722   | VIJLI IJS  | ACACGACGCTCTCCGATCTNNNNGTATATCTCTGGAGTGACGCT      | GACGTGTGCTCTCCGATCTTTAGTAGGGGCTGTAGGACA      |
| chrX 15856772   | NBKTCEXS   | ACACGACGCTCTCCGATCTNNNNACGGGAGACTGTGTGATGAC       | GACGTGTGCTCTCCGATCTAGCCAAATATGTAATAGTCTGCT   |
| chr19 11139414  | KJKNKMQY   | ACACGACGCTCTCCGATCTNNNNGGGACAAATGACACCTCC         | GACGTGTGCTCTCCGATCTCTTAAATCTGAGCTGAGTGTGTCA  |
| chr11 76300996  | NTXEDNEC*  | ACACGACGCTCTCCGATCTNNNNCCCTCACTACCATCTTCAAC       | GACGTGTGCTCTCCGATCTCCAAAGTGCAGGATTACAGG      |
| chr19 49337262  | MECBHTDY   | ACACGACGCTCTCCGATCTNNNNCTGGGAATCCTCATCTCCACTC     | GACGTGTGCTCTCCGATCTCTGCCCTTGTTCGGTCTCTC      |
| chr8 140496946  | QYLTTQVE   | ACACGACGCTCTCCGATCTNNNNCTCACTCTCTAATCATGGGGTAC    | GACGTGTGCTCTCCGATCTGGCAACAAGATGAGACTCCG      |
| chr10 68842214  | DXZFWQVT   | ACACGACGCTCTCCGATCTNNNNATGCCCTATTGAAAGATGTTA      | GACGTGTGCTCTCCGATCTAAGCCCTCTGATCTATGAAACCT   |
| chr13 40205820  | VSVXAKZK   | ACACGACGCTCTCCGATCTNNNNACAAGAACAGAGCTATACAGTC     | GACGTGTGCTCTCCGATCTCCTTTGGCCTTGTCTATCTCTT    |
| chr12 103878180 | JKMTFMQJ   | ACACGACGCTCTCCGATCTNNNNCAAATCTCAGGTCAGAGGG        | GACGTGTGCTCTCCGATCTGCTCAGTTTCAATGATTTGGCT    |
| chr17 77279998  | FHXTXDNR   | ACACGACGCTCTCCGATCTNNNNATAAGGAAAGGGTGGACTCAG      | GACGTGTGCTCTCCGATCTTTGAGTAATCTGTCCAGCCACA    |
| chr3 37492070   | XSYSLVBY   | ACACGACGCTCTCCGATCTNNNNACACCCACTAATCTTCTAGACT     | GACGTGTGCTCTCCGATCTCCTTCAAGGTAGAGTAGAATCCAGT |
| chr19 1224746   | SPEYREZB   | ACACGACGCTCTCCGATCTNNNNCTGTGTGAGACCTGGGCTG        | GACGTGTGCTCTCCGATCTGAGTGGTCTGGCGCCCTT        |
| chr15 88834438  | QQLZCQAN   | ACACGACGCTCTCCGATCTNNNNAGAAAGAGGTCACCTCGAGTC      | GACGTGTGCTCTCCGATCTCTCTTGGCTCAGTACCAGC       |
| chr7 128456566  | MQDNQLMZ   | ACACGACGCTCTCCGATCTNNNNAGAGACTTCTAGGCAAGTTC       | GACGTGTGCTCTCCGATCTGGCACAATACACAACCCCTG      |
| chr22 21443968  | QJIWJSRD   | ACACGACGCTCTCCGATCTNNNNCCGGCTCTATCTGGTG           | GACGTGTGCTCTCCGATCTTCCCATCCCACTGAGCAG        |
| chr4 11364294   | XRANANFTP  | ACACGACGCTCTCCGATCTNNNNGTGTGACAGATAGAAGGAGTC      | GACGTGTGCTCTCCGATCTACTTGTAAATGCGAATCAATGTCAC |
| chr16 70428130  | VDDWEPHN   | ACACGACGCTCTCCGATCTNNNNGGATAACCTTGACACCAAAATG     | GACGTGTGCTCTCCGATCTCTGGCAAGACTGAGCTCATT      |
| chr2 36967986   | BZCTHMJW   | ACACGACGCTCTCCGATCTNNNNATAAGATCTAGGCTGTGTAGTGA    | GACGTGTGCTCTCCGATCTCAACAGAGAGACACAAATG       |
| chr5 1217650    | DHIKJQPW*  | ACACGACGCTCTCCGATCTNNNNAGGCATTTCCGACACCAG         | GACGTGTGCTCTCCGATCTATGGTGCATAAATATAACTCACT   |
| chr8 144515636  | WDRFAKAK   | ACACGACGCTCTCCGATCTNNNNTTCCAAAGCAGAAAAGAGTGACA    | GACGTGTGCTCTCCGATCTCACTTATGTTCCAAAGCAACAGG   |
| chr7 102050526  | LYCKVKHE   | ACACGACGCTCTCCGATCTNNNNGTAACTCATCTGGGCCGTTT       | GACGTGTGCTCTCCGATCTCTGGTTACCTCTCCGAAATG      |
| chr2 105038548  | MRRWYPER   | ACACGACGCTCTCCGATCTNNNNAGCGACCTCTCTTCAATTTG       | GACGTGTGCTCTCCGATCTAATCCCATCATTCTTCTCTGGC    |
| chr3 134287458  | SABXIKVE   | ACACGACGCTCTCCGATCTNNNNAGAGTCCACGGTTCAGGG         | GACGTGTGCTCTCCGATCTGGGCTTGTGTAAAAGCAGGTT     |
| chr17 39631920  | FYNZVSHV   | ACACGACGCTCTCCGATCTNNNNCAGAGTGTCTCTCTCAGGAG       | GACGTGTGCTCTCCGATCTATCTTCACTCTGGCTGTCTCGC    |
| chr8 47662294   | WSIPFRJC   | ACACGACGCTCTCCGATCTNNNNAGCATCTGAGGACTGGGACCA      | GACGTGTGCTCTCCGATCTATCTTGAAGAACTTGCACACCCC   |
| chr13 26591916  | BHSAIQNX   | ACACGACGCTCTCCGATCTNNNNGTAGTCTTTAGGACTCCGCTG      | GACGTGTGCTCTCCGATCTTTCCAGTACACATCCATTCTGTA   |
| chr1 31425552   | QNYSDREDF  | ACACGACGCTCTCCGATCTNNNNGTGGAGAAAGCTGGTGGG         | GACGTGTGCTCTCCGATCTTACAGTACAGAGGGCAGGATAG    |
| chr14 30550484  | XJTSWSTX   | ACACGACGCTCTCCGATCTNNNNACAGTGTGTTGAATGTAGAAAAGC   | GACGTGTGCTCTCCGATCTAGTGTACTCACTTCTTAGGTAT    |
| chr16 81258590  | KDEJCKMH   | ACACGACGCTCTCCGATCTNNNNGAAAACCCACATATGCAG         | GACGTGTGCTCTCCGATCTCATCTGAGAGTGTGACCAGAA     |
| chr15 81689072  | SVYIYHHM   | ACACGACGCTCTCCGATCTNNNNGTGACAGAGGATGGATGGAGTC     | GACGTGTGCTCTCCGATCTCATGGAGTGGCTACCTGTGAG     |
| chr18 11866942  | ZRIPZCKP   | ACACGACGCTCTCCGATCTNNNNATTAAGGACTACTGTGGGAC       | GACGTGTGCTCTCCGATCTGTGTGATCTGGACTGCAAGT      |
| chr10 73488048  | TBZMKTDDB* | ACACGACGCTCTCCGATCTNNNNAGCTGGTCTCGAACATATGAC      | GACGTGTGCTCTCCGATCTGGAGAAAGCACTTAATGTCTCTGA  |
| chr14 103531006 | EZMKEHSV   | ACACGACGCTCTCCGATCTNNNNTAGGGTCCAGGTTCCAGGAAGAG    | GACGTGTGCTCTCCGATCTCAGCTGATGGAGTTGGCTAAG     |
| chr18 48835990  | VSRTQVNE   | ACACGACGCTCTCCGATCTNNNNAGCTCCCTGTTGCAATTTGT       | GACGTGTGCTCTCCGATCTGCAAAATGTTGATGGGCTAGA     |
| chr2 25362220   | VVQSNHIL   | ACACGACGCTCTCCGATCTNNNNAAATGCTGACTGTTGATGGCT      | GACGTGTGCTCTCCGATCTCTGCTGCCATPCCACACAC       |
| chr15 70478526  | YPHQYDEL   | ACACGACGCTCTCCGATCTNNNNACACATCATGAAAACCTTATGTCTCA | GACGTGTGCTCTCCGATCTGAGGGTGGCCTGGGGAGAA       |
| chr1 31712738   | JJNQKMDV   | ACACGACGCTCTCCGATCTNNNNCTTGAATCCTGGAATCTCTGG      | GACGTGTGCTCTCCGATCTTCCCTTAGCCTTCTTCTAGCC     |
| chr15 40764304  | DBLKXVKK   | ACACGACGCTCTCCGATCTNNNNCCGGACACAGGCCCTAGG         | GACGTGTGCTCTCCGATCTCTGAGCCCGCTTCTCCACTC      |
| chr19 47470024  | TKYAIKMM   | ACACGACGCTCTCCGATCTNNNNGTATCAGAAGAACAGGACTGCA     | GACGTGTGCTCTCCGATCTCTGAGTCCCACTCCGCTCGGTC    |
| chr5 157216616  | YAYLTBWW   | ACACGACGCTCTCCGATCTNNNNCCACACCCAACTTGTGAACA       | GACGTGTGCTCTCCGATCTGACTGGTCTCTTCTTCTGCTC     |
| chr9 131820192  | CZCNILBV   | ACACGACGCTCTCCGATCTNNNNCATGCTTGCCTTGTGAG          | GACGTGTGCTCTCCGATCTAAACGCCACAGTAATTAGGACAG   |
| chr11 48138440  | QFSLQVNV   | ACACGACGCTCTCCGATCTNNNNATCTGAGACTTTATGACTGGGT     | GACGTGTGCTCTCCGATCTCAGGAGAGCTTACCAAGGC       |
| chr13 49996346  | JCCAEMFJ   | ACACGACGCTCTCCGATCTNNNNCGCTCCCAACGCGAATC          | GACGTGTGCTCTCCGATCTACTTCACTCCGATCTCAAGACC    |
| chr15 30452078  | FWVQARHY*  | ACACGACGCTCTCCGATCTNNNNGTAAGTGGTGCCTCAATGACT      | GACGTGTGCTCTCCGATCTTCTCTGACTCTGTGATCC        |

|       |           |           |                                                 |                                            |
|-------|-----------|-----------|-------------------------------------------------|--------------------------------------------|
| chr15 | 32555628  | HZSHMKN*  | ACACGACGCTCTCCGATCTNNNNCTCCTGACCTCGTGATCC       | GACGTGTGCTCTCCGATCTGTAACCTGGTGCCTAATGACT   |
| chr17 | 75033800  | PEMMYWRN  | ACACGACGCTCTCCGATCTNNNNCTGCTCGTAAAGTAAGATGGGG   | GACGTGTGCTCTCCGATCTAGTGTCCCTTTTCTAGAGAA    |
| chr19 | 2306802   | RERRZMVD  | ACACGACGCTCTCCGATCTNNNGTCTGAGTGAACCTCTCTAAGC    | GACGTGTGCTCTCCGATCTAGGATCTGAGTGGGAAGAAC    |
| chr7  | 98643926  | ARJTTBAY  | ACACGACGCTCTCCGATCTNNNGTCTGAGTCAATGCCAGGAATC    | GACGTGTGCTCTCCGATCTTCCAGGACAGAGCACCCA      |
| chrX  | 40329304  | FKPLWCDM  | ACACGACGCTCTCCGATCTNNNNCTACAGGCAGAGCACAAGAGG    | GACGTGTGCTCTCCGATCTGCCAGCCCAATATTAGAGAT    |
| chr12 | 113130622 | IACDAHRA  | ACACGACGCTCTCCGATCTNNNNCAGGCCCGGAACCAACCAG      | GACGTGTGCTCTCCGATCTCTTGGACCTAATGCTGTCCC    |
| chr12 | 54823166  | SERBMJRZ  | ACACGACGCTCTCCGATCTNNNNATCTTTGGGCCCTACATAAATC   | GACGTGTGCTCTCCGATCTTAGCTCTCTCTTCTGCCAG     |
| chr17 | 76685626  | FRHPJXMZ  | ACACGACGCTCTCCGATCTNNNNCCCTGTGGTATTGGAAATCTG    | GACGTGTGCTCTCCGATCTCTTCCAGCGGTACACACGTCAAA |
| chr18 | 41955254  | HQAHRQD   | ACACGACGCTCTCCGATCTNNNNAGGTTCCGTGTTGTGGGGC      | GACGTGTGCTCTCCGATCTTCCAGTCCACAACATATAGATGT |
| chr11 | 65614374  | NYDAMIMK  | ACACGACGCTCTCCGATCTNNNNTTCCGCTCTTCTCCCTCTCG     | GACGTGTGCTCTCCGATCTGGTCTGCCCTTTCCCTCT      |
| chr12 | 53051038  | ICXBPLCL  | ACACGACGCTCTCCGATCTNNNNAACAGAGAGATGGCAAGGAGA    | GACGTGTGCTCTCCGATCTACCCAGAGATGCAGTGAGGC    |
| chr20 | 37880952  | QPPTLWLN  | ACACGACGCTCTCCGATCTNNNNCATTAAGCAGCCGTGACAGGAC   | GACGTGTGCTCTCCGATCTCCCCATGACAGAGAGACTTC    |
| chr19 | 42291652  | WQCIKXCR  | ACACGACGCTCTCCGATCTNNNNTTCTGGCTCTTAACCTCCAGC    | GACGTGTGCTCTCCGATCTGGTACTGAGAAGGGCGGG      |
| chr2  | 217108872 | SXWDQNIIV | ACACGACGCTCTCCGATCTNNNNCTGAGCAGATAAGGGGCC       | GACGTGTGCTCTCCGATCTGGACTTCTTACTCTCCAGACCTT |
| chr22 | 22201860  | YATNKBTf  | ACACGACGCTCTCCGATCTNNNNCTGCTCCTCACTGTGCTG       | GACGTGTGCTCTCCGATCTCAACTGAGGTCACTGCTCAG    |
| chr3  | 195857016 | RYJYDEME  | ACACGACGCTCTCCGATCTNNNNCAAGAGGGAAGGGAGTAGCG     | GACGTGTGCTCTCCGATCTTGGCAAACTACTGGGTCCC     |
| chr7  | 5922514   | WLMMPNKS* | ACACGACGCTCTCCGATCTNNNNAGAGCAAGCAGAGGAGGC       | GACGTGTGCTCTCCGATCTTAGTGGGAAAAGCTGGGCC     |
| chr7  | 6802396   | SLHFRKHX* | ACACGACGCTCTCCGATCTNNNNAGTGGGAAAAGCTGGGCC       | GACGTGTGCTCTCCGATCTTGAAGCAAGCAGAGGAGGC     |
| chr1  | 39214102  | HVLXPDVJ  | ACACGACGCTCTCCGATCTNNNNGTAGTCTTTGGGCTAATCTCT    | GACGTGTGCTCTCCGATCTAGCTCCCTAAATAGAAGACTTC  |
| chr1  | 93699008  | RBFHVEHX  | ACACGACGCTCTCCGATCTNNNNCACACAACAAGGAATCGTG      | GACGTGTGCTCTCCGATCTAGAAGCAGGGGTTCCAGAAAAG  |
| chr8  | 60233954  | VCPBCJZX  | ACACGACGCTCTCCGATCTNNNNAACATCATCACTCAGACTGC     | GACGTGTGCTCTCCGATCTTTTTATCCCTGTCCATACTTTAC |
| chr11 | 45538310  | KLASFQI   | ACACGACGCTCTCCGATCTNNNNGATCAGAGTAGGACTAGGGAGC   | GACGTGTGCTCTCCGATCTCAAAGTCCCAGCCCCAAAG     |
| chr11 | 78017714  | FFFFMFZP* | ACACGACGCTCTCCGATCTNNNNGTAGTCTGGTCTCAAACCTC     | GACGTGTGCTCTCCGATCTAATTAAGATGCTGAATGGGTA   |
| chr11 | 78262418  | FDLEFDJL  | ACACGACGCTCTCCGATCTNNNNTAAGAAATGACATAGTCCCTGCAC | GACGTGTGCTCTCCGATCTTTTGTACCTCTCGCAGCAG     |
| chr17 | 44086880  | SLBEIFPM  | ACACGACGCTCTCCGATCTNNNNCCCCAATCCAGCCCTTTTCTT    | GACGTGTGCTCTCCGATCTAATGTACTCTTTGATGTGACTCA |
| chr22 | 18958826  | VWMCWWM   | ACACGACGCTCTCCGATCTNNNNCCAGGGTCACTCAGGCTCC      | GACGTGTGCTCTCCGATCTGATTAGTCACTCCCGCTGCAG   |
| chr3  | 111979030 | ERXCSXJY  | ACACGACGCTCTCCGATCTNNNNAAGTCCCGCTTCCAGCCTGAA    | GACGTGTGCTCTCCGATCTGTACCAGGCCGCCACAG       |
| chr3  | 184182170 | XHXZNQQA  | ACACGACGCTCTCCGATCTNNNNGAATAAAGGTAGCTGATGTCACA  | GACGTGTGCTCTCCGATCTCTTGTACTTGGCAATCCCCTTC  |
| chr5  | 148910878 | LYHFVJQ   | ACACGACGCTCTCCGATCTNNNNAGCAATCCCTGACCCACTC      | GACGTGTGCTCTCCGATCTTCATAGTACAGGATGGCTGGGAG |
| chr22 | 23187146  | IENDICDD  | ACACGACGCTCTCCGATCTNNNNCTGGTCTGAGCTTTACACATAG   | GACGTGTGCTCTCCGATCTTGATAAGTCACTTTCCAATGAT  |
| chr12 | 126442484 | PKHAHNTT  | ACACGACGCTCTCCGATCTNNNNCTCTCCAGGCATTGTTCTGTA    | GACGTGTGCTCTCCGATCTTGTGGGTGGCAATTTGAAGTCAA |
| chr20 | 45905200  | YRKJZYQW  | ACACGACGCTCTCCGATCTNNNNGCATTCACAGTCAGGGTCAAG    | GACGTGTGCTCTCCGATCTTGTGAATCCTCCAAGAACAGC   |
| chr6  | 40410142  | YZXHNKZD  | ACACGACGCTCTCCGATCTNNNNAGGCCCACTCTGTCCAG        | GACGTGTGCTCTCCGATCTGTTAGACCTCATCTCCAGC     |
| chr6  | 7389498   | VEBDINQI  | ACACGACGCTCTCCGATCTNNNNAGTGTGGAAAGCCCTG         | GACGTGTGCTCTCCGATCTCGTACCTTCTCAACTCCACCAC  |
| chr19 | 14571814  | XWFWJWAHS | ACACGACGCTCTCCGATCTNNNNAGTCTAGACCCAAACCAGATAC   | GACGTGTGCTCTCCGATCTCCAGACTACGGCTTCCCC      |
| chr21 | 44196402  | DFWCALML* | ACACGACGCTCTCCGATCTNNNNGATGTGGTCTCTCTCTG        | GACGTGTGCTCTCCGATCTGGACTGAAAAGAGGAAGCAAGC  |
| chr21 | 5065744   | QYWSLAVY* | ACACGACGCTCTCCGATCTNNNNACTGAAAAGAGGAAAGCAAGCC   | GACGTGTGCTCTCCGATCTCGTGTCTCTCTGCTGTTGAG    |
| chr5  | 180101344 | LIBTXVYV  | ACACGACGCTCTCCGATCTNNNNCACGCTCTGGAGGCCCTG       | GACGTGTGCTCTCCGATCTTCCAGCCCTGCCTCAGTG      |
| chr8  | 99656330  | VASSABCM  | ACACGACGCTCTCCGATCTNNNNCTGACACATTTCTTACCTCTG    | GACGTGTGCTCTCCGATCTTCAAGTCATAGGAATCTCTCAA  |
| chr3  | 14558032  | CTZKNSSC  | ACACGACGCTCTCCGATCTNNNNGTGCTAGATAAATAATATGTAACC | GACGTGTGCTCTCCGATCTTTCATGGAACGCATCAGATTC   |
| chr1  | 14112422  | WJTKDHJS  | ACACGACGCTCTCCGATCTNNNNGACAAACCACCACCGTTACTT    | GACGTGTGCTCTCCGATCTAAAGCCAGGACATCACTTCTTG  |

AAVS1-I479Q

|       |           |          |                                                |                                              |
|-------|-----------|----------|------------------------------------------------|----------------------------------------------|
| chr1  | 3779132   | KJVPDZHF | ACACGACGCTCTCCGATCTNNNNCTCATCTGACACACCCACGG    | GACGTGTGCTCTCCGATCTTGCCTTGAGACCTGGACC        |
| chr1  | 227672558 | QVDFYKLF | ACACGACGCTCTCCGATCTNNNNATAAATTTAGGGCATGTGGAGCT | GACGTGTGCTCTCCGATCTCTAGCTGAGAGGAGTAGGGAAG    |
| chr17 | 26601400  | YQBIBPD  | ACACGACGCTCTCCGATCTNNNNACGGGTATATCTTACATAACATC | GACGTGTGCTCTCCGATCTTCCCTTGCAGATCCACAGA       |
| chr10 | 39568572  | IYCWPMD  | ACACGACGCTCTCCGATCTNNNNACAGCAGTTGGAAAGACTCTG   | GACGTGTGCTCTCCGATCTCACACACAAAGGATTTACTGA     |
| chr10 | 39569918  | CAFSMHXH | ACACGACGCTCTCCGATCTNNNNCTATAGAGCAGTTGGAAAGACTC | GACGTGTGCTCTCCGATCTCACATAACACAAAGGATTTACTGAG |
| chr2  | 183113068 | NTFRFWMF | ACACGACGCTCTCCGATCTNNNNGGCAATTTCCCCAGATAAAT    | GACGTGTGCTCTCCGATCTTACACTTTAGACAGCCATTAC     |
| chr2  | 183113122 | IYCWNVV* | ACACGACGCTCTCCGATCTNNNNGGCAATTTCCCCAGATAAA     | GACGTGTGCTCTCCGATCTTCTCTTTATTACTGAATGGTAT    |
| chr22 | 19520532  | ZTPMRKJZ | ACACGACGCTCTCCGATCTNNNNGGCACAATCAACATCGTTGAAAC | GACGTGTGCTCTCCGATCTGGACGGAGCCTAAAATAAGCAT    |
| chr3  | 147172268 | QXFSZLDT | ACACGACGCTCTCCGATCTNNNNCTGTATTACGGTGTGATATTT   | GACGTGTGCTCTCCGATCTGATTGTGTCTAGAAATGTCAGA    |
| chr5  | 117958136 | ANXCBYPC | ACACGACGCTCTCCGATCTNNNNGAAATTTAACCTTGAAGTCAAGT | GACGTGTGCTCTCCGATCTTTATGTCAACCAGGGAGAGAG     |

AAVS1-Q481A

|       |           |           |                                                  |                                              |
|-------|-----------|-----------|--------------------------------------------------|----------------------------------------------|
| chr3  | 50189776  | ZZFPFRJV  | ACACGACGCTCTCCGATCTNNNNCAGGCCCTGGAGATAATCT       | GACGTGTGCTCTCCGATCTGAGCAGGTGTAGTGTCCCTG      |
| chr7  | 62438920  | RRHRMHDA  | ACACGACGCTCTCCGATCTNNNNCTCGATGCCAATTTCTATTCGATT  | GACGTGTGCTCTCCGATCTTCTCATAGAACAGAAATAGAAATGG |
| chr14 | 92269876  | KBWNPZYP* | ACACGACGCTCTCCGATCTNNNNAGTATTTCCATTACACACACAC    | GACGTGTGCTCTCCGATCTAAACACCTAGGTACATCATATT    |
| chr2  | 14095318  | IBPIPYFW  | ACACGACGCTCTCCGATCTNNNNGACTAACAATACGATATAATGCTC  | GACGTGTGCTCTCCGATCTATGTCATGAAAATGTTGGGCTTT   |
| chr1  | 98870749  | YFRQFTMX  | ACACGACGCTCTCCGATCTNNNNCAGGATTCAGCATATTTAACAACCT | GACGTGTGCTCTCCGATCTCCTTAGCACACCTTAGACATTT    |
| chr1  | 63096930  | WZYJICWT  | ACACGACGCTCTCCGATCTNNNNCAGAGAGAGGTCAGGTTCAAG     | GACGTGTGCTCTCCGATCTGCTTACCTTCTTCTTCCACTCT    |
| chr2  | 193181226 | PWJQBHMJ  | ACACGACGCTCTCCGATCTNNNNAGCACTGTAGCAATATAGATTTGGA | GACGTGTGCTCTCCGATCTTGTGAAGAAATTCGAAAGAGGC    |
| chr20 | 31534128  | ICATDKLF  | ACACGACGCTCTCCGATCTNNNNCTGTGCCATGTTGCCATG        | GACGTGTGCTCTCCGATCTGTGCGGAGTATCTTAAAGAC      |
| chr20 | 31534188  | VBVADNEB  | ACACGACGCTCTCCGATCTNNNNCTATGCAATCTCCGCCCTT       | GACGTGTGCTCTCCGATCTAATTCATAAGCCTCTCTGAGCA    |

|       |          |          |                                               |                                             |
|-------|----------|----------|-----------------------------------------------|---------------------------------------------|
| chr20 | 33775072 | FHYSBFJH | ACACGACGCTCTCCGATCTNNNNNGCCTACTTTTAAACAGCTAC  | GACGTGTGCTCTCCGATCTCCGAAGTTGTCCCTGTATAAATGT |
| chr20 | 62859688 | XWLFRJHE | ACACGACGCTCTCCGATCTNNNNACAGTAATTTGAAGAAGCTTAG | GACGTGTGCTCTCCGATCTCGACAGAGTGAGAGCCT        |

**PD1 locus specific primers**

|       |           |         |                                              |                                             |
|-------|-----------|---------|----------------------------------------------|---------------------------------------------|
| chr2  | 241858860 | PD1-on  | ACACGACGCTCTCCGATCTNNNNGACCCACCTACCTAAGAACC  | GACGTGTGCTCTCCGATCTGAGAAGGGCGGCACTCTGGT     |
| chr19 | 6002846   | PD1-OT1 | ACACGACGCTCTCCGATCTNNNNTCGCTGAGCATCTGGTFTA   | GACGTGTGCTCTCCGATCTCTTACAGGTGGGCGTCGTCAG    |
| chr13 | 19058833  | PD1-OT2 | ACACGACGCTCTCCGATCTNNNNTGAGAGGGCAAGGAAAAGGAG | GACGTGTGCTCTCCGATCTACATAGTAACCATGACAGACAGGT |
| chr12 | 121794802 | PD1-OT3 | ACACGACGCTCTCCGATCTNNNNCTCTTACTCCTCACCCCTGGG | GACGTGTGCTCTCCGATCTCTGGTAGGATCCCACTCTCG     |

**BCL11A locus specific primers**

|      |           |            |                                             |                                            |
|------|-----------|------------|---------------------------------------------|--------------------------------------------|
| chr2 | 60495266  | BCL11A-on  | ACACGACGCTCTCCGATCTNNNNGTCTCTTACCCACCC      | GACGTGTGCTCTCCGATCTCACCAGGGTCAATACAACCTTGA |
| chr8 | 119856442 | BCL11A-OT1 | ACACGACGCTCTCCGATCTNNNNGACTCCAGCCTAGCCGACT  | GACGTGTGCTCTCCGATCTCGCCGTTGCTCCAGATATGAT   |
| chr2 | 62164814  | BCL11A-OT2 | ACACGACGCTCTCCGATCTNNNNCATGCTCTAGTCTGCCTCTC | GACGTGTGCTCTCCGATCTGCCATTCTGATAGCTGTGTTCAT |

**TCRa locus specific primers**

55254\_55248 (TCRa parent TOP 96 primers)

|       |           |          |                                                 |                                             |
|-------|-----------|----------|-------------------------------------------------|---------------------------------------------|
| chr14 | 22550604  | TCRa-on  | ACACGACGCTCTCCGATCTNNNNCTCTTGGTTTTACAGATACGAAC  | GACGTGTGCTCTCCGATCTCTCACCTCAGCTGGACCACA     |
| chr9  | 128878060 | XWJQLHRN | ACACGACGCTCTCCGATCTNNNNACCATAAAGTATGATGGGACC    | GACGTGTGCTCTCCGATCTCTTACAGAGTGGCTGTGAG      |
| chr17 | 79736684  | XCTFZDRM | ACACGACGCTCTCCGATCTNNNNAAAGGGTACATGGAAGAGGTAG   | GACGTGTGCTCTCCGATCTCTCCCATCGTCACTTCTCTTC    |
| chr9  | 13565900  | KKWBKPIE | ACACGACGCTCTCCGATCTNNNNTTCTACTTACATTTCTCGGCCAT  | GACGTGTGCTCTCCGATCTTGGAGGAAACAGATTACAC      |
| chr7  | 158413556 | XPLMZTEA | ACACGACGCTCTCCGATCTNNNNCACTCTGGCCGTGTGACTAA     | GACGTGTGCTCTCCGATCTCTGCTGAGGTGCGCATGGAG     |
| chr19 | 35309590  | LKZTVIEC | ACACGACGCTCTCCGATCTNNNNGATCCACTCACTCTCGGCCCT    | GACGTGTGCTCTCCGATCTCCTTGAACATTCCAGGCAC      |
| chr17 | 362910    | SHMJMRFD | ACACGACGCTCTCCGATCTNNNNCATCAAGCAGCTTCTCTCCCTC   | GACGTGTGCTCTCCGATCTCTTAGGTGCTCCCTGGAAAG     |
| chr22 | 21709082  | BTPWRKTT | ACACGACGCTCTCCGATCTNNNNAGAAGCATCTCAAAATCCTTTT   | GACGTGTGCTCTCCGATCTTGTGTGTGGCCATGACCTAA     |
| chr12 | 109930438 | HTCRKDWA | ACACGACGCTCTCCGATCTNNNNGGATCATGAGAATAACAGGGTG   | GACGTGTGCTCTCCGATCTTCTCTGCTCTGTGGCAAATC     |
| chr6  | 44255520  | SEDDFKHA | ACACGACGCTCTCCGATCTNNNNAGAGCTTCGTATTGGCACCCAG   | GACGTGTGCTCTCCGATCTACCGGGTGAAGCCTTTAC       |
| chr12 | 53004488  | XMKVWIYL | ACACGACGCTCTCCGATCTNNNNCTTTTGGACCTATAACTTGTGT   | GACGTGTGCTCTCCGATCTAGGCTACTGAATGGAGAGT      |
| chr14 | 49621284  | TPKLEYIE | ACACGACGCTCTCCGATCTNNNNCAGCTGCTCTTCCCGCCG       | GACGTGTGCTCTCCGATCTTGTCTCCAGGACGCAAGCC      |
| chr2  | 26785730  | WKVSEDEK | ACACGACGCTCTCCGATCTNNNNAAATGTTTGAGGAAAGCGACTT   | GACGTGTGCTCTCCGATCTCAATCTGGTGTGTGCTTTGCG    |
| chr19 | 48508592  | EQPJAEWI | ACACGACGCTCTCCGATCTNNNNCTCTCAGCTGCCCTCTTCATG    | GACGTGTGCTCTCCGATCTGAGAGGACAGGATGGTGGAG     |
| chr8  | 129726442 | ETARWWEI | ACACGACGCTCTCCGATCTNNNNGGAGAAAGACATGGAAGAGGGG   | GACGTGTGCTCTCCGATCTCAGCATTGTCAAACAGCAGGAT   |
| chr1  | 28878370  | IESFEYSF | ACACGACGCTCTCCGATCTNNNNAAAGAGAAATGGGCTG         | GACGTGTGCTCTCCGATCTCATACTGGCCAACTTTTAAAT    |
| chr8  | 66664620  | NRRTZWSN | ACACGACGCTCTCCGATCTNNNNGAATCTCTGGCTATACTTCTCTGA | GACGTGTGCTCTCCGATCTGGCTCCCTATTACCCGAC       |
| chr19 | 33383802  | ZNYIZZDP | ACACGACGCTCTCCGATCTNNNNCTCTTGCCCTCCCTGTAAAGA    | GACGTGTGCTCTCCGATCTCGAAGAGGATGGCTCTGCATG    |
| chr12 | 56632406  | VKDNLVRB | ACACGACGCTCTCCGATCTNNNNCTCTCCCTGCCCTTTCCAGAG    | GACGTGTGCTCTCCGATCTGGAGGGGCGTGGCTACA        |
| chr2  | 26018400  | YABSYBZM | ACACGACGCTCTCCGATCTNNNNCTCAGGTGACAGCCAAAGACA    | GACGTGTGCTCTCCGATCTATACAGAAGTGCCTCTCTTT     |
| chr1  | 203006352 | DEVTPIPJ | ACACGACGCTCTCCGATCTNNNNCCAGCAGACTTCACTTATCAG    | GACGTGTGCTCTCCGATCTTGTGAGCTTTATTACAGGAGGG   |
| chr1  | 110517930 | TFPDLHII | ACACGACGCTCTCCGATCTNNNNTGAGATGATGTCATGATGTTCA   | GACGTGTGCTCTCCGATCTGTTCAACGACCTTTCTCTCATG   |
| chr1  | 234851754 | EDYTHBWA | ACACGACGCTCTCCGATCTNNNNACAATCAGAAGCAGTGGACA     | GACGTGTGCTCTCCGATCTGGCTGGAGTTTCAACCCCTCTT   |
| chr10 | 132515136 | XYPSNFMN | ACACGACGCTCTCCGATCTNNNNCTGGAGACGCTTTCAGGAG      | GACGTGTGCTCTCCGATCTTCTGCCATTTCCCCAGGTG      |
| chr22 | 23280666  | TSLFAJIL | ACACGACGCTCTCCGATCTNNNNTAAGGAAACAGAGGCTCCAAGA   | GACGTGTGCTCTCCGATCTAGAAAGCAAGGGTGGCCAG      |
| chr8  | 28528022  | LARFTWME | ACACGACGCTCTCCGATCTNNNNCCCTAAACAGAGTTCGAATTGAGA | GACGTGTGCTCTCCGATCTAGCATCCAATTACAACCAAGAGT  |
| chr3  | 72163900  | MTLPNNCS | ACACGACGCTCTCCGATCTNNNNCCAGCTTCCAGTTAAGTACG     | GACGTGTGCTCTCCGATCTACACACCTGGTGCATCATAT     |
| chr10 | 45235318  | IAXIAMEL | ACACGACGCTCTCCGATCTNNNNAACTCTGATCAATAGTGTTCAGTG | GACGTGTGCTCTCCGATCTATCTGGTGGCATTGCATTA      |
| chr22 | 20369586  | DEBNWLCQ | ACACGACGCTCTCCGATCTNNNNCTCTCATCCGGATCATAT       | GACGTGTGCTCTCCGATCTGTGAGGAGCTTCTGTCTCTTG    |
| chr6  | 110569182 | NZABWQBQ | ACACGACGCTCTCCGATCTNNNNGGACATCTTCACTGTTATGTTTC  | GACGTGTGCTCTCCGATCTTAGGCTGACTTATACACAAGG    |
| chr9  | 136086174 | LZZMEWTN | ACACGACGCTCTCCGATCTNNNNGAGAAACCAAGTCAACCCCTGG   | GACGTGTGCTCTCCGATCTGTTCTTCAACAGGAAGCAG      |
| chr9  | 98054342  | YIJMQTIS | ACACGACGCTCTCCGATCTNNNNCTTCCAACCAAGATCCCTAAC    | GACGTGTGCTCTCCGATCTAGGAAGAGTCTTGGTCTGGAG    |
| chr20 | 57941386  | IZQDXKLY | ACACGACGCTCTCCGATCTNNNNCAAAGCAAATGTGACCAAGGG    | GACGTGTGCTCTCCGATCTCTGGCCTGGATCCCTCTC       |
| chr22 | 18167878  | DMMQVQFS | ACACGACGCTCTCCGATCTNNNNGTGAGGAGCTTCTGTCTCTTGG   | GACGTGTGCTCTCCGATCTCTCTCACCCGGATCGTATAC     |
| chr1  | 25146536  | FZAIISEJ | ACACGACGCTCTCCGATCTNNNNCTCTCCCTCCCTTGGCTCTG     | GACGTGTGCTCTCCGATCTGTGAAGTTAAGTGGCTCCGGA    |
| chr12 | 107612674 | IBREIYLH | ACACGACGCTCTCCGATCTNNNNTGACCTTACAGTACACAGG      | GACGTGTGCTCTCCGATCTAAACGTTTACAAGTGGCTGTG    |
| chr16 | 2155772   | LLDTMKII | ACACGACGCTCTCCGATCTNNNNGAGAGGGGGGAACTACAC       | GACGTGTGCTCTCCGATCTCAGCCGCTTTCATGATGC       |
| chr15 | 34179254  | AXAAXBYZ | ACACGACGCTCTCCGATCTNNNNTTTGTGTTAGTCTTACAGGCTTGG | GACGTGTGCTCTCCGATCTAAGTAACTTTGGCCCTTTTGTCT  |
| chr6  | 118713042 | YTDVMDWE | ACACGACGCTCTCCGATCTNNNNGAAACTTCAATGACAAAAGGGCA  | GACGTGTGCTCTCCGATCTGTTCCATCCTTTAAACCAATCCA  |
| chr16 | 77191236  | FBXTXZZD | ACACGACGCTCTCCGATCTNNNNACCAGGAAAGTGTGATGCCA     | GACGTGTGCTCTCCGATCTCCCTCCAACACTTTCCGAAA     |
| chr4  | 3667514   | BZRHCWSA | ACACGACGCTCTCCGATCTNNNNATGAGAGGCTTAGTGAAGAACC   | GACGTGTGCTCTCCGATCTCCTGTTCTCTCTCAGTCACTAT   |
| chr6  | 52934244  | SDDEHTTT | ACACGACGCTCTCCGATCTNNNNAGACCAGTAAACACTCTCAAC    | GACGTGTGCTCTCCGATCTGGCCCGGAGTTTATCATTTCAT   |
| chr4  | 186954080 | LKPHBKNF | ACACGACGCTCTCCGATCTNNNNAAAGATGCTCTCAGTGTGATC    | GACGTGTGCTCTCCGATCTGAGTGGCTGGTGGTTTTCAAAA   |
| chr11 | 77199762  | RYHYNRJT | ACACGACGCTCTCCGATCTNNNNATACACTTCACTCCAGCAAT     | GACGTGTGCTCTCCGATCTGTCCATACCAGCAGCCACTC     |
| chr15 | 37345596  | EBHWKVD  | ACACGACGCTCTCCGATCTNNNNCTTAGTCTTGTAGGAATTA      | GACGTGTGCTCTCCGATCTGGTCAAACAATTAATTAAGTGCAG |
| chr2  | 3655228   | WSRSQWAH | ACACGACGCTCTCCGATCTNNNNCTCAGGCAATAAAGGAGAAAAG   | GACGTGTGCTCTCCGATCTCAGCCAGCCCACTTCTTC       |
| chr8  | 42391528  | XDDAAMTI | ACACGACGCTCTCCGATCTNNNNAGGAGGTCGAGGCTCCAG       | GACGTGTGCTCTCCGATCTGCGAGTTGTGATGTTAAGTGT    |

|       |           |           |                                                  |                                              |
|-------|-----------|-----------|--------------------------------------------------|----------------------------------------------|
| chr21 | 42533054  | DBZYIBDP  | ACACGACGCTCTCCGATCTNNNNCGTGACCGTGGAGCAGCTG       | GACGTGTGCTCTCCGATCTCAGCAGCCGGAAGTCTCTG       |
| chr20 | 60891662  | IBXSAVDX  | ACACGACGCTCTCCGATCTNNNNAGAAGGAAGACTCTGGACTCC     | GACGTGTGCTCTCCGATCTCTGCATTTTCATAGTCAACAACACA |
| chr5  | 36839152  | WLRXLDJS  | ACACGACGCTCTCCGATCTNNNNTTGAAGAGACAGTTGGAGCTG     | GACGTGTGCTCTCCGATCTGCCCCATCTGAAACATAGTGTAT   |
| chr12 | 21752278  | DDZYEDJV  | ACACGACGCTCTCCGATCTNNNNAAAGCAGTGTACTTTGAGTAAAGC  | GACGTGTGCTCTCCGATCTTGCTAAGTCATTTCTCACCTTGTA  |
| chr14 | 60248818  | YIKLWLHI  | ACACGACGCTCTCCGATCTNNNNAGTGGGGTTGTATCTGCAGG      | GACGTGTGCTCTCCGATCTGGCTATTAGTGGCCAGTAGAT     |
| chr3  | 57107802  | QXWFBSRZ  | ACACGACGCTCTCCGATCTNNNNAGACTTCTGGGGTCAAATCCAA    | GACGTGTGCTCTCCGATCTAAATACCCTCTGTGACAAACCT    |
| chr17 | 28712496  | CMNMXNVB  | ACACGACGCTCTCCGATCTNNNNCTCTCGAAGACCTAACTCCG      | GACGTGTGCTCTCCGATCTCAGCCTGCCCTGTTCTCCA       |
| chr6  | 35811616  | BVTRYWIS  | ACACGACGCTCTCCGATCTNNNNGTGGATGGGTAGAGTGCTC       | GACGTGTGCTCTCCGATCTTCTCCATCACTTCTCCCGCTG     |
| chr9  | 35001138  | RDBAZJJQ  | ACACGACGCTCTCCGATCTNNNNAGTATTCCTTAGTACCCGGAGC    | GACGTGTGCTCTCCGATCTCTTAAGAGCCGAAGAAGACAGG    |
| chr1  | 2480064   | ZCDTHNMR  | ACACGACGCTCTCCGATCTNNNNCAATGCAGACCCAGGGACC       | GACGTGTGCTCTCCGATCTCTGCACCTCCACCCCTCTG       |
| chr3  | 197746150 | BPYXAYVJ  | ACACGACGCTCTCCGATCTNNNNATAAAGACTCCCAGTTAAACCTG   | GACGTGTGCTCTCCGATCTCGATGGCTATCTCAAGCTTTG     |
| chr11 | 119024886 | MZPXCNTX  | ACACGACGCTCTCCGATCTNNNNCCCCCTCTTTCTCCCCG         | GACGTGTGCTCTCCGATCTTCTTCTCCCTACGAACAACCTCG   |
| chr3  | 195621368 | INFQRBBA  | ACACGACGCTCTCCGATCTNNNNCAAGGATGGTGTCTCTCTATG     | GACGTGTGCTCTCCGATCTGTGAAGAAATGTTCCCTGAATTAC  |
| chr7  | 101364162 | PMFYXADV  | ACACGACGCTCTCCGATCTNNNNCCAGGGCTCTCTCTCTCTC       | GACGTGTGCTCTCCGATCTCGAGTTATGCAAAAGAGGGCG     |
| chr17 | 81941032  | ARQLSMVE  | ACACGACGCTCTCCGATCTNNNNTTGGATCGAAACAGAAGACT      | GACGTGTGCTCTCCGATCTTGGTGGCCCTGAGTGTGAT       |
| chr4  | 79325484  | YNIQWQZK  | ACACGACGCTCTCCGATCTNNNNCGAGAGATCCCCTTCATAG       | GACGTGTGCTCTCCGATCTTGACGCTCAGGAAGAGTAACC     |
| chr15 | 45153400  | TNVTBJZB  | ACACGACGCTCTCCGATCTNNNNATCTTGGGCTGAATGAGTGAGC    | GACGTGTGCTCTCCGATCTAAGAGAGGACGCTGAGGGG       |
| chr20 | 25223350  | VWRKYHXL  | ACACGACGCTCTCCGATCTNNNNCCCTACCCTGCAGCCCTG        | GACGTGTGCTCTCCGATCTCTAATCTGGCTTCTCCGGCTG     |
| chr8  | 104793608 | LTHVFMCV  | ACACGACGCTCTCCGATCTNNNNGGCCTCAACACTTCTGGG        | GACGTGTGCTCTCCGATCTGGCATAATTATTATCAGTCCAATG  |
| chr1  | 14131644  | JKQKHBIV  | ACACGACGCTCTCCGATCTNNNNAACTTATTGACTGTGAGGCG      | GACGTGTGCTCTCCGATCTATCTCTTTTAGCTCAATTAAC     |
| chr1  | 244063132 | TXDHHBXE  | ACACGACGCTCTCCGATCTNNNNAGTGATGATTGAAAGTCACAA     | GACGTGTGCTCTCCGATCTGGGAAGGTATGAAATGTTTGT     |
| chr17 | 40100232  | QJQRDRQN  | ACACGACGCTCTCCGATCTNNNNCTAAGGGCGGGAGTGGAC        | GACGTGTGCTCTCCGATCTCCCTCAAGCTCCAAACCTTCT     |
| chr5  | 169869406 | DHYFMKBL  | ACACGACGCTCTCCGATCTNNNNTTAAAGGGGATTGAAAGTAACT    | GACGTGTGCTCTCCGATCTAGTGGCAATTTTCTTTATGTT     |
| chr6  | 31769912  | QIATWCZQ  | ACACGACGCTCTCCGATCTNNNNAGTGAAGCAGAAGGAATATGGC    | GACGTGTGCTCTCCGATCTTCTTCCCGTTTCTCCTGGC       |
| chr7  | 149866310 | ZKNPDXEK  | ACACGACGCTCTCCGATCTNNNNCTGGGAGGTGTACTATCTGC      | GACGTGTGCTCTCCGATCTCTTCCACGAGTTCACATCCAC     |
| chr1  | 241848280 | SPWFQCMN  | ACACGACGCTCTCCGATCTNNNNAAAGTTACCGGTGTCTGCGTTG    | GACGTGTGCTCTCCGATCTGTCTCTCACCTCCGAG          |
| chr22 | 19218188  | DTQHDLK   | ACACGACGCTCTCCGATCTNNNNAGAGATAATGAAAGACCAGCAGC   | GACGTGTGCTCTCCGATCTGTGACTTATGTTGGTACTGGG     |
| chr3  | 195749386 | CFYRZEWN  | ACACGACGCTCTCCGATCTNNNNCTTACCAAGGATGGTGTG        | GACGTGTGCTCTCCGATCTGAAGCTGAAAGAGTAGAAGAAATG  |
| chr8  | 60701070  | HHNQPLD   | ACACGACGCTCTCCGATCTNNNNACGTTATGTTGAGTTGGAAAGTG   | GACGTGTGCTCTCCGATCTGTGCTCAGCAAGATGATC        |
| chr11 | 62401684  | NVHPZDCI  | ACACGACGCTCTCCGATCTNNNNGTCCCTTGCCTCTCTC          | GACGTGTGCTCTCCGATCTCTTGTCTCATGGAGCCCTGC      |
| chr8  | 139813412 | SMDYTEVI  | ACACGACGCTCTCCGATCTNNNNACTCCTCTGTCCACAAG         | GACGTGTGCTCTCCGATCTATCTGCCATCGTTCTAGAGGAC    |
| chr1  | 247540474 | MAFCJREV  | ACACGACGCTCTCCGATCTNNNNCCCTGATGTTTACTTCAAT       | GACGTGTGCTCTCCGATCTTCTGACAGAACAGACATAAGT     |
| chr16 | 81696616  | HAPFIVTW  | ACACGACGCTCTCCGATCTNNNNCTTCCCTGTCTGGCAGGTC       | GACGTGTGCTCTCCGATCTTGTCCCACTGCGTACCATG       |
| chr2  | 171158996 | VRJHWIQW  | ACACGACGCTCTCCGATCTNNNNGTCTTCCGTGAATTTCTAGAGCA   | GACGTGTGCTCTCCGATCTAAGTGTTTTGTGCCCTGAATCC    |
| chr20 | 46196718  | ZCWJDJMW  | ACACGACGCTCTCCGATCTNNNNCAGGCTGGGTGGGAAC          | GACGTGTGCTCTCCGATCTGGCCCTTTCTGTGATGAGCTC     |
| chr3  | 56682902  | VRTAHJRX  | ACACGACGCTCTCCGATCTNNNNTTGGCTCAGCGATGTTGA        | GACGTGTGCTCTCCGATCTCGGATCGGAGTTGGGAAAGTG     |
| chr10 | 87861594  | KXSACKKD  | ACACGACGCTCTCCGATCTNNNNCTTGTAGATCTTGCAGGGTG      | GACGTGTGCTCTCCGATCTCAAACCTGCAAGTCTGTTTACA    |
| chr17 | 44520096  | QXCWCVHH  | ACACGACGCTCTCCGATCTNNNNGTCAAGGCTGCAAGTGG         | GACGTGTGCTCTCCGATCTAGTAAAGTCTCTGAGGTGAT      |
| chr6  | 32683930  | EIRDKXYC  | ACACGACGCTCTCCGATCTNNNNACATGAGCCTCAAAGATGGGATT   | GACGTGTGCTCTCCGATCTGATCTAGTAAAGGGCCATCTTG    |
| chrX  | 119851942 | PSKDVCFX  | ACACGACGCTCTCCGATCTNNNNATCTTCAATACCACCTTAAGA     | GACGTGTGCTCTCCGATCTGTTGACTAATTTCTGAGCATTGGG  |
| chr15 | 78776288  | RTRPJABA  | ACACGACGCTCTCCGATCTNNNNCTCCGTGAGCAGATGGACC       | GACGTGTGCTCTCCGATCTTCTCAGTAGTGGTGTCTCAGTG    |
| chr19 | 19384988  | XBKCTIRP  | ACACGACGCTCTCCGATCTNNNNGATTTCTCAAATGCTCCTTAGGG   | GACGTGTGCTCTCCGATCTTGCCTGCCCGGTTTCTG         |
| chr2  | 240904936 | IRTINMPX  | ACACGACGCTCTCCGATCTNNNNAGTGGGTGCTCCTCAGTCTG      | GACGTGTGCTCTCCGATCTGTGGGCTTCACTGGACAG        |
| chr5  | 164600842 | JMMKRSZLT | ACACGACGCTCTCCGATCTNNNNCATGGTGTATTCAAATTTGCATCAG | GACGTGTGCTCTCCGATCTCCAGTAGTATGCATATCAATAATAC |
| chr6  | 136644276 | KPZJSQJW  | ACACGACGCTCTCCGATCTNNNNGTGCTGCCAGGGAAGCTTC       | GACGTGTGCTCTCCGATCTCTCATCAGCCCTCCTTGTG       |
| chr7  | 151203002 | BLTENBAQ  | ACACGACGCTCTCCGATCTNNNNTGAACCTTGGCCATCCATCCTC    | GACGTGTGCTCTCCGATCTGACTGAGCCATAAATCTAGTGC    |
| chr11 | 66419980  | HXIMTHJQ  | ACACGACGCTCTCCGATCTNNNNGTAGGTGAGGGGCTCATGGAG     | GACGTGTGCTCTCCGATCTGGAATCCAGCTCCATATTAGG     |
| chr15 | 20638152  | BAICRBQY  | ACACGACGCTCTCCGATCTNNNNAACTGAGAGCTCCTTCCA        | GACGTGTGCTCTCCGATCTCAAACACTATAAGCTCTGGGG     |
| chr15 | 22362236  | HWLNITFL  | ACACGACGCTCTCCGATCTNNNNAAAACATAAGCTCTTGGGG       | GACGTGTGCTCTCCGATCTCAACCTGAGAGCTCCTTCC       |

68796\_68853 (Pair13)

|       |           |          |                                                  |                                             |
|-------|-----------|----------|--------------------------------------------------|---------------------------------------------|
| chr17 | 362912    | ZQSLATFH | ACACGACGCTCTCCGATCTNNNNCATCAACGACCTTCTTCCCTC     | GACGTGTGCTCTCCGATCTCTTAGGTGCTCCCTGGAAGAG    |
| chr3  | 52219054  | XADRXSHT | ACACGACGCTCTCCGATCTNNNNCCACATGCAAAATATGGTTCC     | GACGTGTGCTCTCCGATCTCTGGCTGGAGTCTAGGGAAGT    |
| chr15 | 44711562  | TJFLQKIC | ACACGACGCTCTCCGATCTNNNNTTAATATAAGTGGAGGCGTGGG    | GACGTGTGCTCTCCGATCTGAGAGACTCAGCTGGATAG      |
| chr19 | 6929724   | IKDPDZBT | ACACGACGCTCTCCGATCTNNNNCTGGGTCAAGCAATATT         | GACGTGTGCTCTCCGATCTCGAGGAGGCAAACTACG        |
| chr9  | 128878058 | DTHBTWWR | ACACGACGCTCTCCGATCTNNNNAAATAGTCCAGCTCCACCATA     | GACGTGTGCTCTCCGATCTGTGAGCCAGGACCCACAGATA    |
| chr11 | 65980906  | ZEMRVLJZ | ACACGACGCTCTCCGATCTNNNNGTGAACCTGGGAAGCGGA        | GACGTGTGCTCTCCGATCTCTGAGTAGGTGGGATTACAGG    |
| chr12 | 53004488  | ABPQKADN | ACACGACGCTCTCCGATCTNNNNCTTTGTGACCTATAACTTGTGT    | GACGTGTGCTCTCCGATCTAGGCTACTGAATGGAGAGT      |
| chr10 | 42079890  | LRRIEHEA | ACACGACGCTCTCCGATCTNNNNTTGGTCTCGAATGGAATCATTATCA | GACGTGTGCTCTCCGATCTTCCGATCCATTTCGATGATCTAT  |
| chr10 | 42081716  | NYNCXWIF | ACACGACGCTCTCCGATCTNNNNGGAATCATCGAATGGTCAGCAA    | GACGTGTGCTCTCCGATCTtcagatgccattcgatgattctat |
| chr1  | 143197542 | TFAQLAVL | ACACGACGCTCTCCGATCTNNNNTCGAATGGACTCAAATGGAATT    | GACGTGTGCTCTCCGATCTATTCCATTCATCCGCTCCGAT    |

68796\_68861 (Pair 14)

|       |        |          |                                              |                                          |
|-------|--------|----------|----------------------------------------------|------------------------------------------|
| chr17 | 362912 | TSCRDDZC | ACACGACGCTCTCCGATCTNNNNCATCAACGACCTTCTTCCCTC | GACGTGTGCTCTCCGATCTCTTAGGTGCTCCCTGGAAGAG |
|-------|--------|----------|----------------------------------------------|------------------------------------------|

|                              |           |          |                                                   |                                             |
|------------------------------|-----------|----------|---------------------------------------------------|---------------------------------------------|
| chr14                        | 90113594  | NEXDVQHN | ACACGACGCTCTCCGATCTNNNNGTGAAATCCAAATGAAATCTGGAG   | GACGTGTGCTCTCCGATCTCCGGCTCTCTCAGTTTCTTCTAA  |
| chr3                         | 52219056  | SILYJMAM | ACACGACGCTCTCCGATCTNNNNCCACATGCAAAATATGGTTCCC     | GACGTGTGCTCTCCGATCTCTGGCTGGAGTCTAGGGAAGT    |
| chr1                         | 109667898 | TAXEHLII | ACACGACGCTCTCCGATCTNNNNGCGATCATAGCTCAGTTCAGTC     | GACGTGTGCTCTCCGATCTCATGGGGCTAGGAGTAGGATCT   |
| chr1                         | 157197150 | LCMEQNHV | ACACGACGCTCTCCGATCTNNNNGCGCATTGCCCGACTAT          | GACGTGTGCTCTCCGATCTGTGTGGGAGGACTAAATAGA     |
| chr6                         | 31769916  | EDKICXHS | ACACGACGCTCTCCGATCTNNNNGATGAAGCAGAAGGAATATGGC     | GACGTGTGCTCTCCGATCTTTCTCCCGTTTCTCTGGC       |
| chr1                         | 143204642 | KYPASNKZ | ACACGACGCTCTCCGATCTNNNNCAATCCGTTCAATGATTCCA       | GACGTGTGCTCTCCGATCTCAGATGGAAACGAATGGA       |
| chr9                         | 131231218 | HBIQHWYH | ACACGACGCTCTCCGATCTNNNNATATGTAACATACTGAAAGTGGT    | GACGTGTGCTCTCCGATCTGGGAGGCGGAGTTTATAG       |
| chr17                        | 26603966  | WMBIJIVA | ACACGACGCTCTCCGATCTNNNNGTGGAAACGGAAATCATCTT       | GACGTGTGCTCTCCGATCTAAACCACAAAGCCCTCCAATC    |
| chr6                         | 43246754  | NXNXEYWF | ACACGACGCTCTCCGATCTNNNNTAAGGACGAAACCAACATGAGTG    | GACGTGTGCTCTCCGATCTCTACCCCTCCTCTGTCCCG      |
| <b>68876_68805 (Pair 59)</b> |           |          |                                                   |                                             |
| chr9                         | 128878058 | TNINAAYK | ACACGACGCTCTCCGATCTNNNNCACCATAAATAGTATGGGACC      | GACGTGTGCTCTCCGATCTTTCATTGACAAGTGGCTGTGAG   |
| chr17                        | 362908    | HMRXZLVC | ACACGACGCTCTCCGATCTNNNNCATCAACGACCTTCTCTCCCTC     | GACGTGTGCTCTCCGATCTCTTAGGTGCTCCCTGGAAGAG    |
| chr19                        | 35309582  | XIRXVSFJ | ACACGACGCTCTCCGATCTNNNNGATCCACTCCTCTCGGCCCT       | GACGTGTGCTCTCCGATCTCCTTGAACATTCCCAGGCAC     |
| chr17                        | 26881268  | ZBCDHJLV | ACACGACGCTCTCCGATCTNNNNGTGCAATTTATACCGTTTCCAAAGAA | GACGTGTGCTCTCCGATCTACTTTGTGATGATTGAGTTTAAC  |
| chr3                         | 185910172 | HNHHIKNR | ACACGACGCTCTCCGATCTNNNNTGCATAGTATTCATGTTGATAT     | GACGTGTGCTCTCCGATCTGTGCTATAAAGACACATGTACA   |
| chr6                         | 170171158 | HAMTZAQF | ACACGACGCTCTCCGATCTNNNNTTATTACTCTCTGTTCGGGGT      | GACGTGTGCTCTCCGATCTAGACAGTAACAACCCAGA       |
| chr9                         | 114733852 | XTEYQKJP | ACACGACGCTCTCCGATCTNNNNGAGCGAGATCACGCCACT         | GACGTGTGCTCTCCGATCTTCCATTCAATATTTTCAGACTGC  |
| <b>68876_68813 (Pair 60)</b> |           |          |                                                   |                                             |
| chr2                         | 15345444  | SMVWCLLS | ACACGACGCTCTCCGATCTNNNNGCCTACAACAGATAGAGACCCAA    | GACGTGTGCTCTCCGATCTTTTCTTGAGCAGTGGTTTGTGTA  |
| chr21                        | 8990878   | IJJLFSVJ | ACACGACGCTCTCCGATCTNNNNGCTCTCCCATGTCATCTCCTC      | GACGTGTGCTCTCCGATCTGTTTGGAGATAGCTGGGAGA     |
| chr1                         | 143199522 | CFKENZDM | ACACGACGCTCTCCGATCTNNNNTGGACTCGAATGGAATAATCATTGT  | GACGTGTGCTCTCCGATCTTGTGATTCCATTAGCTTCCGCT   |
| chr1                         | 143199578 | FFKLMLMT | ACACGACGCTCTCCGATCTNNNNCATCGGATGGGAATGAATGG       | GACGTGTGCTCTCCGATCTTGATTCCATTAGCTTCCGTTGG   |
| chr10                        | 93837534  | JZYQJEMI | ACACGACGCTCTCCGATCTNNNNCACTAGTCTCTCCATCCAAAAT     | GACGTGTGCTCTCCGATCTTTAAACAGGGTGGTCAAGTTGAGA |
| chr11                        | 93673350  | HQAFQCIL | ACACGACGCTCTCCGATCTNNNNGACCTGTCTCAAATATATATATGT   | GACGTGTGCTCTCCGATCTATCCAGATATGTACAATAGAGG   |
| chr12                        | 55375448  | QYWYTYSC | ACACGACGCTCTCCGATCTNNNNTTCCCTGATAATAGCTTCATAGGAT  | GACGTGTGCTCTCCGATCTGCTAGTGAATGAAAGGAGCC     |
| chr14                        | 50686876  | AJWVIEXB | ACACGACGCTCTCCGATCTNNNNGCCTGTATTCAAGCTTATTAAT     | GACGTGTGCTCTCCGATCTCAAAGTCTGGGATTACA        |
| chr14                        | 50686966  | CFSTYECJ | ACACGACGCTCTCCGATCTNNNNTGCAATTAAGGACTCCAGGCT      | GACGTGTGCTCTCCGATCTCCTACTACACACCCAGCTAACTT  |
| chr14                        | 63848848  | MHNJISJL | ACACGACGCTCTCCGATCTNNNNAATGATACCTTCCAAGCCCGC      | GACGTGTGCTCTCCGATCTCCTACTAGTCCAACATCTTAGAGA |
| <b>68876_68869 (Pair 63)</b> |           |          |                                                   |                                             |
| chr9                         | 128878054 | PJTZBMRZ | ACACGACGCTCTCCGATCTNNNNAATAGTCCGAGCTCCACCATAAA    | GACGTGTGCTCTCCGATCTAGCCAGGACCCACAGTATATTC   |
| chr17                        | 362912    | NXENAPNN | ACACGACGCTCTCCGATCTNNNNCATCAACGACCTTCTCTCCCTC     | GACGTGTGCTCTCCGATCTCTTAGGTGCTCCCTGGAAGAG    |
| chr3                         | 52219056  | ZLDYBYXW | ACACGACGCTCTCCGATCTNNNNCTCCACATGCAAAATATGGT       | GACGTGTGCTCTCCGATCTCTGGCTGGAGTCTAGGGAAGT    |
| chr1                         | 34213558  | BYPXMJSX | ACACGACGCTCTCCGATCTNNNNTTAAACATGAAATCCACACCTT     | GACGTGTGCTCTCCGATCTCCGGAAGGCTGAGGTGAGATAAT  |
| chr2                         | 218506758 | RRTWNYDS | ACACGACGCTCTCCGATCTNNNNAAGCCATTTCCATTGAA          | GACGTGTGCTCTCCGATCTGCAAAACTCCGCTCTCAA       |
| chr20                        | 47319050  | WWMIQLKZ | ACACGACGCTCTCCGATCTNNNNGCCTAGCCTCTCTGTTCAAAA      | GACGTGTGCTCTCCGATCTCTGGCCTGGTAAAGTGGTGACTC  |
| chr10                        | 38177402  | VSQLVDS  | ACACGACGCTCTCCGATCTNNNNGGCTATATGATGTTCTCCCT       | GACGTGTGCTCTCCGATCTTCTCTCCATGTCATCTGAGTACA  |
| chr12                        | 55494752  | EQVZDSWC | ACACGACGCTCTCCGATCTNNNNGCCTATAATCCACGACCTTTG      | GACGTGTGCTCTCCGATCTCACCACCTCCGCCAGCTAATTTT  |
| chr17                        | 35586862  | BQJREFEE | ACACGACGCTCTCCGATCTNNNNACATGCCCGAGAGATACTAT       | GACGTGTGCTCTCCGATCTGTGCTGCACGTAAGAGAGGTT    |
| chr20                        | 39075318  | YRJHEDZM | ACACGACGCTCTCCGATCTNNNNAAGCAACAGATTTAGCTTGA       | GACGTGTGCTCTCCGATCTCAATCCTCTGCTTGGCCT       |

\*Nested Primers

| UID      | Forward primer (5' to 3') | Reverse primer (5' to 3') |
|----------|---------------------------|---------------------------|
| NTXEDNEC | TGATAAAACCCAGTGGCTGTGAG   | GGAGTGGAAAGGAGGTAAGAGAG   |
| DHIKJQPW | CAGGTTTTATTTTGGACTGGCG    | ACTCAAGGACCCATCTGAAGAC    |
| TBZMKTDB | CCTACATGATTTCCAGGGACAT    | ATACTTCTACTCTGGCAAGCA     |
| SLHFRKH  | CATGTTTCATGTGCTGTCTCT     | CTGTAAGTGAGCCTCCTACCTC    |
| CFFFMFZP | GTTTCAGCTCCACAACAGTAGAC   | AAACTGAGGCTGTAAGAGGGAA    |
| DFWCALML | CGCGCTAAAATCCCATTCAAAA    | CATTAGGGGCATCTCACCTGA     |
| QYWSLAVY | TATGGCTTCAAACCAACCTGTA    | TCAACCTTAGATTTCGACGGTGA   |
| IYCWNVV  | TGGAAGAACATATTTGCAAACCG   | TGTTGCCCTTTTATAACCCAC     |
| BDXYHYTB | CTATACAACAGCCCATCAGC      | CACGGATCACCCAGTCATATAA    |
| KBWNPZYP | GTGTTTCTCCTCTTTGCAT       | TGAACATCAGTCAGTAGAGGCT    |

Oligos used for the DNA cleavage experiments

|                |                                                |
|----------------|------------------------------------------------|
| AAVS1_target_F | TCCCTCCACCCACAGTGGGGCCACTAGGGACAGGATTGGTGACAGA |
| AAVS1_target_R | CTGTCCAATCCTGTCCCTAGTGGCCCACTGTGGGGTGGAGGGAA   |

## GUIDE-seq oligos with various overhangs

The IDT codes for the oligos with different length randomized overhangs used in **Supplementary Figure 32** are below. Note that 34bp\_4N-OH\_2 is the GUIDE-seq oligo with randomized 4 bp 5' overhangs used in the majority of this work. 34bp\_blunt\_2 corresponds to the oligo used in the original GUIDE-seq publication.

34bp\_-5N-OH\_2

/5Phos/G\*T\*TTAATTGAGTTGTCATATGTTAATAACGGTAT (25252525) (25252525) (25252525) \* (25252525) \* (25252525)

/5Phos/A\*T\*ACCGTTATTAACATATGACAACCTCAATTAAAC (25252525) (25252525) (25252525) \* (25252525) \* (25252525)

34bp\_-4N-OH\_2

/5Phos/G\*T\*TTAATTGAGTTGTCATATGTTAATAACGGTAT (25252525) (25252525) \* (25252525) \* (25252525)

/5Phos/A\*T\*ACCGTTATTAACATATGACAACCTCAATTAAAC (25252525) (25252525) \* (25252525) \* (25252525)

34bp\_-3N-OH\_2

/5Phos/G\*T\*TTAATTGAGTTGTCATATGTTAATAACGGTAT (25252525) \* (25252525) \* (25252525)

/5Phos/A\*T\*ACCGTTATTAACATATGACAACCTCAATTAAAC (25252525) \* (25252525) \* (25252525)

34bp\_-2N-OH\_2

/5Phos/G\*T\*TTAATTGAGTTGTCATATGTTAATAACGGTAT\* (25252525) \* (25252525)

/5Phos/A\*T\*ACCGTTATTAACATATGACAACCTCAATTAAAC\* (25252525) \* (25252525)

34bp\_-1N-OH\_2

/5Phos/G\*T\*TTAATTGAGTTGTCATATGTTAATAACGGTAT\* (25252525)

/5Phos/A\*T\*ACCGTTATTAACATATGACAACCTCAATTAAA\*C\* (25252525)

34bp\_blunt\_2

/5Phos/G\*T\*TTAATTGAGTTGTCATATGTTAATAACGGT\*A\*T

/5Phos/A\*T\*ACCGTTATTAACATATGACAACCTCAATTAA\*A\*C

34bp\_1N-OH\_2

/5Phos/ (25252525) \*G\*TTAATTGAGTTGTCATATGTTAATAACGGT\*A\*T

/5Phos/ (25252525) \*A\*TACCGTTATTAACATATGACAACCTCAATTAA\*A\*C

34bp\_2N-OH\_2

/5Phos/ (25252525) \* (25252525) \*GTTAATTGAGTTGTCATATGTTAATAACGGT\*A\*T

/5Phos/ (25252525) \* (25252525) \*ATACCGTTATTAACATATGACAACCTCAATTAA\*A\*C

34bp\_3N-OH\_2

/5Phos/ (25252525) \* (25252525) \* (25252525) GTTAAATTGAGTTGTCATATGTTAATAACGGT\*A\*T

/5Phos/ (25252525) \* (25252525) \* (25252525) ATACCGTTATTAACATATGACAACCTCAATTAA\*A\*C

34bp\_4N-OH\_2

/5Phos/ (25252525) \* (25252525) \* (25252525) (25252525) GTTAAATTGAGTTGTCATATGTTAATAACGGT\*A\*T

/5Phos/ (25252525) \* (25252525) \* (25252525) (25252525) ATACCGTTATTAACATATGACAACCTCAATTAA\*A\*C

34bp\_5N-OH\_2

/5Phos/ (25252525) \* (25252525) \* (25252525) (25252525) (25252525) GTTAAATTGAGTTGTCATATGTTAATAACGGT\*A\*T

/5Phos/ (25252525) \* (25252525) \* (25252525) (25252525) (25252525) ATACCGTTATTAACATATGACAACCTCAATTAA\*A\*C

## Supplementary Note 1

### Cleavage rate studies

Our biochemical studies of cleavage rate were performed under conditions of excess enzyme to enforce single-turnover kinetics, with data analyzed as described in Sassa (*J. Vis. Exp.*, Sassa et al., 2013) to determine the first-order rate constant ( $k_{\text{obs}}$ ) of product formation. Under such conditions,  $k_{\text{obs}}$  will approximate  $k_2$  as long as this value exceeds the deadtime for mixing and assembly of enzyme-target complex. As hosts for this study, four-finger derivatives of our AAVS1 ZFNs were used, which were truncated to remove the two FokI-distal fingers. These hosts were chosen because they exhibited faster complex formation, relative to their six-finger counterparts, which enables discernment of a wider range of apparent  $k_{\text{obs}}$  values. Given the structural isolation of the removed fingers (separated from the FokI domains by four intervening fingers and approximately 35 Å in the DNA-bound complex) their absence should not affect FokI function.

As shown in **Supplementary Figure 6**, the cleavage time courses are well-fit via an exponential model of target decay, and the plots indicate a substantial slowing of catalysis by the Q481A FokI variant. While the parent FokI dimer yields a  $k_{\text{obs}}$  of  $2.0 \times 10^{-3} \text{s}^{-1}$ , this value is >20-fold lower ( $9.1 \times 10^{-5} \text{s}^{-1}$ ) for the dimer bearing two variant FokI domains. Mixed dimers (bearing one parent FokI domain and one Q481A variant) exhibit intermediate values. Critically, the half dose controls yield  $k_{\text{obs}}$  values that are almost identical those yielded by the full dose counterparts. This supports our assumption of limiting substrate, and also provides further evidence (along with the Western blot results) that the apparent  $k_{\text{obs}}$  reductions are not due to lower expression levels or specific activity of the variant ZFNs.

We note that while the reductions in observed cleavage rate revealed by these studies are both substantial and directionally consistent with our proposed mechanism, the effects aren't large enough to explain the full magnitude of specificity improvement (>1000-fold) seen in our cell studies. One possible explanation for this is that  $k_2$  for the parent FokI dimer is too fast to measure in this assay, due to the confounding effects of mixing and complex formation deadtime, and that the real value for this term is substantially higher than the  $k_{\text{obs}}$  we observe. Consistent with this, a prior study that examined the reaction rate of native FokI enzyme preloaded onto its target yielded a substantially faster  $k_{\text{obs}}$  value<sup>58</sup>. Other possible explanations are that our reaction buffer may not fully recapitulate conditions in mammalian nucleus, or that other mechanisms act in concert with a reduced  $k_2$  to achieve the large effects we observe in cells.

## Supplementary Note 2

### Data analysis for indel assay



All standard indel data displayed in Table 1, Figures 1-4, and Supplementary Figures 2, 10, 11, 16-22, 24, and 25 were processed using a combination of two separate strategies for separating *bona fide* indels from experimental artifacts. The first strategy is to disregard indels that are more than a specified distance from the expected nuclease cleavage site. Indels that do not overlap a specific region or “window” of the amplicon are excluded. For intended ZFN targets and well characterized off-target such as AAVS1 OT1, OT2, OT3, and OT4 this window is defined as the gap between the ZFP binding sites (generally 5-7 bp) plus an additional base on either side for total window sizes of 7-9 bp. For less well characterized off-target sites, the window is defined as 6 bp on either side of the peak of the distribution of oligo capture locations. For indels with multiple equivalent alignments (e.g. a 1 bp deletion within a string of 7 G’s), an indel is only excluded if all of the equivalent alignments fail to place the indel within or overlapping the sequence window. After this procedure, a further step is then employed to subtract out identical indels that occur in both the ZFN treated sample and the matched control sample. This step is agnostic to which sample is the ZFN treated sample and which is the control. For indels that occur with a non-zero frequency in both samples being compared, the lower of the two frequencies is subtracted from both samples and the corrected frequencies are then rounded to the nearest integral number of sequence reads. The resulting number of sequence reads scored as indels were then used to perform the statistical test described in **ref. 50**. The set of p-values from a logically related set of measurements (e.g. genomic DNA from cells treated with the AAVS1 Q481A FokI variants and tested at the 12 candidate off-target loci for this variant as derived from the oligo capture assay) were then corrected using the false discovery rate procedure of Benjamini and Hochberg.

Standard indel data displayed in Supplementary Figures 4-9 used an older data processing method that only excluded indels that occurred at similar frequencies in the ZFN treated sample and matched control. This older method is agnostic to the location of the indel within the amplicon and uses a different method for the subtraction. This older method excluded all occurrences of a given indel from both samples if they occur at frequencies that are not statistically different from each other as gauged by Fisher’s exact test with a significance level of 0.05.

The more sensitive version of the indel assay reported in Figure 2d and Supplementary figures 12 and 13 requires a different set of criteria to separate out experimental artifacts. Like the newer data processing method for standard indel data, indels that fall outside of a sequence “window” around the expected cleavage site are excluded. But this more sensitive version of the assay differs by using greater sequencing depth so that each input allele is sequenced multiple times (i.e. oversampling) and uses multiple technical replicates for each sample. The sensitivity of the assay can be adjusted by adjusting the number of technical replicates. Oversampling enables discrimination of rare technical artifacts from *bona fide* indels by virtue of their individual frequencies lying below the threshold expected from a multiply-sequenced input mutation and technical replicates allowed common background artifacts to be more accurately quantified and then subtracted via use of a negative control. Any indels that occurred at a frequency of less than 20% of the expected frequency (total sequence reads divided by the number of input genomes) were considered artifacts rather than *bona fide* indels. For each type of indel, the background samples were used to establish a mean background frequency and to determine the standard deviation ( $\sigma$ ) of background frequencies. For test samples, if the frequency of a particular indel is less than  $3\sigma$  above the mean frequency in the background samples then the indel is excluded as an artifact. If the frequency of a particular indel is more than  $3\sigma$  above the mean then the indel is considered real and its frequency is corrected by subtracting the mean frequency found in the background samples. In order to make a valid comparison between ZFN treated samples and GFP treated samples for the experiment shown in Figure 2e and supplementary Figure 13, the data was processed in two stages. The first stage defined the first 24 GFP replicates as background samples and used these to process the ZFN treated replicates and the second 24 GFP replicates. The second stage defined the second 24 GFP replicates as background and used these to process the first 24 GFP replicates. In this way each replicate was processed using a set of 24 GFP replicates to define background frequencies for each indel and no replicate used itself in the set of background replicates used to define background frequencies. We found both the cluster density and the amount of PhiX DNA added to the library prior to loading the NextSeq were critical to obtaining optimal results. The experiment shown in Figure 2d had a cluster density of 113 K/mm<sup>2</sup> and 17.05% of the reads aligned to PhiX. Note that this method is intended to measure samples where indel frequencies do not exceed 10% and where the control sequences are free from even the slightest contamination from sequences containing real indels. Excessive

indels in the control samples could cause real indels to be incorrectly filtered out and high overall indel levels can lead to chimeric PCR products containing combinations of indels that aren't present in the genomic DNA sample.

All Illumina data was first run through a custom data processing pipeline that utilizes several open source software packages. MiSeq data was first demultiplexed using a custom script after applying a q20 quality filter to the I1 and I2 index reads that contain the barcode sequences. NextSeq data was demultiplexed using Illumina bcl2fastq software. Demultiplexed paired reads were quality filtered using fastq\_quality\_filter from the FASTX toolkit (q15 for MiSeq and q13 for NextSeq). Paired reads were then combined and adapter trimmed using SeqPrep. Combined reads were then required to match the intended amplicon at the outer 23 bp of each edge of the intended amplicon to exclude mispriming. Combined reads were then mapped to hg38 using Bowtie2 and sequences that map better to something other than the intended locus were excluded. Finally, reads are mapped to the intended amplicon using the Biopython pairwise2 global aligner. The alignments are used to assign an "indelcode" to each sequence read where the indelcode only describes insertions or deletions and ignores base mismatches. These indelcodes are used to perform the various operations described above. Here is a description of the indelcode:

An example of the code is '113:D:43:x:113:155. The components of the code are:

- 113: starting location of the indel.
  - An asterisk is added if the indel has been merged with overlapping indels of the same type and size. More info about this below.
- D: indel type, 'D' for deletion and 'I' for insertion
- 43: indel size
- x: flankmatch flag indicating if the indel has flanking repeats.
  - x: no repeat
  - r: repeat was found
  - n: indel created a new duplication.
- 113: start of indel including flanking repeat and merges
- 155: end of indel including flanking repeat and merges

Other example indel codes are 109:D:4:x:109:112 (4bp deletion starting at position 109) and 109\*:I:4:n:109:116 (4bp insertion that creates a new 4bp duplication with ambiguity about which copy of the duplication comprises the insertion). 4bp insertions that duplicate existing sequence and do not expand an existing duplication are highly diagnostic of ZFN induced indel sequences.

### **Flow Cytometry Gating Strategy**

The gating strategy used for flow cytometry experiments is shown graphically below.

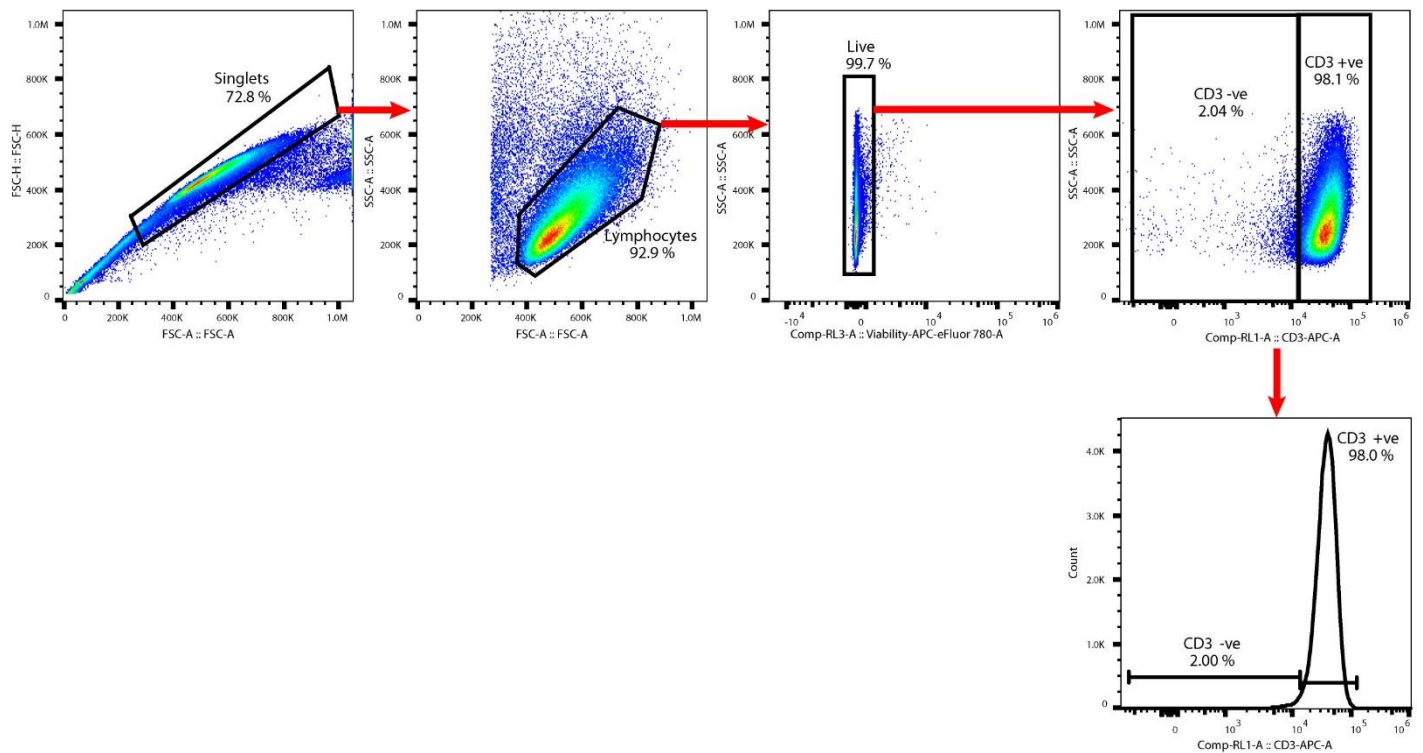

### Competitive DNA binding assay and dissociation rate assay

Both experiments utilized a previously described ELISA-based DNA binding assay<sup>14</sup>, except that DNA duplexes were created by annealing two site-specific oligos. Target duplexes were created by incorporating a 5' biotin on the bottom strand oligo and annealing this oligo with a 1.5-fold excess of the unlabeled top strand oligo. Competitor duplexes were created in the same manner except the bottom strand oligo did not contain a biotin.

This assay detects DNA binding by incubating a biotinylated DNA target site with an epitope-tagged DNA-binding protein and an antibody-peroxidase fusion, capturing protein-DNA complexes on a streptavidin coated plate, washing away unbound protein, and then reading out the peroxidase activity in each well of the plate. For the competitive DNA binding assay, non-biotinylated competitor DNA with the sequence of the ZFP binding site from either the intended target or OT1 was added to the reaction at various concentrations and data points were fit to the equation:

$$y = Max - \frac{(Max - Min)}{(1 + \frac{IC50}{X})}$$

Where y is the measured signal, x is the concentration of competitor DNA, Max is the signal with no competitor DNA, and Min is the background signal. The IC50 values determined by the curve fitting software (Microcal origin) were then used to determine the relative affinity values for different competitor DNA sequences.

For the dissociation experiments, the protein and biotinylated target sequence was incubated for 45 minutes and then a 100-fold excess of non-biotinylated target site was added to the reaction and the protein-DNA complexes were captured on the streptavidin plate at various time points. Data points were fit to the equation:

$$y = y_0 + Ae^{-\frac{x}{t}}$$

Where  $y$  is the measured signal,  $x$  is the time the measurement was taken,  $y_0$  is the assay background,  $A$  is the amplitude of the initial signal over background and  $t$  is the decay time constant.

### DNA cleavage rate experiments

DNA targets containing the target site for the AAVS1 ZFN pair were created as described<sup>11</sup>. Briefly, the target site was created by annealing two complementary oligos with 1 bp 3' adenine overhangs and then cloned into PCR2.1-TOPO (Invitrogen). The resulting clones were sequence-confirmed with Sanger sequencing. PCR primers were used to amplify a ~1kb region of the PCR2.1-TOPO plasmid surrounding the target sequence insertion site and were named 2.1TGT-F (5'-AGGGGAAACGCCTGGTATC-3') and 2.1TGT-R (5'TAGGGCGCTGGCAAGTGTAG-3'). The resulting PCR product was purified using a PCR cleanup kit (Qiagen) and quantified using a Nanodrop spectrophotometer (Thermo Scientific). ZFNs were expressed using the TnT quick coupled transcription-translation system (Promega). 100  $\mu$ l of TnT extract was mixed with 2  $\mu$ l of 1mM Methionine, 3.3  $\mu$ l of 2 mM ZnCl<sub>2</sub> and 5.6  $\mu$ l of the appropriate ZFN encoding plasmid at a concentration of 450 ng/ $\mu$ l. The reactions were then incubated at 30 °C for 90 minutes and a portion was frozen for later expression quantification by western blot. DNA cleavage reactions were performed at room temperature (approximately 23 °C) in a buffer containing 100 mM NaCl, 50 mM Tris-HCl Ph 7.5, 10 mM MgCl<sub>2</sub>, and 1 mM DTT. 225  $\mu$ l cleavage reactions were initiated by mixing the target DNA diluted in buffer with the appropriate combinations of ZFN expressing TnT lysate. Target DNA was at a final concentration of 1 ng /  $\mu$ l and each reaction contained 12% by volume of the appropriate TnT lysate mixtures. For 1X concentration reactions, this consisted of equal parts of lysate expressing the appropriate left ZFN and lysate expressing the appropriate right ZFN. For 1/2 X reactions, the ZFN lysate mixtures were diluted with an equal volume of blank lysate (TnT lysate containing methionine and ZnCl<sub>2</sub>, but lacking a template plasmid). Controls C3 and C4 contained 12% by volume of TnT lysate expressing only the left ZFN or the right ZFN respectively. At each timepoint 25  $\mu$ l of the remaining reaction was removed and added to pre-warmed tubes containing 5  $\mu$ l of 100 mM EDTA and incubated at 65 °C for 20 minutes in order to stop the cleavage reactions. Reactions were then treated with 0.5  $\mu$ l RNAase A (2.5  $\mu$ g/ $\mu$ l - epicentre) and incubated at 37 °C for 30 minutes. Reactions were further treated with 0.4  $\mu$ l Proteinase K (50  $\mu$ g/ml- epicenter), incubated at 37 °C for 60 minutes, centrifuged at 4400 rpm for 20 minutes and the 15  $\mu$ l of the supernatant was run on a 2% agarose e-gel (Thermo Scientific). Gels were visualized using a ChemiDoc XRS+ (Bio-Rad) and band intensities were quantified using Image J software (NIH). Calculated percent DNA cleavage vs. time was fit to a single order exponential allowing a time offset to account for mixing time and non-instantaneous reaction quenching. Microcal origin (originlab.com) was used for the non-linear curve fitting. Uncropped images of the gels from **Supplementary Figure 6** are shown below.

2% Agarose (GP)

M 1 2 3 4 5 6 7 8 9 10 11 12 13 14 15 16 17 18 19 20 21 22 23 24 M

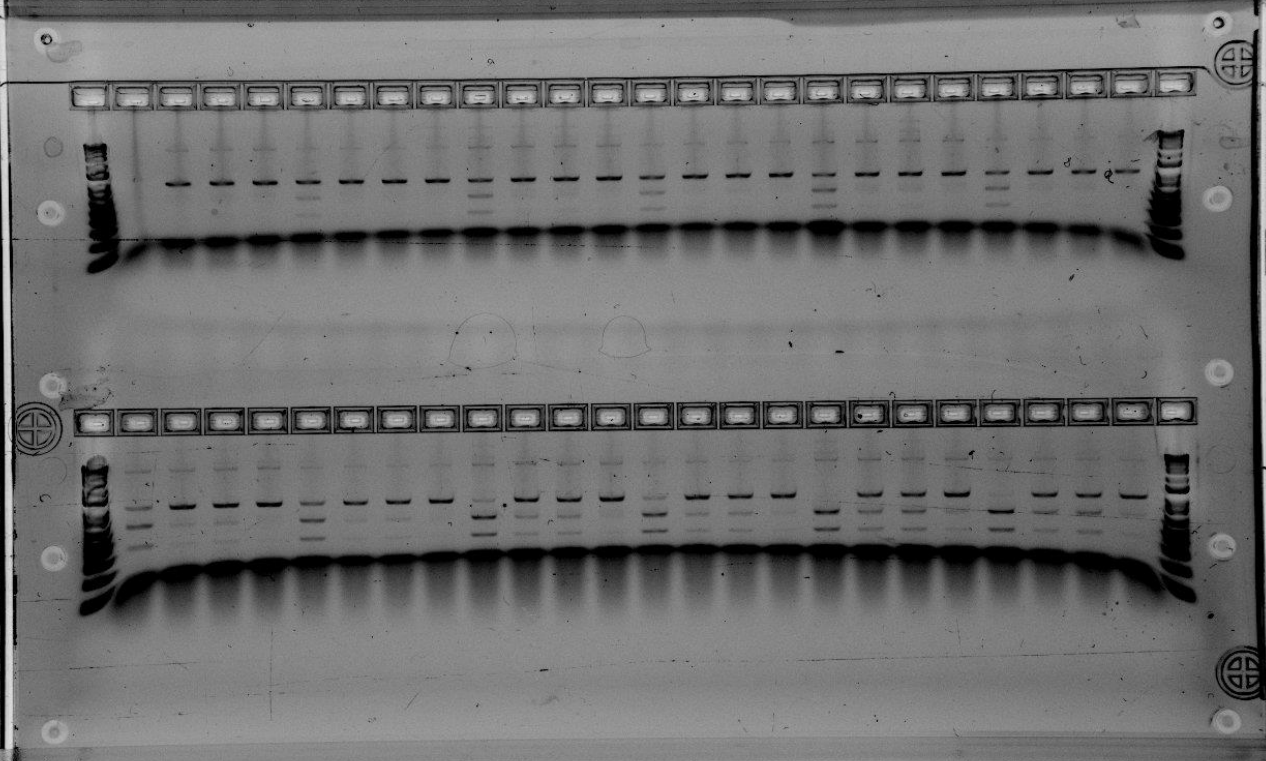

M 25 26 27 28 29 30 31 32 33 34 35 36 37 38 39 40 41 42 43 44 45 46 47 48 M

E-Gel<sup>®</sup> 48

u.s.p 5,865,974

invitrogen

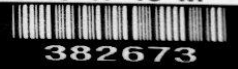

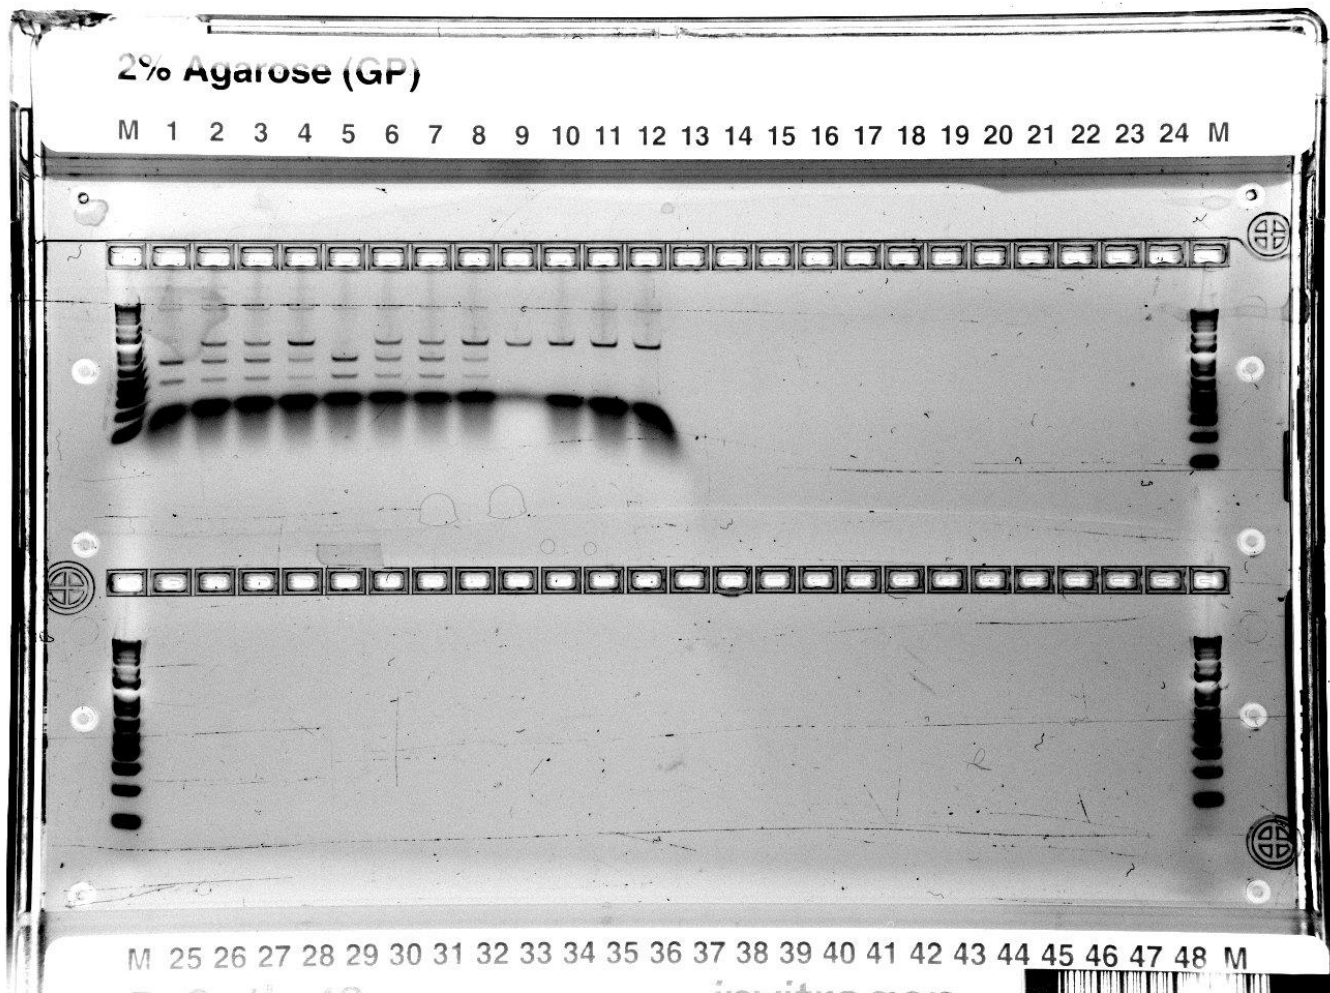

### Estimation of AAVS1 ZFN protein concentration in TNT lysates

The protein concentration of FLAG-tagged AAVS1 ZFNs expressed in TNT lysates was determined using anti-FLAG western blot and band density analysis. Known amounts of purified FLAG-tagged AAVS1 ZFN (20, 15, 10, 7.5, 5, 3.75, 2.5, or 1.25 ng respectively) were electrophoresed with diluted TnT lysates on 4-12% NuPAGE Bis-Tris Protein gels (Thermo Fisher, cat. # NP0323PK2) in 1X NuPAGE MOPS SDS buffer (Thermo Fisher). Proteins were transferred onto nitrocellulose membrane by wet transfer. The membrane was then blocked with 5% fat-free milk in TBS-T and incubated with 1 to 1000 dilution of an anti-FLAG-HRP conjugate (Sigma-Aldrich, cat. # A8592). After washing with TBS-T, the membrane was probed with ECL detection reagent (GE Lifesciences), and the images were captured and analyzed on Bio-rad's Chemidoc imager using Image Lab software (Bio-rad, v6.0.0). Band intensities were calculated, and a standard curve was plotted for the known amounts of the protein standard. Concentrations of the FLAG-tagged proteins from TNT lysates were obtained from the standard curves. Only images containing non-saturated pixels were used for this analysis. The uncropped image of the blot shown in **Supplementary Figure 6** is below.

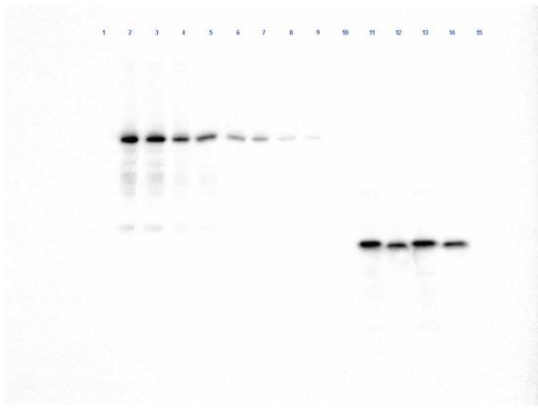

## GUIDE-seq oligo incorporation frequency analysis

Cells treated with ZFNs and the appropriate GUIDE-seq oligo were processed and sequenced with the same protocol used for the amplicon-based indel assay. GUIDE-seq oligos were always transfected at a concentration of 1  $\mu$ M. For the experiment shown in **Supplementary Figure 14**, 300 ng mRNA encoding the left AAVS1 ZFN and 300 ng mRNA encoding the right AAVS1 ZFN were used. For the experiment shown in **Supplementary Figure 15**, 400 ng mRNA encoding the appropriate left ZFN and 400 ng mRNA encoding the appropriate right ZFN was used. The percentage of integrated GUIDE-seq oligos was determined with a simple shell script that processed the fastq files for amplicons of the appropriate locus (either the AAVS1 ZFN target or the TCR $\alpha$  ZFN target) to count the total number of sequence reads in each file, count the number of sequence reads containing the sequence GTTTAATTGAGTTGTCATATGTTAATAACGGTAT on either DNA strand, and then calculate the percentage of sequence reads containing the full 34 bp oligo sequence.

## Custom computer scripts for indel analysis

Script to process indel data for the standard indel assay:

```
MiSeq_hybrid_indel_analysis.py
import string
import sys

indel_table_filename = sys.argv[1]
sample_name = indel_table_filename[:-20]
sample_info_filename = sample_name + 'sample_info.txt'
output_filename = sample_name + 'indel_analysis.txt'

indel_dict = {}

#this function takes an indel code and returns 1 if any of the individual indels in the code overlap the window
defined by window_start and window_end
def in_window(indel_code, window_start, window_end):
    is_in_window = 0
    indel_list = string.split(indel_code, ',')
    for indel in indel_list:
        data = string.split(indel, ':')
        indel_start = string.atoi(data[4])
        indel_end = string.atoi(data[5])
        if indel_start <= window_start and indel_end >= window_end:
            is_in_window = 1
        if indel_start >= window_start and indel_start <= window_end:
            is_in_window = 1
        if indel_end >= window_start and indel_end <= window_end:
            is_in_window = 1
    return is_in_window

data_file = open(indel_table_filename, 'r')
```

```

#reads in the appropriate all_indels.table to extract the indel information for each individual MiSeq sample
#note that the indel frequencies in this file are truncated floating point numbers and are ignored and
recalculated at the required precision later
for line in data_file:
    line = string.strip(line)
    if line[:6] != 'sample' and line[0] != '#':
        sample_name, simple_indelcode, ascii_count, ascii_frequency, flag, verbose_indelcode =
string.split(line, '\t')
        indelcode = string.strip(verbose_indelcode, '"')
        indelcode = string.strip(indelcode, '()')
        indelcode = string.strip(indelcode, ',')
        count = string.atoi(ascii_count)
        if indelcode not in indel_dict:
            indel_dict[indelcode] = []
        indel_dict[indelcode].append( (sample_name, count) )

output_file = open(output_filename, 'w')
output_line =
'name\t\treated\t%indels\treads\tindels\twindowed\tcorrected\tthybrid\tcontrol\t%indels\treads\tindels\twindowed\t
corrected\tthybrid\twindow_start\twindow_end\n'
output_file.write(output_line)

#reads in the sample file that includes a name, the filename containing the sequence reads for the nuclease
treated sample,
#the filename containing the sequence reads for the control sample, and the start and end of the indel window
with respect to the start of the amplicon
#the indel counts are calculated and output for all indels, windowed indels, background corrected indels, and
windowed + background corrected indels
sample_info_file = open(sample_info_filename, 'r')
for line in sample_info_file:
    line = string.strip(line)
    if line:
        print line
        pair_name, filename1, filename2, ascii_window_start, ascii_window_end = string.split(line)
        window_start = string.atoi(ascii_window_start)
        window_end = string.atoi(ascii_window_end)
        file1_total = 0
        file1_all_indels = 0
        file1_windowed_indels = 0
        file1_windowed_corrected_indels = 0
        file1_unwindowed_corrected_indels = 0
        file1_indel_dict = {}
        file2_total = 0
        file2_all_indels = 0
        file2_windowed_indels = 0
        file2_windowed_corrected_indels = 0
        file2_unwindowed_corrected_indels = 0
        file2_indel_dict = {}
        #this loop identifies and stores all indel data for the two samples being compared
        for indelcode in indel_dict.keys():
            for entry in indel_dict[indelcode]:
                if entry[0] == filename1:
                    file1_indel_dict[indelcode] = entry[1]
                    file1_total += entry[1]
                    if indelcode != 'wt': #wt indelcode indicates the lack of indels since the wild-type
amplicon is defined as containing no indels
                        file1_all_indels += entry[1]
                        if in_window(indelcode, window_start, window_end):
                            file1_windowed_indels += entry[1]
                if entry[0] == filename2:
                    file2_indel_dict[indelcode] = entry[1]
                    file2_total += entry[1]
                    if indelcode != 'wt':
                        file2_all_indels += entry[1]
                        if in_window(indelcode, window_start, window_end):
                            file2_windowed_indels += entry[1]
        #this loop compares indels, calculated indel frequencies, and performs the background correction
for indelcode in indel_dict.keys():
    if indelcode != 'wt':
        if indelcode in file1_indel_dict:
            file1_indelcode_count = file1_indel_dict[indelcode]
            file1_indelcode_frequency = float(file1_indel_dict[indelcode]) / float(file1_total)
        else:
            file1_indelcode_count = 0
            file1_indelcode_frequency = 0.0

        if indelcode in file2_indel_dict:
            file2_indelcode_count = file2_indel_dict[indelcode]
            file2_indelcode_frequency = float(file2_indel_dict[indelcode]) / float(file2_total)

```



```

else:
    file2_indelcode_count = 0
    file2_indelcode_frequency = 0.0
    #the indel value for the sample that has the lower frequency is assumed to be background and
discarded
    #the indel value for the sample that has the higher frequency is corrected by subtracting off
the frequency of that particular indel in the other sample
    #this corrected frequency is then turned back into an integer value and subtracted from the
observed count of that particular indel
    if file1_indelcode_frequency > file2_indelcode_frequency:
        correction = int(round(file2_indelcode_frequency * float(file1_total)))
        corrected = file1_indelcode_count - correction
        file1_unwindowed_corrected_indels += corrected
        if in_window(indelcode, window_start, window_end):
            file1_windowed_corrected_indels += corrected
    elif file2_indelcode_frequency > file1_indelcode_frequency:
        correction = int(round(file1_indelcode_frequency * float(file2_total)))
        corrected = file2_indelcode_count - correction
        file2_unwindowed_corrected_indels += corrected
        if in_window(indelcode, window_start, window_end):
            file2_windowed_corrected_indels += corrected
    if file1_total > 0 and file2_total > 0: #this condition catches situations where there is no data to
avoid a division by zero
        percent_indels1 = 100.0 * float(file1_windowed_corrected_indels) / float(file1_total)
        percent_indels2 = 100.0 * float(file2_windowed_corrected_indels) / float(file2_total)
        output_line = '%s\t%s\t%8.4f\t%d\t%d\t%d\t%d\t%s\t%8.4f\t%d\t%d\t%d\t%d\t%d\t%d\n'
%(pair_name, \
        filename1, percent_indels1, file1_total, file1_all_indels, file1_windowed_indels,
file1_unwindowed_corrected_indels, file1_windowed_corrected_indels, \
        filename2, percent_indels2, file2_total, file2_all_indels, file2_windowed_indels,
file2_unwindowed_corrected_indels, file2_windowed_corrected_indels, \
        window_start,
window_end)
    else:
        output_line = '%s\t%s\tND\tND\tND\tND\tND\tND\t%s\tND\tND\tND\tND\tND\tND\t%s\t%s\n' %(pair_name,
filename1, filename2, window_start, window_end)
        output_file.write(output_line)
output_file.close()
data_file.close()
sample_info_file.close()

```

Script to generate p-values as per Pattanayak et al. and apply multiple testing correction. Requires various external modules and indelstats.py. The relevant portion of indelstats.py is included.

#### hybrid\_indel\_pval\_fdr.py

```

import math
import scipy.stats as stats
import statsmodels.api as sm
import pandas as pd
import numpy as np
import string
import os,sys
import indelstats

sample_num = 1
data_filename = sys.argv[1]
data_file = open(data_filename , 'r')
pvals = []
output_list = []
output_file_name = data_filename[:-4] + '_fdr_pvals.txt'
output_file = open(output_file_name, 'w')
for line in data_file:
    line = string.strip(line)
    if line:
        data = string.split(line)
        sample_num = data[0]
        sample_name = data[1]
        treated_hits = string.atoi(data[7])
        control_hits = string.atoi(data[14])
        treated_total = string.atoi(data[3])
        control_total = string.atoi(data[10])
        p_val = indelstats.binom_pval(treated_hits, control_hits, treated_total, control_total)
        if p_val is None:
            p_val = 1.0 #None value indicates no indels in either sample; None value will cause issues with
multipletests correction
        pvals.append(p_val)

```

```

        output_line = '%s\t%s\t%d\t%d\t%d\t%10.8f' %(sample_num, sample_name, treated_hits, control_hits,
        treated_total, control_total, p_val)
        output_list.append(output_line)
results = sm.stats.multipletests(pvals, alpha=0.05, method='fdr_bh')
corrected_pvals = results[1]
output_line = 'sample\ttreated_indels\tcontrol_indels\ttreated_total\tcontrol_total\tpval\tfdr_pval\n'
output_file.write(output_line)
for pos in range(len(output_list)):
    output_line = '%s\t%10.8f\n' %(output_list[pos], corrected_pvals[pos])
    output_file.write(output_line)
output_file.close()
data_file.close()

```

indelstats.py (relevant portion only)

```

import math
import scipy.stats as stats
import statsmodels.api as sm
import pandas as pd
import numpy as np
'''
Test for binomial distribution differences as described in
http://www.ncbi.nlm.nih.gov/pmc/articles/PMC3164905/#SD1
Nat Methods. 2011 Aug 7;8(9):765-70. doi: 10.1038/nmeth.1670.
Revealing off-target cleavage specificities of zinc-finger nucleases by in
vitro selection.
Pattanayak V1, Ramirez CL, Joung JK, Liu DR

```

"In Supplementary Tables S3 and S6, P-values were calculated for a one-sided test of the difference in the proportions of sequences with insertions or deletions from the active ZFN sample and the empty vector control samples. The t-statistic was calculated as  $t = (p_{\text{hat1}} - p_{\text{hat2}}) / \sqrt{(p_{\text{hat1}} (1 - p_{\text{hat1}}) / n1) + (p_{\text{hat2}} (1 - p_{\text{hat2}}) / n2)}$ , where  $p_{\text{hat1}}$  and  $n1$  are the proportion and total number, respectively, of sequences from the active sample and  $p_{\text{hat2}}$  and  $n2$  are the proportion and total number, respectively, of sequences from the empty vector control sample."

```

'''
def binom_pval(tr_hits,con_hits,tr_total,con_total):
    ''' Note this is a one-sided test, you cannot switch the treated and
    control order. It is testing whether the treated is higher than the
    control. '''
    assert isinstance(tr_hits, int)
    assert isinstance(con_hits, int)
    if tr_hits == 0 and con_hits == 0:
        return None
    n1 = float(tr_total)
    n2 = float(con_total)
    total = n1 + n2
    p_hat1 = tr_hits / n1
    p_hat2 = con_hits / n2
    t = (p_hat1 - p_hat2) / math.sqrt((p_hat1 * (1 - p_hat1) / n1) + (p_hat2 * (1 - p_hat2) / n2))
    # pval = 1-stats.t.pdf(t,df=total)
    pval = 1- stats.t.cdf(t,total)
    return pval

```

## Script to perform high sensitivity indel assay using oversampling and technical replicates

```

import string
import sys

def _ss(data):
    """Return sum of square deviations of sequence data."""
    c = mean(data)
    ss = sum((x-c)**2 for x in data)
    return ss

def stdev(data, ddof=0): #code from online example of calculating standard deviation in python
    """Calculates the population standard deviation
    by default; specify ddof=1 to compute the sample
    standard deviation."""
    n = len(data)
    if n < 2:
        raise ValueError('variance requires at least two data points')
    ss = _ss(data)
    pvar = ss / (n-ddof)
    return pvar**0.5

```

```

def mean(input_list):
    total = 0.0
    for item in input_list:
        total += item
    if len(input_list):
        return float(total) / float(len(input_list))
    else:
        return 0.0

def in_window(indel_code, window_start, window_end):
    is_in_window = 0
    indel_list = string.split(indel_code, ',')
    for indel in indel_list:
        data = string.split(indel, ':')
        indel_start = string.atoi(data[4])
        indel_end = string.atoi(data[5])
        if indel_start <= window_start and indel_end >= window_end:
            is_in_window = 1
        if indel_start >= window_start and indel_start <= window_end:
            is_in_window = 1
        if indel_end >= window_start and indel_end <= window_end:
            is_in_window = 1
    return is_in_window

input_filename = sys.argv[1]
output_filename = input_filename[:-4] + '.indel_analysis.txt'
input_file = open(input_filename, 'r')
output_file = open(output_filename, 'w')
total_replicates = 0
indel_dict = {}
total_counts = {}
ZFN_percent_indel_list = []
GFP_percent_indel_list = []
ZFN_unique_events = 0
GFP_unique_events = 0
sample_list = []
background_sample_list = []
sample_dict = {}
sample_num_dict = {}
sample_dict_file = open(input_filename, 'r')

#reads in config / sample list file
for line in sample_dict_file:
    line = string.strip(line)
    if line:
        if line[0] == '#':
            parameter, value = string.split(line)
            if parameter == '#all_indels_table':
                indel_table_filename = value
            if parameter == '#sigma_threshold':
                background_sigma_threshold = string.atof(value)
            if parameter == '#expected_fraction_threshold':
                read_threshold_expected_fraction = string.atof(value)
            if parameter == '#window_start':
                window_start = string.atoi(value)
            if parameter == '#window_end':
                window_end = string.atoi(value)
            if parameter == '#genomes_sampled':
                genomes_sampled = string.atoi(value)
        else:
            total_replicates += 1
            ascii_sample_num, sample_name, sample_status = string.split(line)
            sample_num = string.atoi(ascii_sample_num)
            sample_dict[sample_name] = sample_num
            sample_num_dict[sample_num] = sample_name
            sample_list.append(sample_num)
            if sample_status == 'background':
                background_sample_list.append(sample_num)
            total_counts[sample_num] = 0

data_file = open(indel_table_filename, 'r')

#reads info from all indels table
for line in data_file:
    line = string.strip(line)
    if line[:6] != 'sample' and line[0] != '#':

```

```

sample_name, simple_indelcode, ascii_count, ascii_frequency, flag, verbose_indelcode =
string.split(line, '\t')
indelcode = string.strip(verbose_indelcode, '"')
indelcode = string.strip(indelcode, '()')
indelcode = string.strip(indelcode, ',')
if sample_name in sample_dict:
    sample_num = sample_dict[sample_name]
    if sample_num in sample_list:
        count = string.atoi(ascii_count)
        total_counts[sample_num] += count
        frequency = string.atof(ascii_frequency)
        if indelcode not in indel_dict:
            indel_dict[indelcode] = []
        indel_dict[indelcode].append( (sample_num, count, frequency) )

background_frequency_list = {}
for indelcode in indel_dict.keys():
    background_frequency_list[indelcode] = []
    for sample_num in background_sample_list:
        for entry in indel_dict[indelcode]:
            if entry[0] == sample_num:
                count = entry[1]
                frequency = (float(count + 1) / float(total_counts[sample_num]))
                background_frequency_list[indelcode].append(frequency)

for sample_num in sample_list:
    total = 0
    indels = 0
    indeltype_count = 0
    for indelcode in indel_dict.keys():
        for entry in indel_dict[indelcode]:
            if entry[0] == sample_num:
                total += entry[1]
    read_threshold = read_threshold_expected_fraction * float(total) / float(genomes_sampled)
    indel_string = ''
    for indelcode in indel_dict.keys():
        for entry in indel_dict[indelcode]:
            if entry[0] == sample_num:
                if indelcode != 'wt':
                    if in_window(indelcode, window_start, window_end):
                        if entry[1] >= read_threshold:
                            average_background_frequency = mean(background_frequency_list[indelcode])
                            if len(background_frequency_list[indelcode]) >= 2:
                                stdev_background_frequency = stdev(background_frequency_list[indelcode], 1)
                            else:
                                stdev_background_frequency = 0.0
                            if (float(entry[1]) / float(total_counts[sample_num])) >
                                (average_background_frequency + stdev_background_frequency * background_sigma_threshold):
                                correction = int(average_background_frequency * float(total_counts[sample_num]))
                                indels += (entry[1] - correction)
                                indeltype_count += 1
                                indel_string += '%s %d %d; ' %(string.strip(indelcode), entry[1], correction)

    if total > 0:
        percent_indels = 100.0 * float(indels) / float(total)
    else:
        percent_indels = 0.0
    if sample_num not in background_sample_list:
        output_line = '%d\t%8.5f\t%d\t%d\t%d\t%s\t%s\n' %(sample_num, percent_indels, indels, total,
            indeltype_count, sample_num_dict[sample_num], indel_string)
        summary_line = '%d\t%8.5f\t%d\t%d\t%d\t%s' %(sample_num, percent_indels, indels, total, indeltype_count,
            sample_num_dict[sample_num])
        print summary_line
        output_file.write(output_line)

```

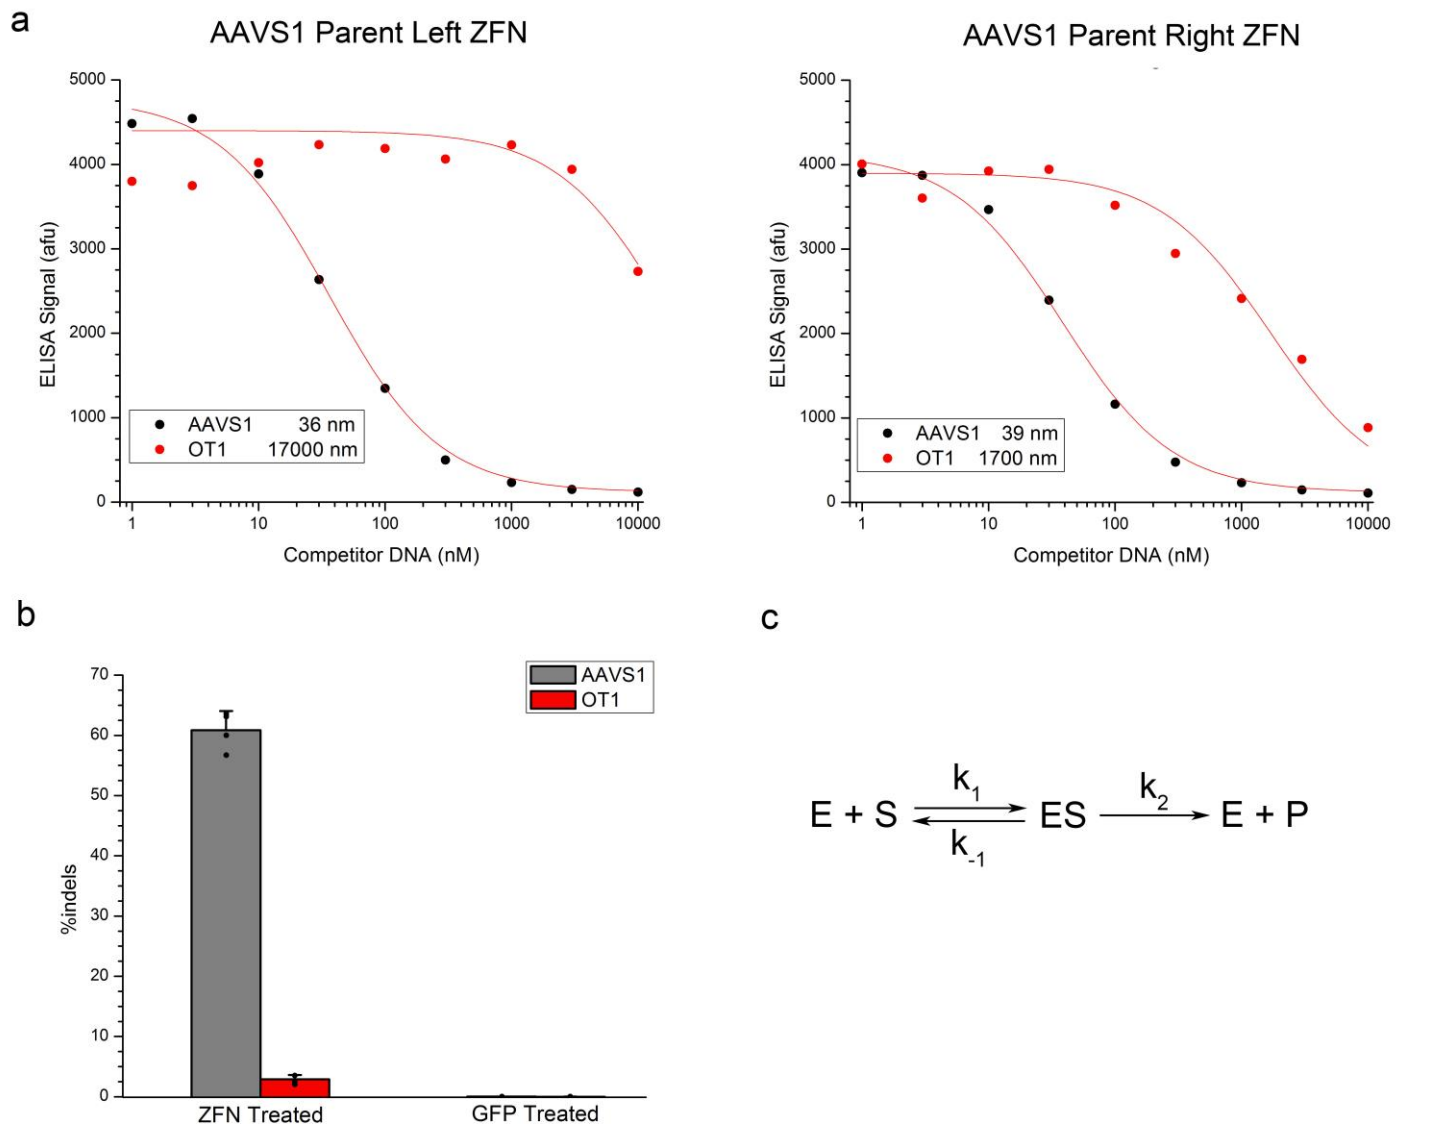

## Supplementary Figure 1

### Discordance between ZFN specificity as gauged via binding analysis and cellular cleavage studies

(a) Relative selectivity for on-target vs. off-target sites for the AAVS1 ZFNs<sup>42</sup> as gauged by ELISA-based competitive DNA binding assay. Data points are the average of two replicates. Insert values indicate target concentrations yielding 50% inhibition of binding to the intended site. The left ZFN shows a 472-fold preference for the intended target site vs. the OT1 off-target site while the right ZFN shows a 43.6-fold preference for the intended target site vs. the OT1 off-target site. Since both ZFNs must bind DNA in order for cleavage to occur, the total preference for complex formation at the intended target vs OT1 will be approximately 20,000-fold under non-saturating conditions. (b) Activity at the intended AAVS1 target and the OT1 off-target measured in human K562 cells. The mean of four independent measurements is shown and error bars represent standard deviations. Individual data points are the “parent full-dose” data points of the “ON” and “OT1” targets at the top of **Supplementary Table 5**. The cellular cleavage preference for the AAVS1 on-target vs. OT1 as gauged via indel analysis is approximately 21-fold. (c) Michaelis Menten framework for enzyme function (*Biochemische Zeitschrift*, Michaelis & Menten, 1913).  $k_1$  is the rate constant for binding of enzyme (E) to substrate (S),  $k_{-1}$  is the rate at which enzyme-substrate complex (ES) dissociates into unbound enzyme and substrate, and  $k_2$  is the rate at which the enzyme-substrate complex is converted into unbound enzyme and product (P). In this case the substrate is uncleaved genomic DNA, the product is the cleaved genomic DNA, and the enzyme is the pair of zinc finger nucleases.

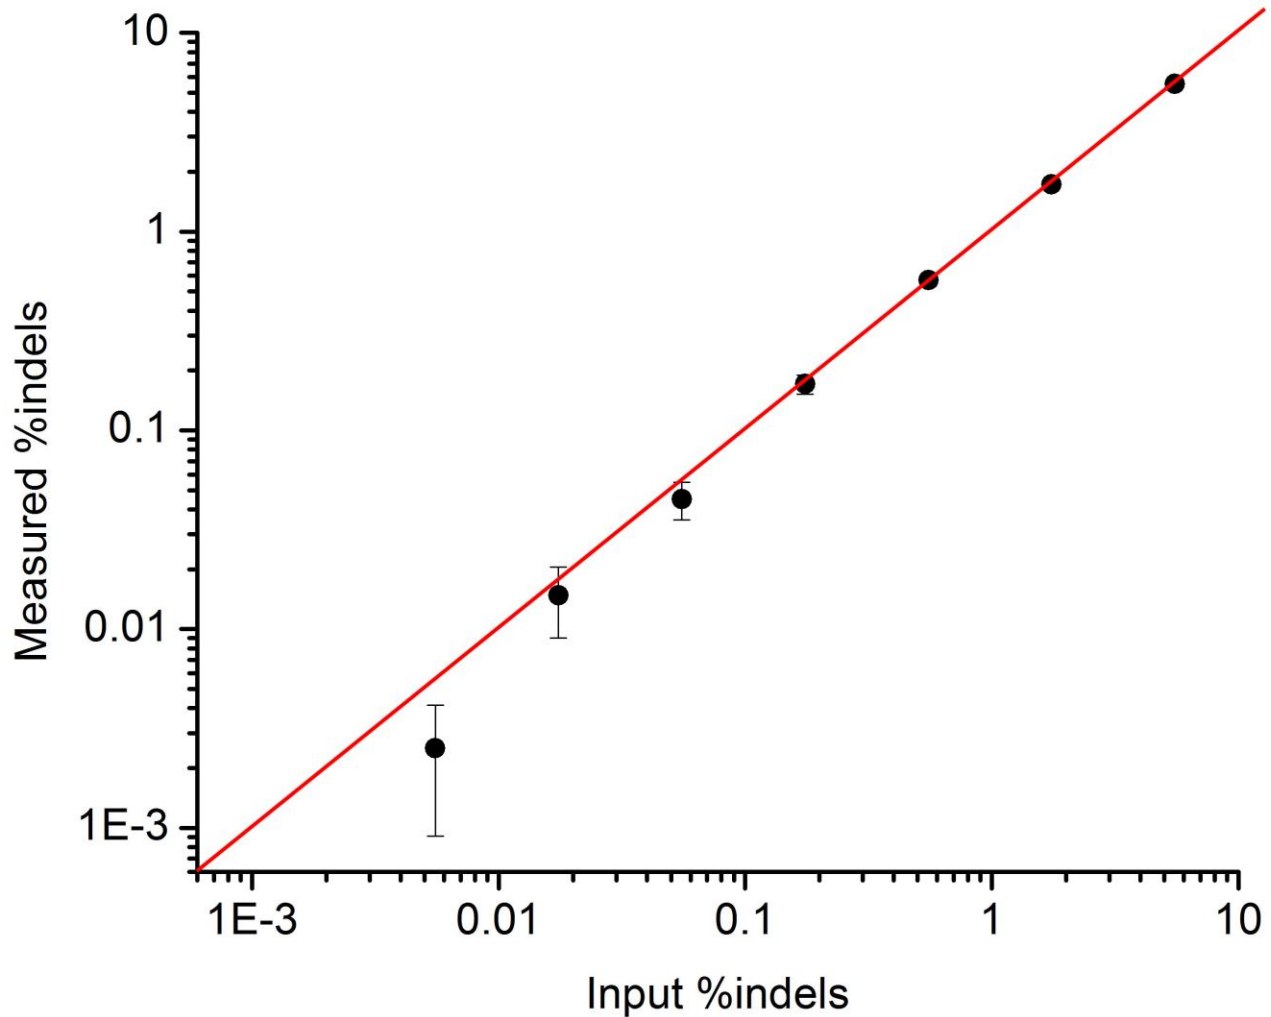

### Supplementary Figure 2

#### Linearity of the oversampling-based indel assay

The %indels at OT1 measured in a 3-fold dilution series is shown. The highest data point was derived from genomic DNA from K562 cells treated with the AAVS1 parent ZFNs and yields an average signal of 5.53% indels; the same sample quantified via standard deep-sequencing analysis yields a value of 6.14% indels. Subsequent samples were generated by serial dilution of the ZFN treated genomic DNA with genomic DNA from control K562 cells. Each value represents the average of 12 technical replicates, with an average of 529,000 sequence reads per replicate. Error bars indicate the 95% confidence interval. Values predicted from perfect linearity are shown by the red line.

| %indel values from each Q481A replicate |        |        |        |        |        |
|-----------------------------------------|--------|--------|--------|--------|--------|
| 0.0000                                  | 0.0199 | 0.0000 | 0.0000 | 0.0063 | 0.0012 |
| 0.0025                                  | 0.0015 | 0.0000 | 0.0000 | 0.0000 | 0.0065 |
| 0.0094                                  | 0.0000 | 0.0000 | 0.0000 | 0.0000 | 0.0000 |
| 0.0000                                  | 0.0000 | 0.0000 | 0.0039 | 0.0000 | 0.0064 |
| 0.0069                                  | 0.0000 | 0.0000 | 0.0000 | 0.0000 | 0.0000 |
| 0.0050                                  | 0.0133 | 0.0079 | 0.0111 | 0.0063 | 0.0000 |
| 0.0000                                  | 0.0000 | 0.0038 | 0.0000 | 0.0000 | 0.0000 |
| 0.0000                                  | 0.0008 | 0.0000 | 0.0012 | 0.0000 | 0.0000 |

| %indel values from each GFP replicate |        |        |        |        |        |
|---------------------------------------|--------|--------|--------|--------|--------|
| 0.0000                                | 0.0000 | 0.0000 | 0.0000 | 0.0000 | 0.0000 |
| 0.0000                                | 0.0000 | 0.0000 | 0.0000 | 0.0000 | 0.0000 |
| 0.0000                                | 0.0000 | 0.0000 | 0.0000 | 0.0000 | 0.0000 |
| 0.0000                                | 0.0000 | 0.0000 | 0.0000 | 0.0000 | 0.0000 |
| 0.0000                                | 0.0000 | 0.0000 | 0.0000 | 0.0000 | 0.0000 |
| 0.0000                                | 0.0000 | 0.0000 | 0.0000 | 0.0000 | 0.0000 |
| 0.0000                                | 0.0000 | 0.0000 | 0.0000 | 0.0000 | 0.0000 |
| 0.0000                                | 0.0000 | 0.0021 | 0.0000 | 0.0000 | 0.0000 |
| 0.0000                                | 0.0000 | 0.0000 | 0.0000 | 0.0000 | 0.0000 |

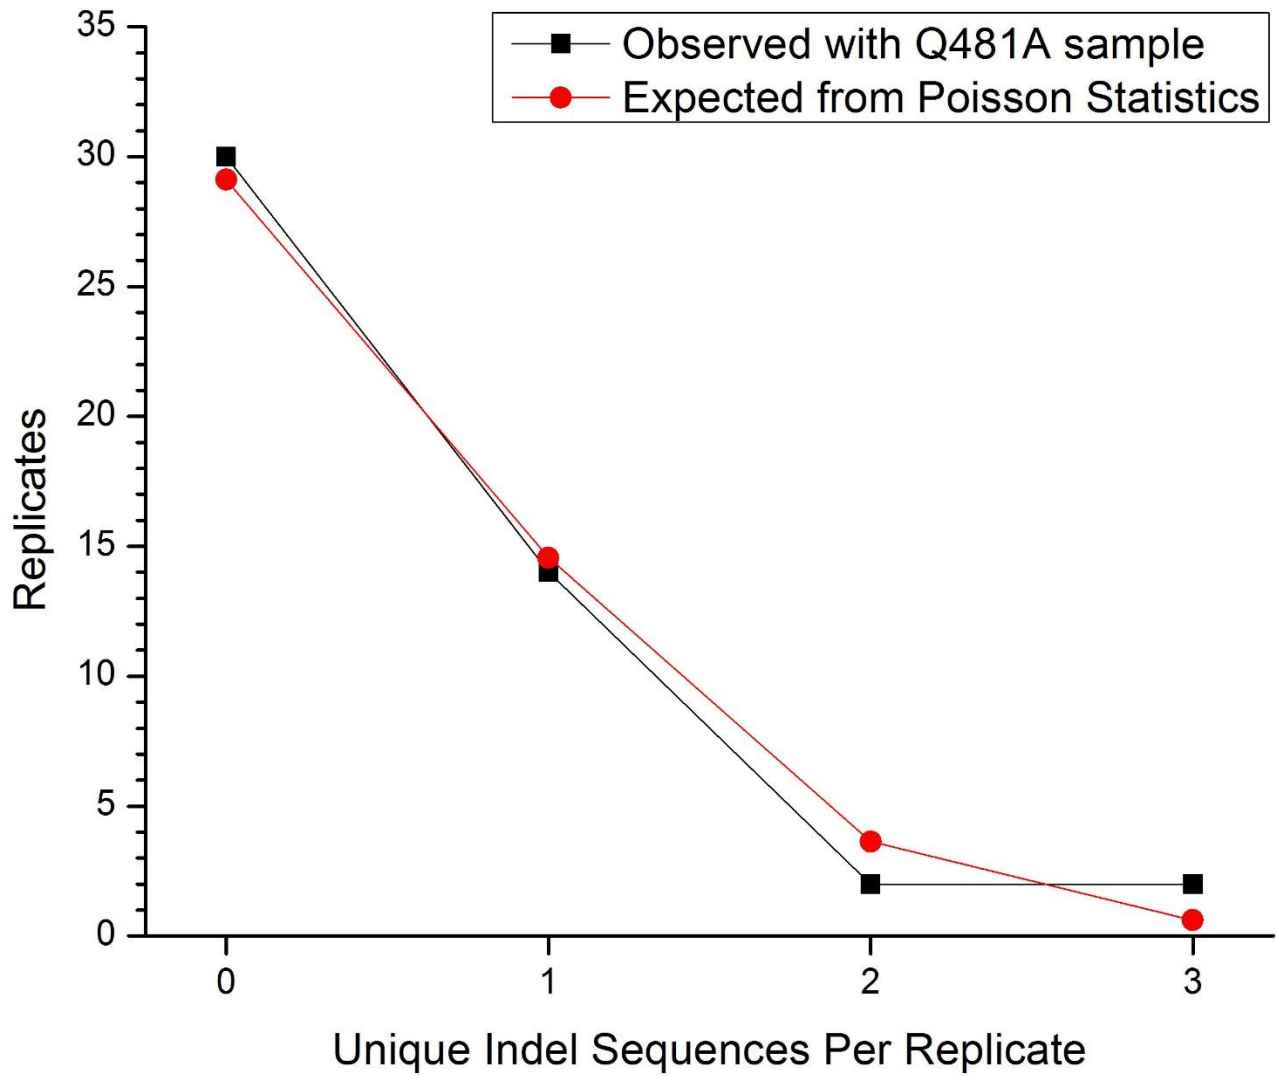

Supplementary Figure 3

#### **Data underlying OT1 activity for Q481A and GFP shown in Figure 2d**

%indel values for 48 individual technical replicates are shown in the upper panel. The large number of technical replicates were performed in order to sample a sufficient number of genomes for each sample. The Q481A data is significantly different than the GFP data ( $P=0.00014$ , one-tailed T-test). The average %indels for the Q481A sample were 0.0024%; simulations with this data indicated %indel values above 0.0005% would likely be significantly different from the GFP samples implying a sensitivity of less than 0.001% indels. For the Q481A sample, 30 of the replicates were negative for indel activity, 14 replicates had one unique indel sequence, 2 replicates had two unique indel sequences, and 2 replicates had 3 unique indel sequences. This distribution is a good match for the distribution predicted by Poisson statistics with a frequency of 0.5 (lower panel) and implies that the assay is accurately measuring indels in individual input alleles. 24 unique events observed in 1.44 million input alleles yields an expected %indels of 0.0017% which is within the 95% confidence interval of the observed 0.0024% indels. More detailed information for these samples can be found in **Supplementary Table 21**.



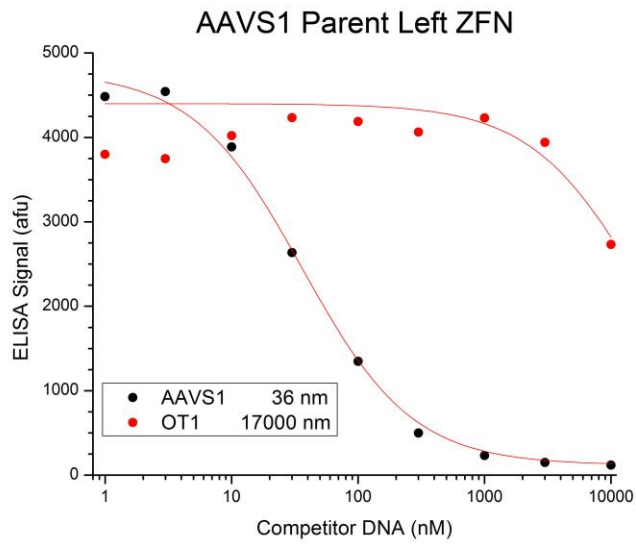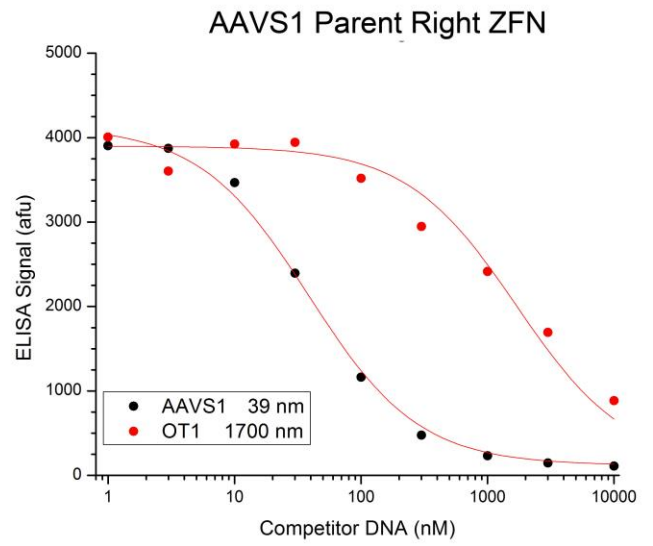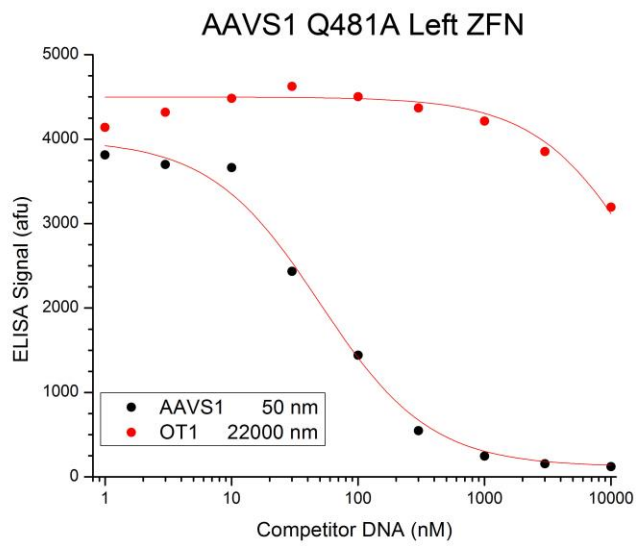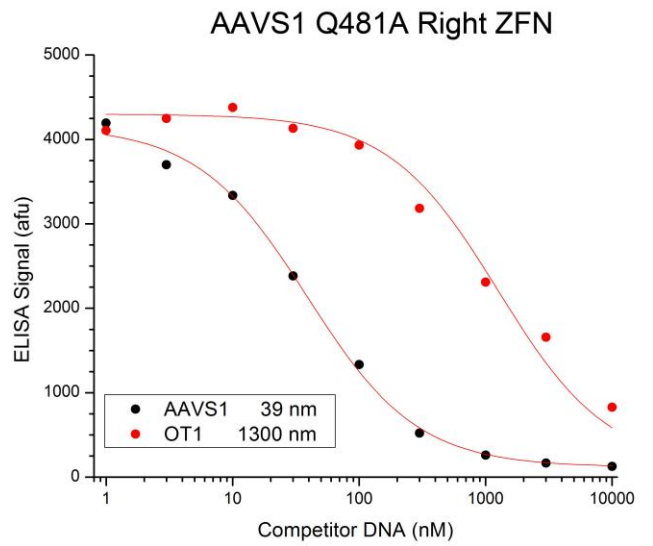

**Supplementary Figure 4**

**Relative selectivity for on-target vs. off-target sites for the AAVS1 parent ZFNs and their Q481A variants**

For an experimental overview see **Supplementary Figure 1a**. The top two panels are also shown in **Supplementary Figure 1a**. Data points are the average of two replicates. This experiment was performed twice and a representative result is shown.

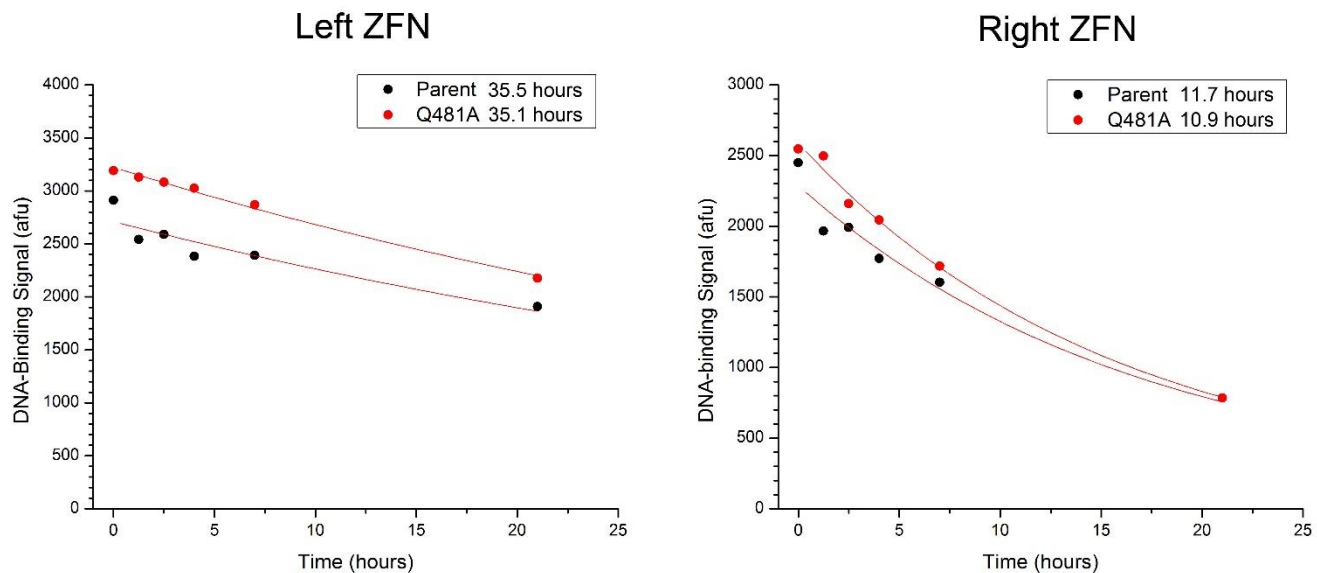

**Supplementary Figure 5**

**Dissociation rate measurements for interaction of the parent and Q481A ZFNs with the on-target site**

Data points represent the average of two replicates. Half-lives for each construct bound to its intended target are shown. Assay was performed by pre-binding of ZFNs to a biotinylated target and then chasing with a 100-fold excess of non-biotinylated target DNA. This assay was performed essentially as described for the study in **Supplementary Figure 1a**, except for the timing of addition of competitor DNA and the timing of the assay readouts. This experiment was performed three times and a representative study is shown.

| Dimer Type                  | Dimer Sketch | Dimer Name | $t_{1/2}$ (min) | $k_{obs}$ ( $s^{-1}$ ) | $t_{1/2}$ (min) half dose | $k_{obs}$ ( $s^{-1}$ ) half dose |
|-----------------------------|--------------|------------|-----------------|------------------------|---------------------------|----------------------------------|
| parent dimer                |              | +/+        | 6               | $2.0 \times 10^{-3}$   | 6                         | $2.0 \times 10^{-3}$             |
| mixed dimers                |              | + / A      | 57              | $2.0 \times 10^{-4}$   | 60                        | $1.9 \times 10^{-4}$             |
|                             |              | A / +      | 50              | $2.3 \times 10^{-4}$   | 50                        | $2.3 \times 10^{-4}$             |
| Q481A / Q481A variant dimer |              | A / A      | 128             | $9.1 \times 10^{-5}$   | ND                        | ND                               |

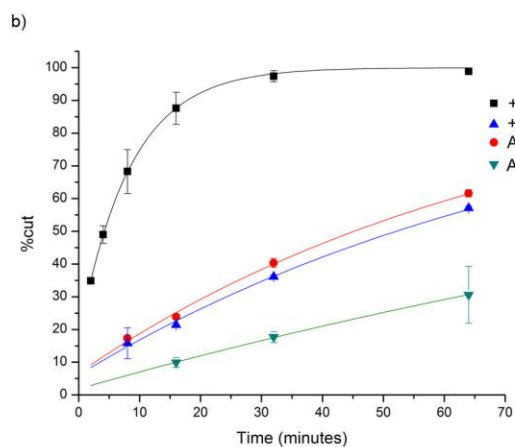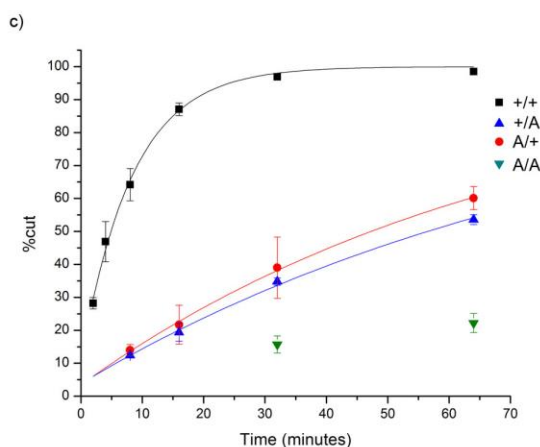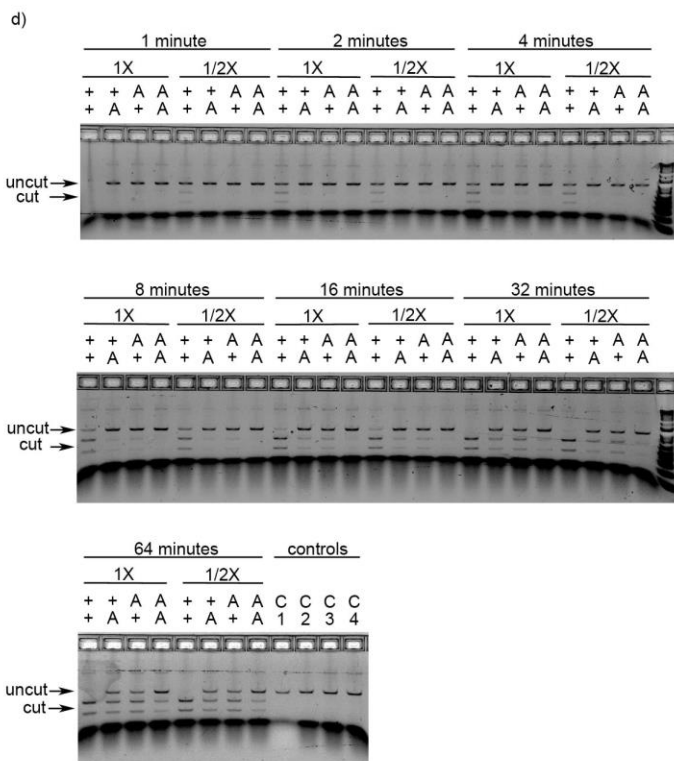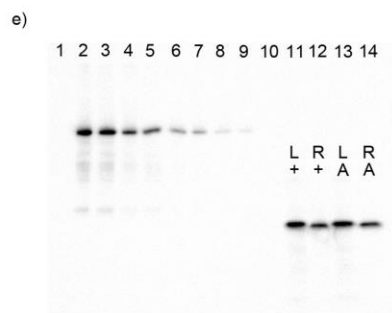

## Supplementary Figure 6

### Comparison of DNA cleavage rates for ZFNs bearing either the parent FokI domain or the Q481A variants

**a)** Assay overview: parental ZFNs or Q481A variants were expressed from plasmid templates using a coupled transcription-translation kit (Promega) and then combined to form all four possible dimer species. Dimers were then mixed with a 1 kb cleavage substrate bearing a single ZFN dimer target and incubated at room temperature for the indicated reaction times, followed by stopping of reactions and analysis by gel electrophoresis. The experiment was performed with two different doses of ZFN dimers and the entire experiment was repeated twice and the results from each replicate were averaged. Half-lives ( $t_{1/2}$ ) and apparent rate constants ( $k_{obs}$ ) determined for all four dimers at both doses are shown. Note that as hosts for this study, four-finger derivatives of our AAVS1 ZFNs were used, which were truncated to remove the two FokI-distal fingers. These hosts were chosen because they exhibited faster complex formation, relative to their six-finger counterparts, which enables discernment of a wider range of apparent  $k_{obs}$  values. For additional detail see **Supplementary Discussion**.

**b)** Plot of percent cleavage of target DNA at each timepoint for the samples treated with the full dose of ZFNs. Data points are the average of two independent replicates and error bars represent standard deviations. Time points for each sample were fit with the indicated single order exponentials.

**c)** Plot of percent cleavage of target DNA at each timepoint for the samples treated with the half dose of ZFNs and are also the average of two independent replicates. Plots are formatted as in panel **b** and error bars represent standard deviations.

**d)** Gel image. Arrows indicate the position of the full-length target DNA (labeled "uncut") and the position of the two cleaved products (labeled 'cut'). DNA cleavage was monitored at the indicated timepoints (note that the first sample for the first timepoint failed). Samples labeled "1/2X" contain half the ZFN extract dose of samples labeled "1X". Dimer combinations are labeled as in panel **a**. Negative controls C1, C2, C3, and C4 are as follows: C1 contains target site only, C2 contains blank transcription-translation lysate and target site, C3 contains lysate expressing only the left parental ZFN plus target site, and C4 contains lysate expressing only the right parental ZFN plus target site. Plasmid template from the coupled-transcription translation reaction is visible as a faint band above the uncut target DNA. The dark smear below the lower cut target DNA band is predominantly material from the coupled transcription-translation lysate as indicated by its reduction in control C1. This experiment was performed twice with one repetition shown.

**e)** Expression analysis of ZFNs by anti-FLAG western blot. Lanes 2-9 contain different dilutions of a purified standard while lanes 11-14 contain TnT lysate expressing the indicated ZFN variant (L+ and R+ are left and right parental ZFNs while LA and RA are left and right Q481A ZFN variants). This analysis was performed once for each of the two independent replicates and similar results were obtained for both independent replicates. Expression levels for replicate #1 L+, R+, LA, and RA are 634 nM, 448 nM, 618 nM, and 380 nM respectively while expression levels for replicate #2 L+, R+, LA, and RA are 578 nM, 412 nM, 562 nM, and 400 nM respectively. Overall there is an approximately 50% higher expression of the left ZFNs vs. the right ZFNs (an average of 598 nM vs. 410 nM in undiluted lysate). Expression levels of parental vs. Q481 versions of the same nuclease are more similar with an average concentration of parental ZFNs of 518 nM and an average concentration of Q481A ZFNs of 490 nM. The concentration of the lower expressing right ZFNs was approximately 15-fold more concentrated than the target DNA in the full dose samples.

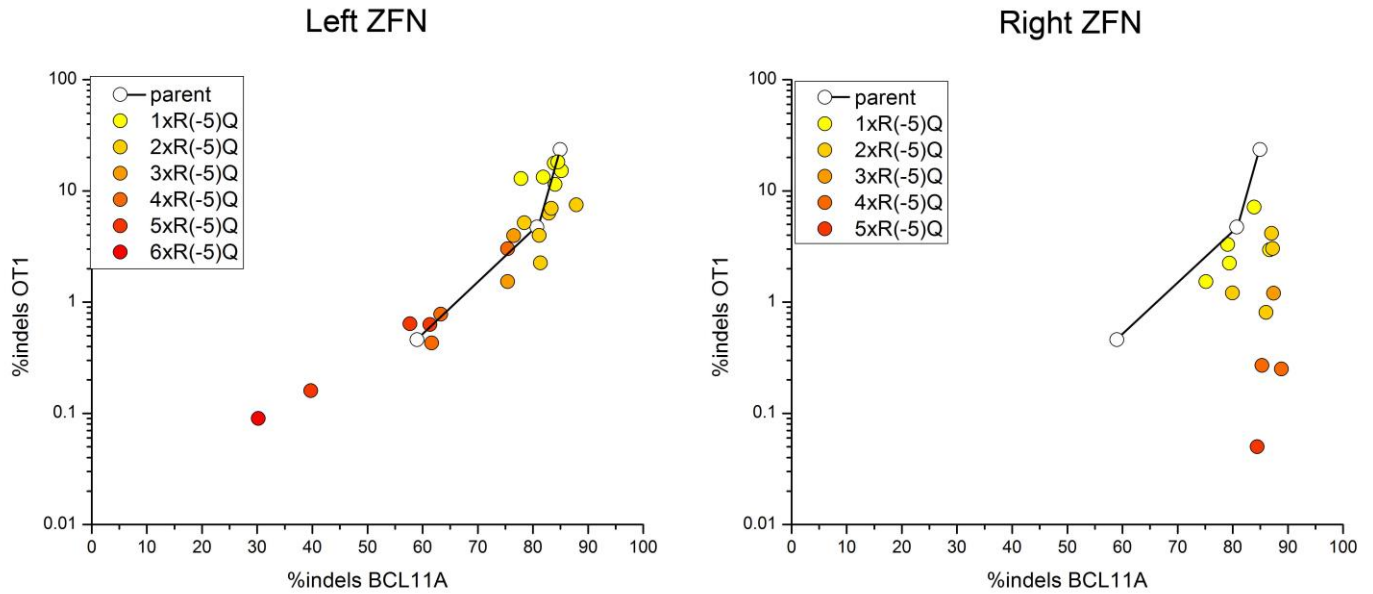

### Supplementary Figure 7

#### Comparison of behaviors of ZFP backbone variants in the context of the left and right BCL11A ZFNs

Left panel: plot of % indels at the on-target vs. off-target for all substitution variants of the left ZFN at the 400ng dose. Colored circles indicate substitution levels of the ZFN variant associated with each data point (values are from **Supplementary Table 13**). White circles connected by a black line indicate results obtained with a dilution series of the parent, unmodified ZFN (sample 1 in **Supplementary Table 13**). It can be seen that increasing levels of R(-5)Q substitutions yield very similar behavior in the ratio of on:off-target cleavage as dilution of the parent dimer. Right panel: plot of % indels at the on-target vs. off-target for all substitution variants of the right ZFN at the 200ng dose. For this ZFN, increasing levels of R(-5)Q substitutions yield a selective reduction in off-target cleavage without loss of on-target activity.

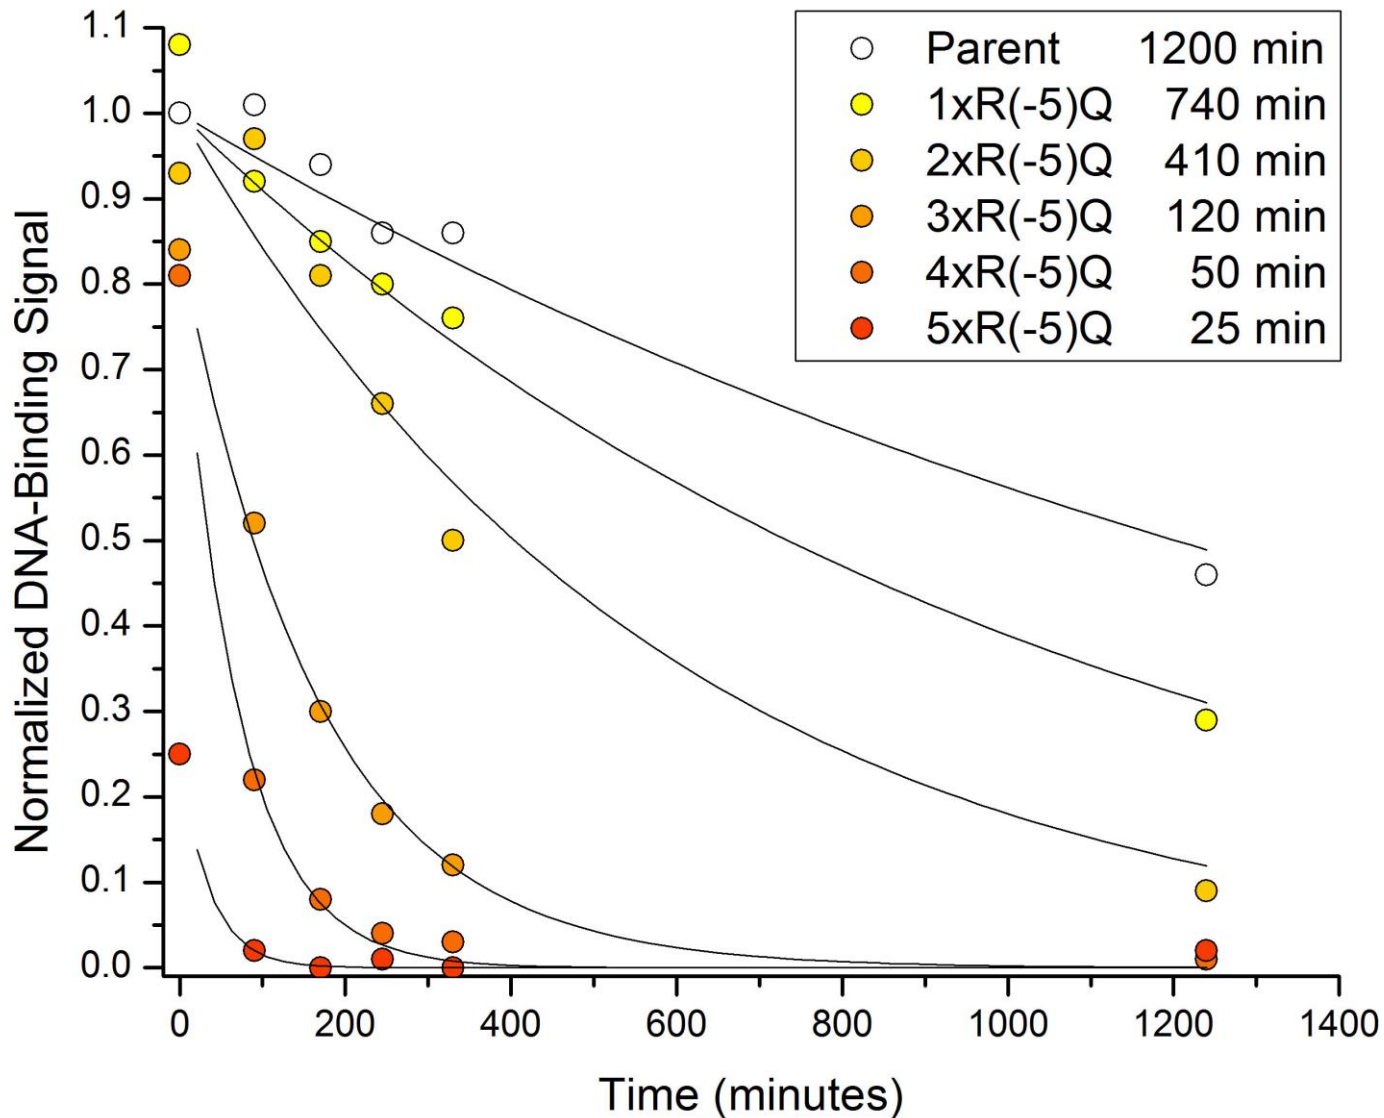

**Supplementary Figure 8**

**Dissociation rate measurements for interaction of the BCL11A right ZFN bearing the indicated number of R(-5)Q mutations with the on-target site**

Assay was performed by pre-binding of ZFNs to a biotinylated target and then chasing with a 100-fold excess of non-biotinylated target DNA. Signal was background subtracted and normalized to the value obtained without the unlabeled chase. Constructs are described as in the right panel of **Supplementary Figure 7**. Half-lives for each construct are shown in the figure legend. A second study of R(-5)Q substitutions of the BCL11A left ZFN yielded similar results. Values are single replicates from a single study. A preliminary experiment that tested the parents and the fully substituted variants of both the left and right ZFNs yielded similar results.

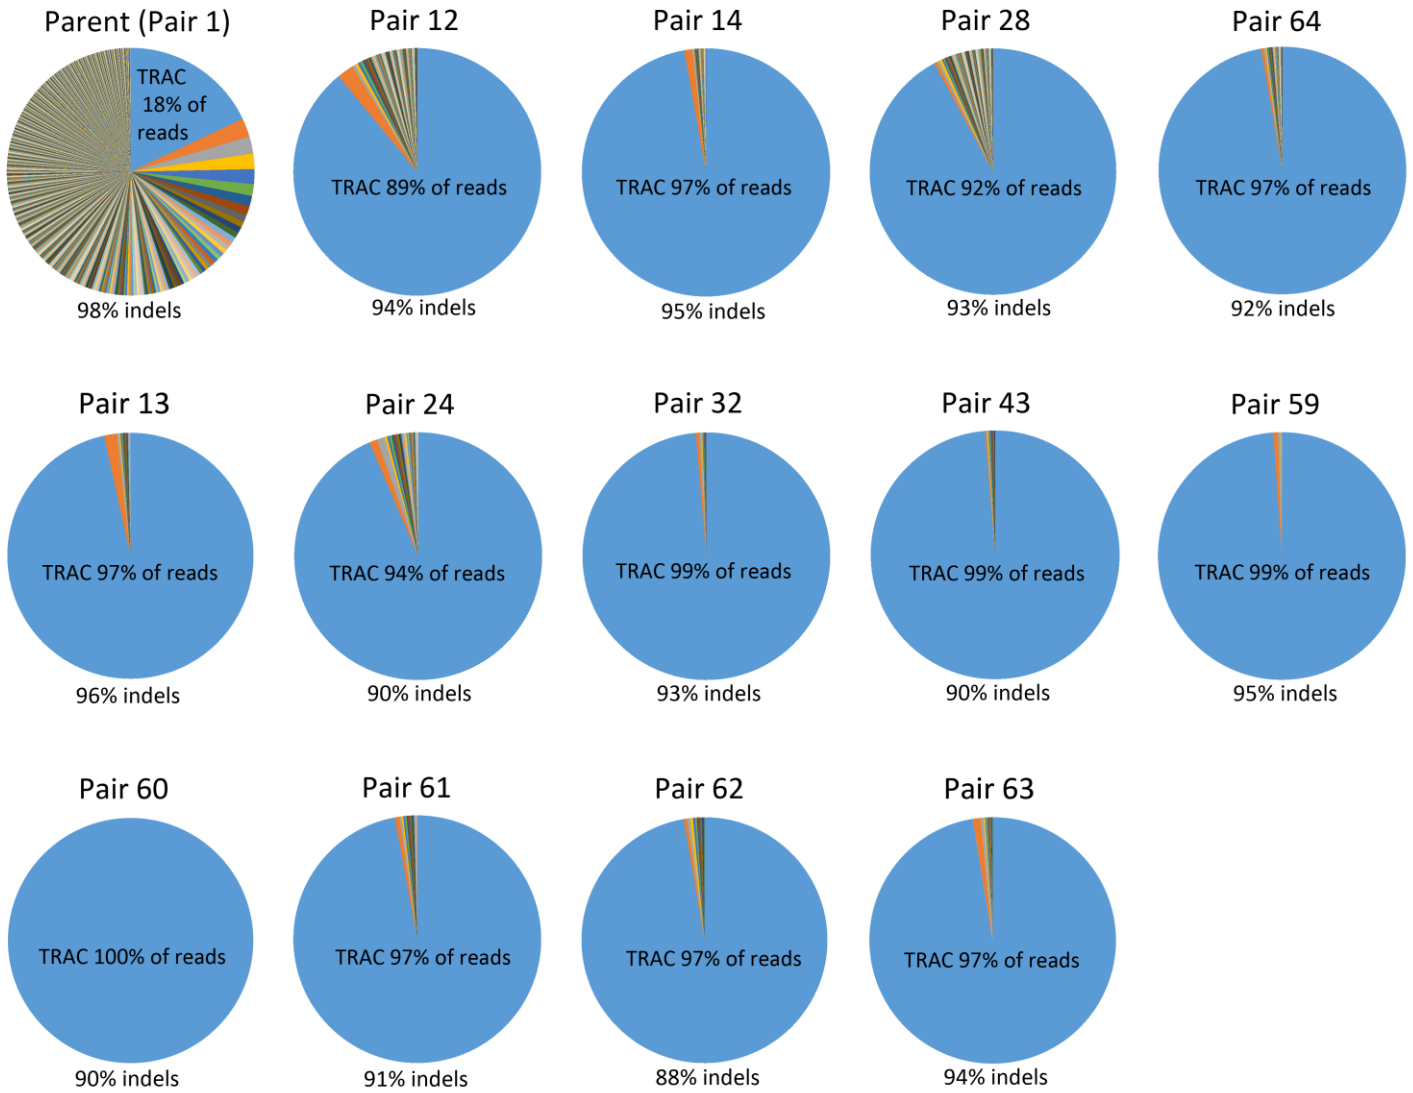

**Supplementary Figure 9**

**Summary of oligonucleotide duplex capture results for the indicated TCR $\alpha$  ZFN pairs**

Each experiment is the combination of 4 biological replicates. Data are displayed as in **Figure 2a**, except that mean on-target % indels are listed beneath the chart for each ZFN. Pairs 1, 12, 14, 28, and 64 were characterized in an initial side-by-side experiment and the remaining pairs were characterized in a second side-by-side experiment which appeared to exhibit a lower background of candidate off-targets. Pairs that performed well within their experimental batch and that yielded high activity in an initial T-cell experiment (data not shown) were characterized further (see **figure 4c** and **4d**).

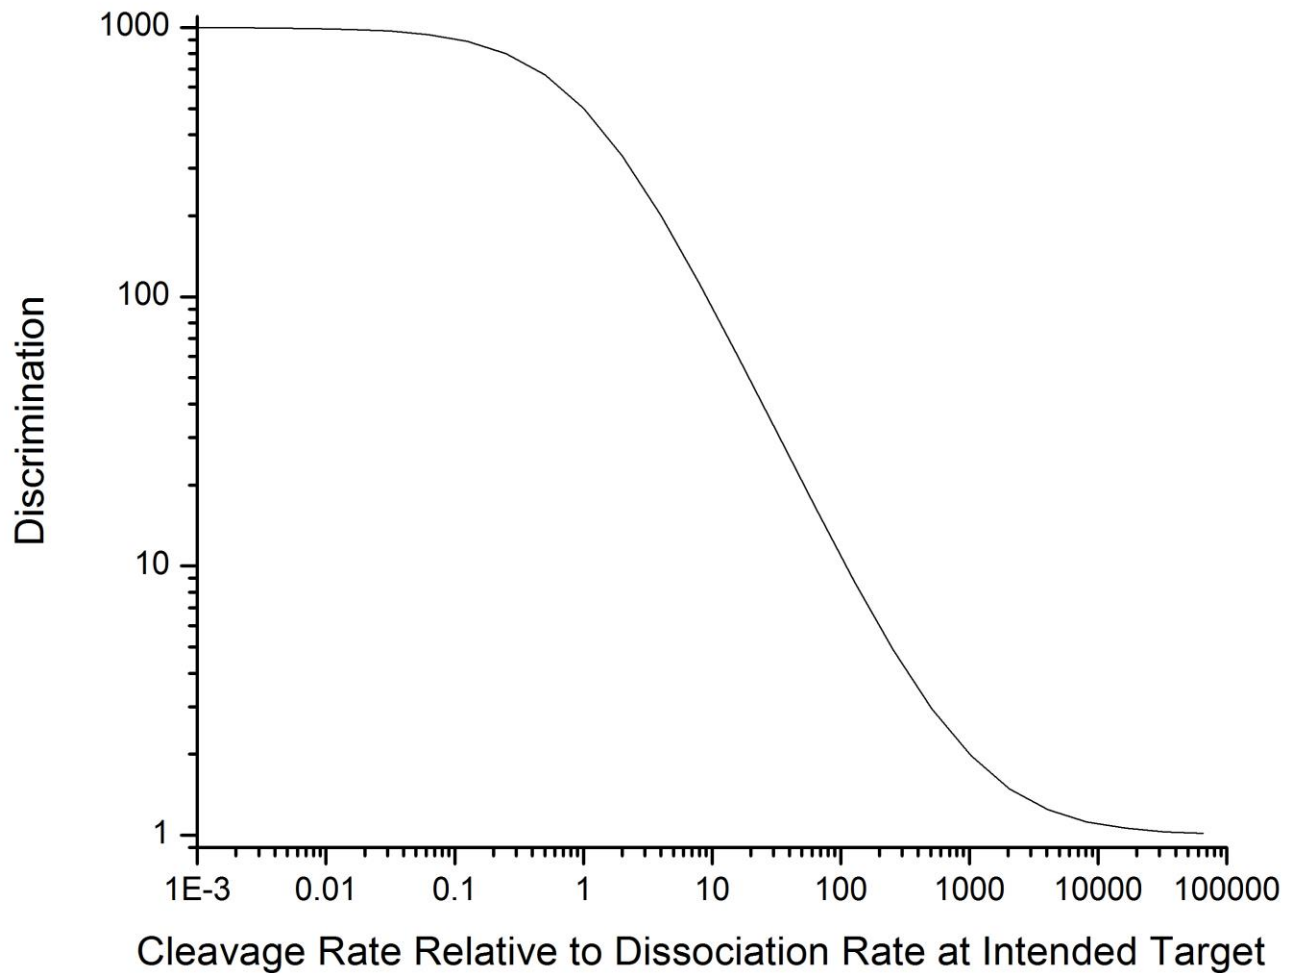

**Supplementary Figure 10**

**Predicted results of varying  $k_2$  on the discrimination between binding sites with  $k_{-1}$  (dissociation) rates that vary by a factor of 1000**

In this case, the dissociation rate for the intended target is 1 and the dissociation for the lower affinity off-target site is much faster at 1000. It is assumed that  $k_2$  and  $k_1$  are identical for both sites since the FokI domain is assumed to be nonspecific and association rates for DNA proteins are often identical with the discrimination between sites reflected by differences in dissociation rates<sup>47</sup>. As described by Hopfield (*Proc. Natl Acad. Sci. USA*, Hopfield, 1974), when  $k_2$  is slow relative to  $k_{-1}$  for the higher affinity site, the ratio of DNA cleavage rates (discrimination) at these two targets approaches the ratio of dissociation rates (i.e. 1000). When  $k_2$  is very fast relative to  $k_{-1}$  for the higher affinity site, the discrimination approaches 1. The plot uses the relationship described by Ninio (*Biochimie*, Ninio, 1975). In terms of the equation in Supplementary Figure 1 and using  $k_{-1A}$  and  $k_{-1B}$  to represent the dissociation rates for the ZFN and the two binding sites, the cleavage discrimination between targets sites is  $(k_2 + k_{-1B}) / (k_2 + k_{-1A})$ .



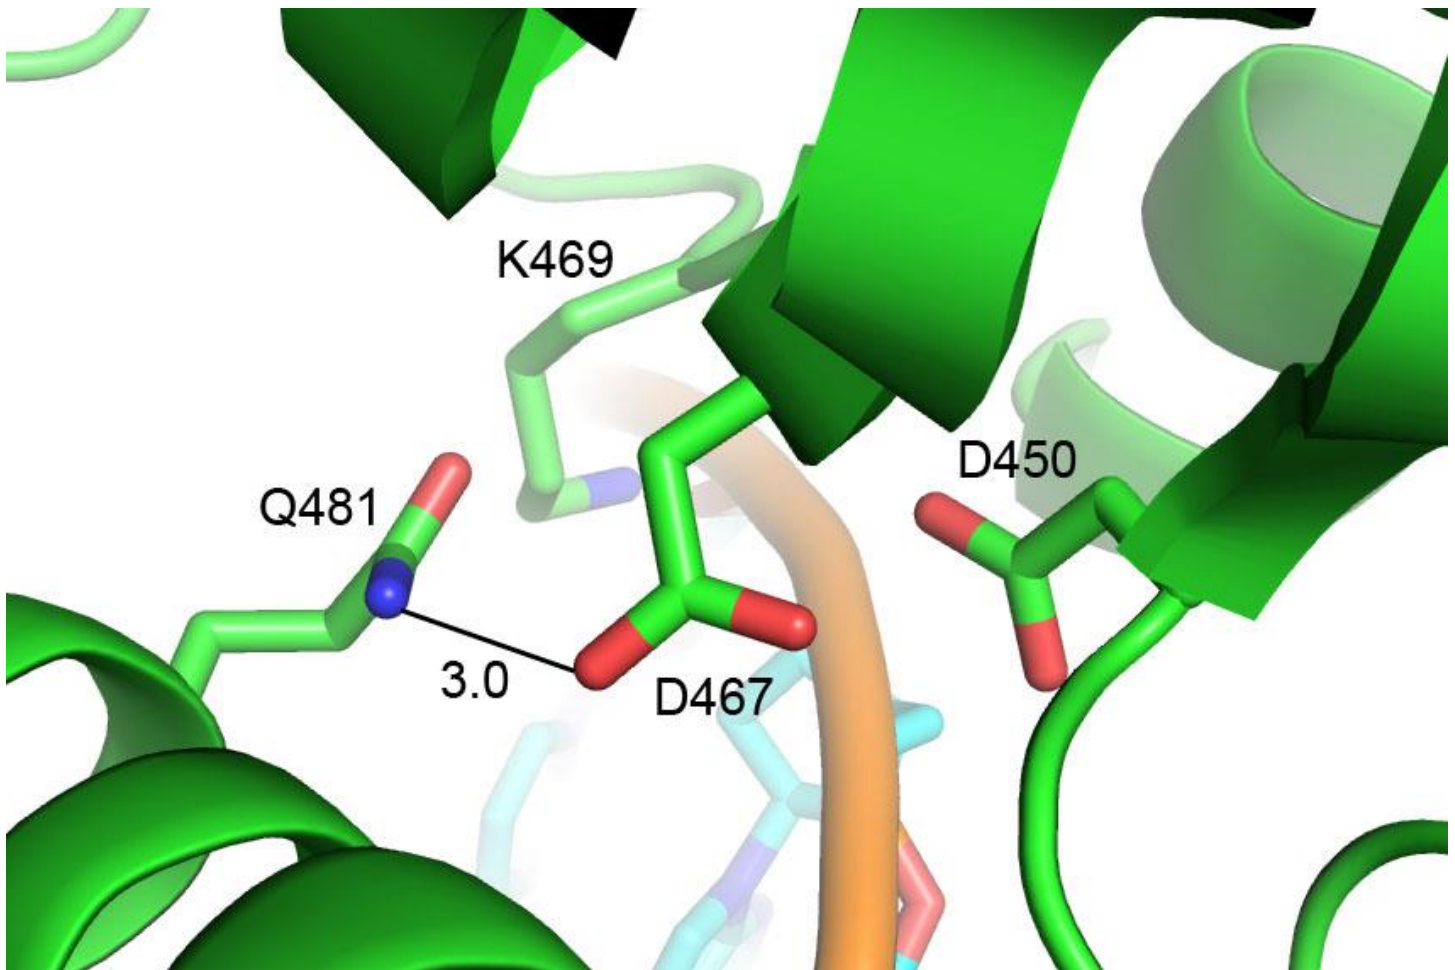

**Supplementary Figure 11**

**Structural arrangement of Q481, active site residues, and the DNA backbone in a structural model of the FokI dimer from 2FOK.pdb docked with DNA<sup>18</sup>**

The distance in Angstroms between Q481 and active site residue D467 is shown. The DNA backbone is rendered in orange and does not contact Q481. Pymol was used to create the image and measure distances between atoms.

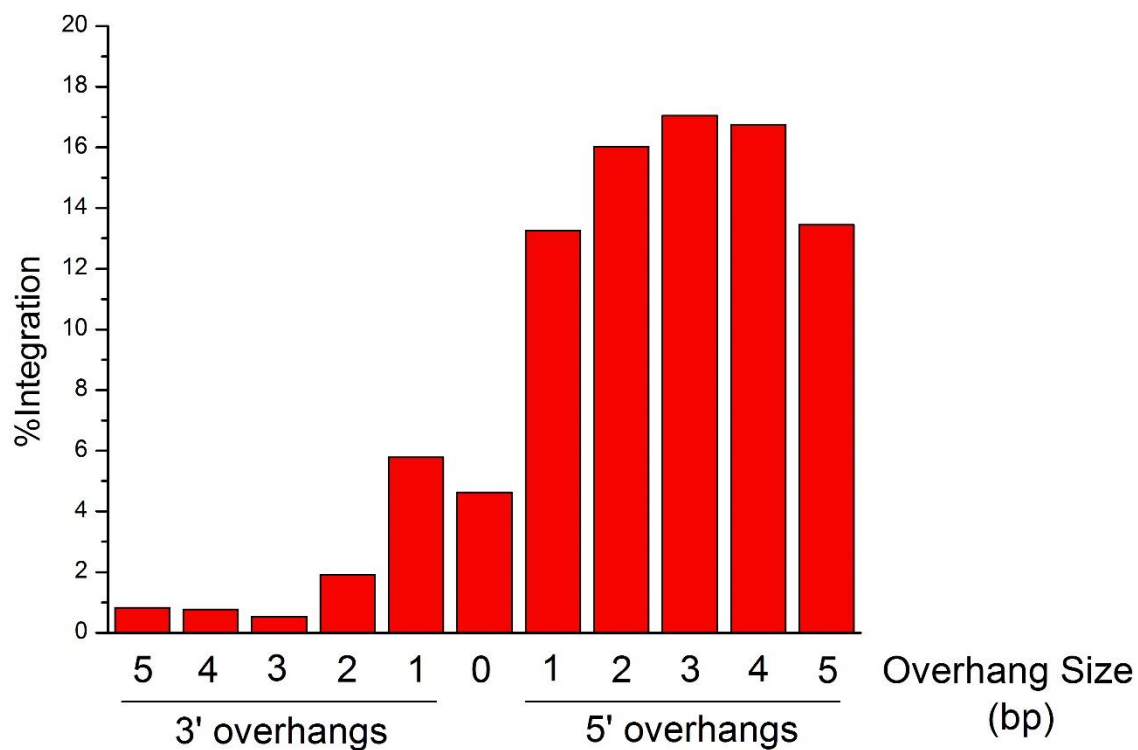

**Supplementary Figure 12**

**Effect of overhang size and polarity on oligonucleotide integration into ZFN-induced double-strand breaks**

Double-stranded oligonucleotides with randomized single-stranded overhangs of indicated lengths and polarities were co-transfected with mRNA encoding the AAVS1 ZFNs into human K562 cells. The locus containing the intended target for the AAVS1 ZFNs was amplified by PCR and then sequenced. The plot shows the percentage of sequence reads containing the entire 34-bp sequence of the double-stranded portion of the oligo.

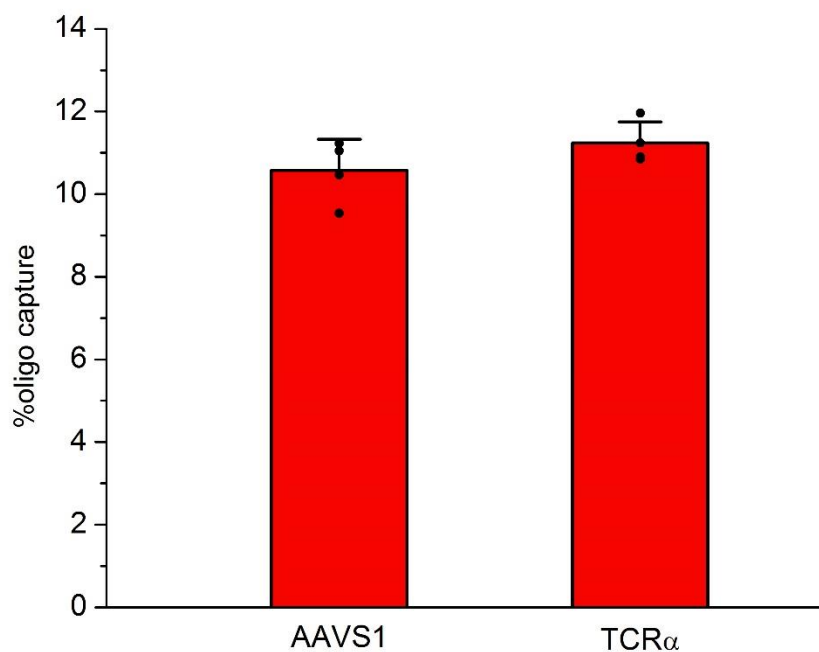

### Supplementary Figure 13

#### Comparison of oligonucleotide integration frequency at the intended targets of the parental AAVS1 and TCR $\alpha$ ZFNs

Bars represent mean values of the percentage of amplicon sequence reads containing the full 34 bp sequence of the GUIDE-seq oligonucleotide from samples used to perform the GUIDE-seq experiment in **Figure 2** (AAVS1) and in **Figure 4** (TCR $\alpha$ ). Error bars indicate standard deviations and values for individual replicates (N=4) are plotted. The target sites for the two AAVS1 ZFN monomers are separated by 6 bp and yield predominantly 4 bp single-stranded overhangs (**Supplementary Figure 14**) while the target sites for the two TCR $\alpha$  ZFN monomers are separated by 5 bp and yield predominantly 5 bp single-stranded overhangs (**Supplementary Figure 15**).

a)

TAGGGACAGGATtGGTGAC

5' -TCCCCTCCACCCACAGTGGGGCCA**CT**AGGGACAGGATTGGTGACAG  
 AGGGGAGGTGGGGTGTACCCCGGTGATCCCTGTCCTAACCACTGTC  
 GGGAGGTGGGGTGTACC

b) unmodified TCCCCTCCACCCACAGTGGGGCCA**CT**AGGGACAGGATTGGTGACAG

|          | %of sequences | Insertions                                                      |
|----------|---------------|-----------------------------------------------------------------|
| Parental | 11.05         | TCCCCTCCACCCACAGTGGG ( <b>GCCA</b> ) GCCACTAGGGACAGGATTGGTGACAG |
|          | 1.19          | TCCCCTCCACCCACAGT ( <b>G</b> ) GGGGCCACTAGGGACAGGATTGGTGACAG    |
|          | 0.54          | TCCCCTCCACCCACAGTGGGGCC ( <b>A</b> ) ACTAGGGACAGGATTGGTGACAG    |
|          | 0.44          | TCCCCTCCACCCACAGTGGG ( <b>GCC</b> ) GCCACTAGGGACAGGATTGGTGACAG  |
|          | 0.28          | TCCCCTCCACCCACAGTGGGGC ( <b>CAC</b> ) CACTAGGGACAGGATTGGTGACAG  |
|          | 0.19          | TCCCCTCCACCCACAGTGGGG ( <b>C</b> ) CCACTAGGGACAGGATTGGTGACAG    |
|          | 0.17          | TCCCCTCCACCCACAGTGGGGCC ( <b>AC</b> ) ACTAGGGACAGGATTGGTGACAG   |
|          | 0.07          | TCCCCTCCACCCACAGTGGG ( <b>CCA</b> ) GCCACTAGGGACAGGATTGGTGACAG  |
|          | 0.06          | TCCCCTCCACCCACAGTGGG ( <b>GCCA</b> ) GCCACTAGGGACAGGATTGGTGACAG |
|          | 0.05          | TCCCCTCCACCCACAGTGGG ( <b>GCCA</b> ) GCCACTAGGGACAGGATTGGTGACAG |
| I479Q    | 8.29          | TCCCCTCCACCCACAGTGGG ( <b>GCCA</b> ) GCCACTAGGGACAGGATTGGTGACAG |
|          | 1.07          | TCCCCTCCACCCACAGT ( <b>G</b> ) GGGGCCACTAGGGACAGGATTGGTGACAG    |
|          | 0.46          | TCCCCTCCACCCACAGTGGGGCC ( <b>A</b> ) ACTAGGGACAGGATTGGTGACAG    |
|          | 0.35          | TCCCCTCCACCCACAGTGGG ( <b>GCC</b> ) GCCACTAGGGACAGGATTGGTGACAG  |
|          | 0.14          | TCCCCTCCACCCACAGTGGGGC ( <b>CAC</b> ) CACTAGGGACAGGATTGGTGACAG  |
|          | 0.11          | TCCCCTCCACCCACAGTGGGG ( <b>C</b> ) CCACTAGGGACAGGATTGGTGACAG    |
|          | 0.06          | TCCCCTCCACCCACAGTGGG ( <b>CCA</b> ) GCCACTAGGGACAGGATTGGTGACAG  |
|          | 0.06          | TCCCCTCCACCCACAGTGGGGCC ( <b>AC</b> ) ACTAGGGACAGGATTGGTGACAG   |
|          | 0.05          | TCCCCTCCACCCACAGTGGG ( <b>GC</b> ) GCCACTAGGGACAGGATTGGTGACAG   |
|          | 0.03          | TCCCCTCCACCCACAGTGGGGCCA ( <b>T</b> ) CTAGGGACAGGATTGGTGACAG    |
| Q481A    | 11.46         | TCCCCTCCACCCACAGTGGG ( <b>GCCA</b> ) GCCACTAGGGACAGGATTGGTGACAG |
|          | 1.54          | TCCCCTCCACCCACAGT ( <b>G</b> ) GGGGCCACTAGGGACAGGATTGGTGACAG    |
|          | 0.70          | TCCCCTCCACCCACAGTGGGGCC ( <b>A</b> ) ACTAGGGACAGGATTGGTGACAG    |
|          | 0.55          | TCCCCTCCACCCACAGTGGG ( <b>GCC</b> ) GCCACTAGGGACAGGATTGGTGACAG  |
|          | 0.17          | TCCCCTCCACCCACAGTGGGGCC ( <b>AC</b> ) ACTAGGGACAGGATTGGTGACAG   |
|          | 0.16          | TCCCCTCCACCCACAGTGGG ( <b>CCA</b> ) GCCACTAGGGACAGGATTGGTGACAG  |
|          | 0.16          | TCCCCTCCACCCACAGTGGGGC ( <b>CAC</b> ) CACTAGGGACAGGATTGGTGACAG  |
|          | 0.10          | TCCCCTCCACCCACAGTGGGG ( <b>C</b> ) CCACTAGGGACAGGATTGGTGACAG    |
|          | 0.08          | TCCCCTCCACCCACAGTGGG ( <b>GC</b> ) GCCACTAGGGACAGGATTGGTGACAG   |
|          | 0.07          | TCCCCTCCACCCACAGTGGGGCCA ( <b>C</b> ) CTAGGGACAGGATTGGTGACAG    |

### Supplementary Figure 14

#### Assessment of indel data for overhangs yielded by cleavage with AAVS1 ZFNs

During NHEJ-mediated repair, overhang fill-in followed by blunt-end ligation comprises a frequent outcome of ZFN-induced double strand breaks, which effectively converts overhangs into duplicated sequence (e.g. see Morton (*Proc. Natl Acad. Sci. USA*, Morton et al., 2006), figure 4). By examining indel data for minor duplications it is possible to infer the predominant overhang type(s) generated during cleavage. **a)** Arrangement of the binding sites for the left and right AAVS1 ZFNs at the intended target. **b)** The ten most common insertions identified via deep sequencing of a PCR amplicon of this region from cells treated with the parent AAVS1 ZFNs, the FokI I479Q variants, or the FokI Q481A FokI variants. Inserted bases are highlighted in red and flanked by brackets; in cases where the exact position of the insertion is ambiguous, it is shown in the leftmost possible position. Note that only the portion of the amplicon flanking the intended target site is shown. Numerical values indicate the percentage of sequence reads corresponding to each sequence from the first replicate of the relevant samples from **Table 1**. For each ZFN dimer, it can be seen that the large majority of insertions (top entry in each alignment) comprise the same GCCA duplication indicating that the I479Q and Q481A substitutions do not alter overhang lengths yielded by cleavage. Note that each entry represents a distinct amplicon sequence; multiple listings of the same insertion in a given alignment indicates the presence of additional mutations elsewhere in the amplicon.

a)

```

          CCTGAAAGTGGCCGG
5' - CAGTGATTGGGTTCCGAATCCTCCTCCTGAAAGTGGCCGGT
      GTCATAACCCAAGGCTTAGGAGGAGGACTTTCACCGGCCCA - '5
          CACTAACCCAAGGCTTAG

```

b)

|          | unmodified                                |                                                     |
|----------|-------------------------------------------|-----------------------------------------------------|
|          | CAGTGATTGGGTTCCGAATCCTCCTCCTGAAAGTGGCCGGT |                                                     |
|          |                                           | Insertions                                          |
| Parental | 13.15                                     | CAGTGATTGGGTTCCGAATC {CTCCT} CTCCTCCTGAAAGTGGCCGGT  |
|          | 7.33                                      | CAGTGATTGGGTTCCGAA {TCC} TCCTCCTCCTGAAAGTGGCCGGT    |
|          | 1.20                                      | CAGTGATTGGGTTCCGAAT {CCTC} CCTCCTCCTGAAAGTGGCCGGT   |
|          | 0.52                                      | CAGTGATTGGGTTCCGAATC {CT} CTCCTCCTGAAAGTGGCCGGT     |
|          | 0.42                                      | CAGTGATTGGGTTCCGAATCC {TCCT} TCCTCCTGAAAGTGGCCGGT   |
|          | 0.12                                      | CAGTGATTGGGTTCCGAATCCTC {CT} CTCCTGAAAGTGGCCGGT     |
|          | 0.06                                      | CAGTGATTGGGTTCCGAA {TCCTCC} TCCTCCTCCTGAAAGTGGCCGGT |
|          | 0.05                                      | CAGTGATTGGGTTCCGAATCCTCC {T} TCCTGAAAGTGGCCGGT      |
|          | 0.04                                      | CAGTGATTGGGTTCCGAATC {CTCCT} CTCCTCCTGAAAGTGGCCGGT  |
|          | 0.04                                      | CAGTGATTGGGTTCCGAATCCTCCT {CTCCC} CCTGAAAGTGGCCGGT  |
| Pair14   | 13.81                                     | CAGTGATTGGGTTCCGAATC {CTCCT} CTCCTCCTGAAAGTGGCCGGT  |
|          | 7.21                                      | CAGTGATTGGGTTCCGAA {TCC} TCCTCCTCCTGAAAGTGGCCGGT    |
|          | 1.12                                      | CAGTGATTGGGTTCCGAAT {CCTC} CCTCCTCCTGAAAGTGGCCGGT   |
|          | 0.34                                      | CAGTGATTGGGTTCCGAATC {CT} CTCCTCCTGAAAGTGGCCGGT     |
|          | 0.33                                      | CAGTGATTGGGTTCCGAATCC {TCCT} TCCTCCTGAAAGTGGCCGGT   |
|          | 0.08                                      | CAGTGATTGGGTTCCGAATCCTC {CT} CTCCTGAAAGTGGCCGGT     |
|          | 0.07                                      | CAGTGATTGGGTTCCGAATCCT {CC} CCTCCTGAAAGTGGCCGGT     |
|          | 0.06                                      | CAGTGATTGGGTTCCGAAT {CTCC} CCTCCTCCTGAAAGTGGCCGGT   |
|          | 0.05                                      | CAGTGATTGGGTTCCGAATC {CTCCT} CTCCTCCTGAAAGTGGCCGGT  |
|          | 0.05                                      | CAGTGATTGGGTTCCGAATCCTCC {T} TCCTGAAAGTGGCCGGT      |
| Pair60   | 13.52                                     | CAGTGATTGGGTTCCGAATC {CTCCT} CTCCTCCTGAAAGTGGCCGGT  |
|          | 8.03                                      | CAGTGATTGGGTTCCGAA {TCC} TCCTCCTCCTGAAAGTGGCCGGT    |
|          | 1.23                                      | CAGTGATTGGGTTCCGAAT {CCTC} CCTCCTCCTGAAAGTGGCCGGT   |
|          | 0.40                                      | CAGTGATTGGGTTCCGAATCC {TCCT} TCCTCCTGAAAGTGGCCGGT   |
|          | 0.30                                      | CAGTGATTGGGTTCCGAATC {CT} CTCCTCCTGAAAGTGGCCGGT     |
|          | 0.11                                      | CAGTGATTGGGTTCCGAAT {C} CCTCCTCCTGAAAGTGGCCGGT      |
|          | 0.06                                      | CAGTGATTGGGTTCCGAATC {CTCCT} CTCCTCCTGAAAGTGGCCGGT  |
|          | 0.06                                      | CAGTGATTGGGTTCCGAATCCTC {CT} CTCCTGAAAGTGGCCGGT     |
|          | 0.05                                      | CAGTGATTGGGTTCCGAATC {CTCCT} CTCCTCCTGAAAGTGGCCGGT  |
|          | 0.05                                      | CAGTGATTGGGTTCCGAATCCT {CC} CCTCCTGAAAGTGGCCGGT     |

## Supplementary Figure 15

### Assessment of indel data for overhangs yielded by cleavage with TCR $\alpha$ ZFNs.

a) Arrangement of the binding sites for the left and right TCR $\alpha$  ZFNs at the intended target. b) The ten most common insertions identified via deep sequencing of a PCR amplicon of this region from cells treated with the parent TCR $\alpha$  ZFNs, or with the Pair14 or Pair60 variants. Alignments are formatted as in **Supplementary Figure 14**. Numerical values indicate the percentage of sequence reads corresponding to each sequence from the 400 ng dose underlying **Supplementary Table 16**. For each ZFN dimer, it can be seen that the large majority of insertions (top entry in each alignment) comprise the same CTCCT duplication indicating that DNA cleavage by the parent and variants yield comparable overhang lengths. For additional detail see the legend for **Supplementary Figure 14**.
